# Supplementary material for: Development of ‘Core Outcome Sets’ for Meningioma in Clinical Studies (The COSMIC Project): protocol for two systematic literature reviews, eDelphi surveys and online consensus meetings
Source: PubMed Central journal article supplement — BMJ Open. 2022 May 9;12(5):e057384. doi: 10.1136/bmjopen-2021-057384 (PMC9086638; doi:10.1136/bmjopen-2021-057384), 2022-05-09
Supplement: bmjopen-2021-057384.draft_revisions.pdf [file bmjopen-2021-057384.draft_revisions.pdf]

# BMJ Open

BMJ Open is committed to open peer review. As part of this commitment we make the peer review history of every article we publish publicly available.

When an article is published we post the peer reviewers' comments and the authors' responses online. We also post the versions of the paper that were used during peer review. These are the versions that the peer review comments apply to.

The versions of the paper that follow are the versions that were submitted during the peer review process. They are not the versions of record or the final published versions. They should not be cited or distributed as the published version of this manuscript.

BMJ Open is an open access journal and the full, final, typeset and author-corrected version of record of the manuscript is available on our site with no access controls, subscription charges or pay-per-view fees (<http://bmjopen.bmj.com>).

If you have any questions on BMJ Open's open peer review process please email [info.bmjopen@bmj.com](mailto:info.bmjopen@bmj.com)

# BMJ Open

## Development of 'Core Outcome Sets' for Meningioma in Clinical Studies (The COSMIC Project): Protocol for two Systematic Literature Reviews, eDelphi Surveys and Consensus Meetings.

|                               |                                                                                                                                                                                                                                                                                                                                                                                                                                                                                                                                                                                                                                                                                                                                                                                                                                                                                                                                                                                                                                                                                                                                                                                                                                                                                                                                                                                                                                                                                                                                                                                                                                                                                                                                                                                                                                                                                                                                                                                                                                                                                                |
|-------------------------------|------------------------------------------------------------------------------------------------------------------------------------------------------------------------------------------------------------------------------------------------------------------------------------------------------------------------------------------------------------------------------------------------------------------------------------------------------------------------------------------------------------------------------------------------------------------------------------------------------------------------------------------------------------------------------------------------------------------------------------------------------------------------------------------------------------------------------------------------------------------------------------------------------------------------------------------------------------------------------------------------------------------------------------------------------------------------------------------------------------------------------------------------------------------------------------------------------------------------------------------------------------------------------------------------------------------------------------------------------------------------------------------------------------------------------------------------------------------------------------------------------------------------------------------------------------------------------------------------------------------------------------------------------------------------------------------------------------------------------------------------------------------------------------------------------------------------------------------------------------------------------------------------------------------------------------------------------------------------------------------------------------------------------------------------------------------------------------------------|
| Journal:                      | <i>BMJ Open</i>                                                                                                                                                                                                                                                                                                                                                                                                                                                                                                                                                                                                                                                                                                                                                                                                                                                                                                                                                                                                                                                                                                                                                                                                                                                                                                                                                                                                                                                                                                                                                                                                                                                                                                                                                                                                                                                                                                                                                                                                                                                                                |
| Manuscript ID                 | bmjopen-2021-057384                                                                                                                                                                                                                                                                                                                                                                                                                                                                                                                                                                                                                                                                                                                                                                                                                                                                                                                                                                                                                                                                                                                                                                                                                                                                                                                                                                                                                                                                                                                                                                                                                                                                                                                                                                                                                                                                                                                                                                                                                                                                            |
| Article Type:                 | Protocol                                                                                                                                                                                                                                                                                                                                                                                                                                                                                                                                                                                                                                                                                                                                                                                                                                                                                                                                                                                                                                                                                                                                                                                                                                                                                                                                                                                                                                                                                                                                                                                                                                                                                                                                                                                                                                                                                                                                                                                                                                                                                       |
| Date Submitted by the Author: | 14-Sep-2021                                                                                                                                                                                                                                                                                                                                                                                                                                                                                                                                                                                                                                                                                                                                                                                                                                                                                                                                                                                                                                                                                                                                                                                                                                                                                                                                                                                                                                                                                                                                                                                                                                                                                                                                                                                                                                                                                                                                                                                                                                                                                    |
| Complete List of Authors:     | <p>millward, Christopher; University of Liverpool, Institute of Systems, Molecular, &amp; Integrative Biology; The Walton Centre NHS Foundation Trust, Department of Neurosurgery</p> <p>Armstrong, Terri S. ; National Cancer Institute, Neuro-Oncology Branch, Center for Cancer Research</p> <p>Barrington, Heather; University of Liverpool, Health Data Science</p> <p>Bell, Sabrina; Brain Tumor Charity</p> <p>Brodbelt, Andrew; Institute of Systems, Molecular, &amp; Integrative Biology; The Walton Centre NHS Foundation Trust, Department of Neurosurgery</p> <p>Bulbeck, Helen; Brainstrust</p> <p>Crofton, Anna; The Walton Centre NHS Foundation Trust, Department of Neurosurgery</p> <p>Dirven, Linda; Leiden University Medical Center, Department of Neurology; Medical Centre Haaglanden, Department of Neurology</p> <p>Georgious, Theo; Brain Tumor Charity</p> <p>Grundy, Paul; University Hospital Southampton NHS Foundation Trust, Department of Neurosurgery</p> <p>Islim, Abdurrahman ; University of Liverpool, Institute of Systems, Molecular, &amp; Integrative Biology; The Walton Centre NHS Foundation Trust, Department of Neurosurgery</p> <p>Javadpour, Mohsen; Beaumont Hospital, National Centre for Neurosurgery</p> <p>Keshwara, Sumirat M.; University of Liverpool, Institute of Systems, Molecular, &amp; Integrative Biology; The Walton Centre NHS Foundation Trust, Department of Neurosurgery</p> <p>Koszdin, Shelli; Palo Alto VA Medical Center, Pharmacy</p> <p>Marson, Tony; University of Liverpool, Institute of Systems, Molecular, &amp; Integrative Biology; The Walton Centre NHS Foundation Trust, Department of Neurology</p> <p>McDermott, Michael W.; Florida International University, Division of Neuroscience</p> <p>Meling, Torstein R.; Geneva University Hospitals, Department of Neurosurgery</p> <p>Oliver, Kathy; IBTA</p> <p>Plaha, Puneet; University of Oxford, Nuffield Department of Surgical Sciences</p> <p>Preusser, Matthias; Medical University of Vienna, Division of Oncology, Department of Medicine</p> |

|           |                                                                                                                                                                                                                                                                                                                                                                                                                                                                                                                                                                                                                                                                                                                                                                                                                                                                                                                                                                                                                                                                                                             |
|-----------|-------------------------------------------------------------------------------------------------------------------------------------------------------------------------------------------------------------------------------------------------------------------------------------------------------------------------------------------------------------------------------------------------------------------------------------------------------------------------------------------------------------------------------------------------------------------------------------------------------------------------------------------------------------------------------------------------------------------------------------------------------------------------------------------------------------------------------------------------------------------------------------------------------------------------------------------------------------------------------------------------------------------------------------------------------------------------------------------------------------|
|           | Santarius, Thomas; Addenbrooke's Hospital, Department of Neurosurgery<br>Srikandarajah, Nisaharan; University of Liverpool, Institute of Systems, Molecular, & Integrative Biology; The Walton Centre NHS Foundation Trust, Department of Neurosurgery<br>Taphoorn, Martin J.B.; Leiden University Medical Center, Department of Neurology; Medical Centre Haaglanden, Department of Neurology<br>Turner, Carole; Addenbrooke's Hospital, Department of Neurosurgery<br>Watts, Colin; University of Birmingham, Institute of Cancer and Genomic Studies<br>Weller, Michael; University of Zurich, Department of Neurology<br>Williamson, Paula; University of Liverpool, Institute of Population Health<br>Zadeh, Gelareh; University of Toronto, Department of Surgery<br>Zamanipour Najafabadi, Amir H.; Leiden University Medical Center, University Neurosurgical Center Holland<br>Jenkinson, Michael; The Walton Centre NHS Foundation Trust; University of Liverpool, Institute of Systems, Molecular, & Integrative Biology<br>ICOM, International Consortium on Meningiomas; University of Toronto |
| Keywords: | Neurosurgery < SURGERY, Clinical trials < THERAPEUTICS, Neurological oncology < NEUROLOGY                                                                                                                                                                                                                                                                                                                                                                                                                                                                                                                                                                                                                                                                                                                                                                                                                                                                                                                                                                                                                   |
|           |                                                                                                                                                                                                                                                                                                                                                                                                                                                                                                                                                                                                                                                                                                                                                                                                                                                                                                                                                                                                                                                                                                             |

SCHOLARONE™  
Manuscripts

## Submission of manuscript to BMJ Open

1  
2  
3  
4  
5 Development of 'Core Outcome Sets' for Meningioma in Clinical Studies (The COSMIC Project):  
6

7 Protocol for two Systematic Literature Reviews, eDelphi Surveys and Consensus Meetings.  
8  
9  
10  
11  
12  
13  
14  
15  
16  
17  
18  
19  
20  
21  
22  
23  
24  
25  
26  
27  
28  
29  
30  
31  
32  
33  
34  
35  
36  
37  
38  
39  
40  
41  
42  
43  
44  
45  
46  
47  
48  
49  
50  
51  
52  
53  
54  
55  
56  
57  
58  
59  
60

For peer review only

## Authors & Affiliations

Christopher P. Millward\*

Terri S. Armstrong

Heather Barrington

Sabrina Bell

Andrew R. Brodbelt

Helen Bulbeck

Anna Crofton

Linda Dirven

Theo Georgious

Paul Grundy

Abdurrahman I. Islim

Mohsen Javadpour

Sumirat M. Keshwara

Shelli Diane Koszdin

Anthony G. Marson

Michael W. McDermott

Torstein R. Meling

Kathy Oliver

Puneet Plaha

Matthias Preusser

Thomas Santarius

Nisaharan Srikandarajah

Martin J.B. Taphoorn

Carole Turner

Colin Watts

Michael Weller

Paula R. Williamson

Gelareh Zadeh

Amir H. Zamanipoor Najafabadi

Michael D. Jenkinson

On behalf of EORTC BTG, ICOM, EANO, SNO, RANO-PRO, BNOS, SBNS, BIMS, TBTC, International Brain Tumour Alliance, Brainstrust, and Brain Tumour Foundation of Canada.

- 1 • Institute of Systems, Molecular, & Integrative Biology, University of Liverpool, UK (CPM, ARB, AII, SMK, AGM,  
2 NS, MDJ).
- 3 • Department of Neurosurgery, The Walton Centre NHS Foundation Trust, Liverpool, UK (CPM, ARB, AC, AII,  
4 SMK, NS, MDJ).
- 5 • Neuro-Oncology Branch, Center for Cancer Research, National Cancer Institute, Bethesda, Maryland, USA (TSA)
- 6 • Institute of Population Health, University of Liverpool, UK (HB, PRW)
- 7 • The Brain Tumour Charity (SB, TG).
- 8 • Brainstrust – the brain cancer people (HB).
- 9 • Department of Neurology, Leiden University Medical Center, The Netherlands (LD, MJBT).
- 10 • Department of Neurology, Haaglanden Medical Center, The Hague, The Netherlands (LD, MJBT).
- 11 • Department of Neurosurgery, University Hospital Southampton, UK (PG).
- 12 • National Centre for Neurosurgery, Beaumont Hospital, Dublin, Ireland (MJ).
- 13 • Veterans Affairs Healthcare System, Palo Alto, California, USA (SDK)
- 14 • Department of Neurology, The Walton Centre NHS Foundation Trust, Liverpool, UK (AGM).
- 15 • Division of Neuroscience, Florida International University, Florida, USA (MWM).
- 16 • Department of Neurosurgery, Geneva University Hospital, Geneva, Switzerland (TRM).
- 17 • International Brain Tumour Alliance (KO).
- 18 • Nuffield Department of Surgical Sciences, University of Oxford, UK (PP).
- 19 • Division of Oncology, Department of Medicine, Medical University of Vienna, Austria (MP).
- 20 • Department of Neurosurgery, Addenbrooke's Hospital & University of Cambridge, UK (TS, CT).
- 21 • Institute of Cancer and Genomic Sciences, University of Birmingham, UK (CW).
- 22 • Department of Neurology, University Hospital and University of Zurich, Switzerland (MW).
- 23 • Department of Surgery, University of Toronto, Canada (GZ).
- 24 • University Neurosurgical Center Holland, Leiden University Medical Centre, Haaglanden Medical Center, Haga  
25 Teaching Hospitals, Leiden and The Hague, The Netherlands (AHZN).

### 44 **\*Corresponding author**

45 Mr Christopher P. Millward

46 Department of Neurosurgery

47 The Walton Centre NHS Foundation Trust

48 Lower Lane

49 Liverpool, L9 7LJ

50 Emails: [drcpm@liverpool.ac.uk](mailto:drcpm@liverpool.ac.uk)

## Abstract

### Introduction:

Meningioma is the most common primary intracranial tumour in adults. The majority are non-malignant, but a proportion behave more aggressively. Incidental/minimally symptomatic meningioma are often managed by serial imaging. Symptomatic meningiomas, those that threaten neurovascular structures or demonstrate radiological growth, are usually resected as first-line management strategy. For patients in poor clinical condition, or with inoperable, residual, or recurrent disease, radiotherapy is often utilised as primary or adjuvant treatment. Effective pharmacotherapy treatments do not currently exist. There is heterogeneity in the outcomes reported in meningioma clinical studies. Two 'Core Outcome Sets' (COS) will be developed, (COSMIC: Intervention) for use in meningioma clinical effectiveness trials, and (COSMIC: Observation) for use in clinical studies of incidental/untreated meningioma.

### Methods and Analysis:

Two systematic literature reviews and trial registry searches will identify outcomes reported in published and ongoing 1) meningioma clinical effectiveness trials, and 2) clinical studies of incidental/untreated meningioma. Outcomes include those that are clinician-reported, patient-reported, caregiver-reported, and based on objective tests (e.g. neurocognitive tests), as well as measures of progression and survival. Outcomes will be deduplicated and categorised to generate two long-lists. Two existing systematic literature reviews, along with patient-centred outcomes identified from published semi-structured interviews with meningioma patients (where applicable) will also be explored to check for lacking patient-reported and neurocognitive outcomes. The two long-lists will be prioritised through two, 2-round, international, modified eDelphi surveys including meningioma patients, healthcare professionals, researchers, and those in caring/supporting roles. The two final COS will be ratified through two, one-day consensus meetings, with representation from all stakeholder groups.

### Ethics and Dissemination:

Institutional review board (University of Liverpool) approval was obtained for the conduct of this study. Participant eConsent will be obtained prior to participation in the eDelphi surveys and consensus meetings. The eDelphi long-lists and two final COS will be published and freely available.

**Key words:** Core Outcome Set, Meningioma, Clinical trial

**Trial registration number:**

This study is registered with the Core Outcome Measures in Effectiveness Trials (COMET) database as study 1508 and accessible at (<https://www.comet-initiative.org/Studies/Details/1508>). This study has University of Liverpool Sponsorship and ethical approval (Ref UoL001601).

**Abstract Word Count:** 300**Manuscript Word Count:** 7964

For peer review only



## STRENGTHS AND LIMITATIONS OF THIS STUDY

- Comprehensive systematic literature reviews will identify outcomes reported in published intracranial meningioma clinical effectiveness trials and clinical studies of incidental/untreated intracranial meningioma (reported according to Preferred Reporting Items for Systematic Reviews and Meta-Analyses (PRISMA) guidelines).
- Unique patient-reported and neurocognitive outcomes extracted from existing systematic literature reviews, along with patient-centred outcomes identified from published, semi-structured interviews with meningioma patients, will be explored and supplement two outcome long-lists, when applicable.
- Unique outcomes (classified according to the Core Outcome Measures in Effectiveness Trials (COMET) taxonomy) will be prioritised through consensus methodology including two, 2-round, international, multi-stakeholder, modified eDelphi surveys, followed by two consensus meetings, to ratify the COSMIC: Intervention and COSMIC: Observation COS.
- COS for intracranial meningioma do not exist but are urgently needed to ensure core outcomes relevant to meningioma patients, healthcare professionals, researchers, and other key stakeholders are measured in future meningioma clinical studies.
- ‘How’ and ‘when’ each outcome is measured is beyond the scope of this work and will be the focus of future research.

## Introduction

Meningioma is the most common primary intracranial tumour accounting for approximately 38% of all primary tumours of the central nervous system, with an estimated age-adjusted incidence of 8.8 per 100,000 population per year.[1] Meningioma are more than twice as common in females (12 vs 5.3 per 100,000 population).[1] Median age at diagnosis is 66 years, and incidence increases with age.[1] The World Health Organization (WHO) classification of tumours of the central nervous system describes three grades of meningioma, with the most recent distribution by grade as follows; 80.4% benign (WHO grade 1), 17.9% atypical (WHO grade 2) and 1.6% malignant (WHO grade 3).[1, 2] All meningiomas have a long-term risk of recurrence, as well as progression to a higher tumour grade.

For symptomatic meningioma, those that threaten neurovascular structures or demonstrate growth on interval imaging, a treatment intervention is warranted. Surgical resection is often the preferred first-line management strategy; however, for poor surgical candidates, patients with inoperable, residual, or recurrent disease, radiotherapy may be used as primary or adjuvant treatment to obtain disease control. Despite studies investigating different agents, there are no effective pharmacotherapy treatments.[3, 4] On the other hand, incidental intracranial meningiomas may never require treatment. International consensus guidelines recommend interval MRI monitoring, however details surrounding the intervals and duration of follow-up, and indications for treatment are lacking.[5] A very low percentage of patients with an incidental intracranial meningioma develop symptoms during follow-up; 0-8%, however, the risk of growth has been reported to be between 10% and 70%.[6, 7] This heterogeneity in imaging behaviour leads to management decisions recommended to patients varying between active long-term MRI and clinical monitoring or upfront treatment with surgery or radiotherapy.[8]

### Intracranial meningioma clinical effectiveness trials

Clinical effectiveness trials in intracranial meningioma are sparse, but important research questions remain to be answered, especially for recurrent and high-grade meningioma. Two phase 2 studies investigating the efficacy of adjuvant radiotherapy following surgical resection of high-grade meningioma have been reported; Radiation Therapy Oncology Group (RTOG) 0539 [9] and the European Organisation for Research and Treatment of Cancer (EORTC) 22042,[10] as well as a phase 2 trial of trabectedin for recurrent grade 2/3 meningioma.[11] There are currently two phase 3 randomized controlled trials underway to establish the role of radiotherapy after gross-total resection of WHO

1 grade 2 meningioma; ROAM/EORTC 1308 [12] and NRG-BN003,[13] as well as a phase 2 trial of Vismodegib and  
2 FAK inhibitor GSK2256098 for progressive meningiomas with SMO/AKT/NF2 mutations.[14] There are other clinical  
3 effectiveness trials in development, such as STOP'EM which will aim to establish the role of prophylactic levetiracetam  
4 in seizure naïve patients undergoing resection of meningioma.[15] However, the outcomes measured and reported in  
5 meningioma clinical effectiveness trials are not standardised.  
6  
7  
8  
9

### 10 11 12 **Clinical studies of incidental and untreated intracranial meningioma**

13  
14  
15 Clinical studies of untreated intracranial meningioma are rare. Recent work has attempted to accurately define risk  
16 factors for untreated meningioma growth. The **Asan Intracranial Meningioma Scoring System (AIMSS)** and **Incidental**  
17 **Meningioma: Prognostic Analysis Using Patient Comorbidity and MRI Tests (IMPACT)** calculator stratify patients  
18 based on the imaging features of a meningioma into risk groups.[16, 17] Albeit both scoring systems require validation  
19 with external datasets, they underpin clinical equipoise in patients with an untreated meningioma and pave the way for  
20 prospective clinical studies. Patients with meningiomas at high risk of progression e.g.  $\geq 3$  cm, T2 hyperintense and  
21 with peri-tumoural signal change (indicative of vasogenic oedema) are likely to benefit from an intervention trial,  
22 whereas patients with low- or medium-risk meningiomas may draw more benefit from trials that compare different  
23 monitoring strategies. Again, the outcomes measured and reported in clinical studies of incidental and untreated  
24 intracranial meningioma are also not standardised.  
25  
26  
27  
28  
29  
30  
31  
32  
33  
34  
35  
36  
37

### 38 **Rationale for the development of Core Outcome Sets for intracranial meningioma**

39  
40 Interest in meningioma is increasing, in part due to the 'meningiomics' revolution, which offers the prospect of treatment  
41 arm stratification by molecular and genomic aberration, and the potential for personalised management options.[18]  
42 With this comes the difficulty of recruitment of a sufficient number of patients into treatment arms, for instance, when  
43 stratification is by a single point mutation present in only 5-10% of what is already a rare disease. For this reason, future  
44 meningioma clinical effectiveness trials will need to be 1) global, multi-institutional efforts 2) allow meaningful  
45 comparison across studies in order to determine comparative efficacy, 3) measure the outcomes that are important to all  
46 stakeholders including meningioma patients, and 4) resourceful and not performed in duplicate, or near duplicate with  
47 different outcomes assessed. The development of a core outcome set (COS) for meningioma to be used in future clinical  
48 effectiveness trials will enable the alignment of these aims.  
49  
50  
51  
52  
53  
54  
55  
56  
57  
58  
59  
60

1 There is also increasing interest in those asymptomatic patients with an incidentally discovered intracranial meningioma,  
2 who may never require treatment. The balance between observation and intervention, and the benefit vs. harm outcome  
3 is not yet clear. Future prospective clinical studies will benefit from the implementation of a COS that is specific to this  
4 patient group, in recognition of the specific outcomes that are likely to be considered core.  
5  
6  
7  
8  
9

10 A COS is defined as the *minimum* set of outcomes that should be measured and reported in all clinical trials of a specific  
11 condition.[19] To date, over 400 COS have been developed for various diseases and conditions, with over 300 in  
12 progress, and they are increasingly recognized as critical to the design of clinical research.[20] None have yet been  
13 developed within the field of neuro-oncology. The aim of this project is to develop two COS for intracranial  
14 meningioma; one for clinical effectiveness trials (COSMIC: Intervention) and one for observational studies (COSMIC:  
15 Observation). This novel methodological approach has been chosen because meningioma is a highly heterogeneous  
16 disease, and we assume that the outcomes likely to be considered core by stakeholders, will be different for a COS  
17 developed for interventional, in comparison to observational studies. This protocol describes the development of both  
18 COS. The COS should be appropriately utilised in future intracranial meningioma clinical effectiveness trials across the  
19 breath of interventions being tested, and future clinical studies of incidental and untreated intracranial meningioma.  
20  
21  
22  
23  
24  
25  
26  
27  
28  
29  
30  
31  
32  
33

34 The specific objectives of this project are as follows:

- 35 1. Identify outcomes reported in ongoing and published meningioma clinical effectiveness trials and clinical  
36 studies of incidental and untreated intracranial meningioma, through trial registry searches and two systematic  
37 literature reviews.
- 38 2. Identify unique patient-reported and neurocognitive outcomes from existing systematic literature reviews (that  
39 are not identified through our own searches), and patient-centred outcomes identified from published, semi-  
40 structured interviews with meningioma patients, to supplement the two long-lists of outcomes accordingly.
- 41 3. Recruit patients with an intracranial meningioma, healthcare professionals, researchers & other key stakeholders  
42 in caring or supporting roles to one of, or both, 2-round, international, modified eDelphi surveys to reduce long-  
43 lists of potentially relevant unique outcomes.
- 44 4. Conduct two independent, one-day, international, multi-stakeholder consensus meetings to ratify the COSMIC:  
45 Intervention and COSMIC: Observation COS.  
46  
47  
48  
49  
50  
51  
52  
53  
54  
55  
56  
57  
58  
59  
60

- 1  
2  
3  
4  
5  
6  
7  
8  
9
5. Make freely available and disseminate widely, a COS for use in all future intracranial meningioma clinical effectiveness trials, and a COS for use in all future clinical studies of incidental and untreated intracranial meningioma.

### 10 11 12 13 14 15 16 17 18 19 20 21 22 23 24 25 26 27 28 29 30 31 32 33 34 35 36 37 38 39 40 41 42 43 44 45 46 47

**Scope of the COS**

For a COS to be selected and utilised by clinical triallists, the scope must be clear (research or practice setting(s) in which the COS is to be applied, and the health condition(s), populations(s), and intervention(s) covered by the COS). A COS with a broad scope may lack relevance for heterogeneous disease entities, but a too narrow scope and it may never be used. Core Outcome Set Standards for Development (COS-STAD) recommendations have been described; the product of an international consensus process involving experienced COS developers.[21] The purpose of these 11 minimum standards is to facilitate COS development by providing a framework to consider when project planning.

Such is the importance of scope for the successful development and uptake of a COS, that The COSMIC Project encompasses the development of two distinct COS for the same health condition. The scope of both COS is defined within the 11 minimum COS-STAD recommendations (Table 1). In summary, the COSMIC: Intervention COS will be developed for use in phase 2 and later, intracranial meningioma, clinical effectiveness trials in adults, that are designed to inform clinical decision making and improve clinical care for patients. The COS will be applicable to all interventions utilised to treat the disease including surgical resection, radiotherapy, stereotactic radiosurgery, pharmacotherapy, perioperative care, and supportive treatments; any of which may be used in isolation or in combination. Conversely, the COSMIC: Observation COS will be developed for use in observational clinical studies of incidental and untreated intracranial meningioma, that are designed to inform monitoring and decision to treat strategies.

### 48 49 50 51 52 53 54 55 56 57 58 59 60

**Registration**

The study is registered with the Core Outcome Measures in Effectiveness Trials database as study 1508 accessible at (<https://www.comet-initiative.org/Studies/Details/1508>). This study has University of Liverpool Sponsorship and ethical approval (Ref UoL001601).

| Domain                | Standard | Methodology                                                                                 | COSMIC: Intervention                                                                                                                                                                                                                                                                                       | COSMIC: Observation                                                                                                                                                                                                                                                                                                                      |
|-----------------------|----------|---------------------------------------------------------------------------------------------|------------------------------------------------------------------------------------------------------------------------------------------------------------------------------------------------------------------------------------------------------------------------------------------------------------|------------------------------------------------------------------------------------------------------------------------------------------------------------------------------------------------------------------------------------------------------------------------------------------------------------------------------------------|
| Scope specification   | 1        | The research or practice setting(s) in which the COS is to be applied                       | Later phase clinical effectiveness trials that will inform clinical decision making.                                                                                                                                                                                                                       | Clinical studies of incidental and untreated intracranial meningioma that will inform clinical decision making.                                                                                                                                                                                                                          |
|                       | 2        | The health condition(s) covered by the COS                                                  | Treated intracranial meningioma.                                                                                                                                                                                                                                                                           | Incidental and untreated intracranial meningioma.                                                                                                                                                                                                                                                                                        |
|                       | 3        | The population(s) covered by the COS                                                        | Human adults aged 18 or above.                                                                                                                                                                                                                                                                             | Human adults aged 18 or above.                                                                                                                                                                                                                                                                                                           |
|                       | 4        | The intervention(s) covered by the COS                                                      | Interventions including surgical resection, radiotherapy, stereotactic radiosurgery, chemotherapy, perioperative care and supportive treatments; any of which may be in isolation or in combination with each other.                                                                                       | Active monitoring only as an intervention, but not treatment for an intracranial meningioma.                                                                                                                                                                                                                                             |
| Stakeholders involved | 5        | Those who will use the COS in research                                                      | Clinical trialists who manage patients with intracranial meningioma. They are included in standard 6.                                                                                                                                                                                                      | Clinical trialists who manage patients with intracranial meningioma. They are included in standard 6.                                                                                                                                                                                                                                    |
|                       | 6        | Healthcare professionals with experience of patients with the condition                     | This will include clinicians from multiple subspecialties and non-clinician healthcare professionals with active involvement in the care of patients with intracranial meningioma.                                                                                                                         | This will include clinicians from multiple subspecialties and non-clinician healthcare professionals with active involvement in the care of patients with intracranial meningioma.                                                                                                                                                       |
|                       | 7        | Patients with the condition or their representatives                                        | Patients with a diagnosis of intracranial meningioma who have received treatment will be included, along with relatives and carers of such patients.                                                                                                                                                       | Patients with a diagnosis of incidental intracranial meningioma who have not received treatment will be included, along with relatives and carers of such patients.                                                                                                                                                                      |
| Consensus process     | 8        | The initial list of outcomes considered both healthcare professionals' and patients' views. | A trial registry search and systematic literature review of intracranial meningioma trial outcomes will consider healthcare professionals' views, whilst a published systematic review of patient-reported outcomes, and published semi-structured interviews with patients will consider patients' views. | A trial registry search and systematic literature review of clinical studies of incidental and untreated intracranial meningioma will consider healthcare professionals' views, whilst a published systematic review of patient-reported outcomes, and published semi-structured interviews with patients will consider patients' views. |
|                       | 9        | A scoring process and consensus definition were described a priori.                         | Described in the 'scoring' and 'Analysis' section of this protocol.                                                                                                                                                                                                                                        | Described in the 'scoring' and 'Analysis' section of this protocol.                                                                                                                                                                                                                                                                      |
|                       | 10       | Criteria for including/dropping/adding outcomes were described a priori.                    | Described in the 'Analysis' section of this protocol.                                                                                                                                                                                                                                                      | Described in the 'Analysis' section of this protocol.                                                                                                                                                                                                                                                                                    |
|                       | 11       | Care was taken to avoid ambiguity of language used in the list of outcomes.                 | Both study content and study materials will utilise plain language summaries and clinical explanations where necessary. All materials will be reviewed with Patient Research Partners and pilot tested with patients and healthcare professionals.                                                         | Both study content and study materials will utilise plain language summaries and clinical explanations where necessary. All materials will be reviewed with Patient Research Partners and pilot tested with patients and healthcare professionals.                                                                                       |

Table 1 - Core Outcome Set Standards for Development recommendations as applied to both COSMIC: Intervention and COSMIC: Observation COS.

## Methods and Analysis

Development of the COSMIC: Intervention and COSMIC: Observation COS consists of two distinct phases:

Phase 1 concerns the generation of two long-lists of unique outcomes that are potentially relevant to key stakeholders.

The long-lists will be generated by extracting outcomes measured and reported in ongoing and published intracranial meningioma clinical effectiveness trials and clinical studies of incidental and untreated intracranial meningioma. Ongoing studies will be identified from trial registry searches, whilst published studies will be identified from systematic reviews of the literature. There may exist patient-reported and neurocognitive outcomes that are potentially relevant to participants from key stakeholder group of both COSMIC: Intervention and COSMIC: Observation, that have not been measured and reported in ongoing or published clinical trials and studies. Therefore, the long-lists of outcomes will be supplemented with additional, unique, patient-reported and neurocognitive outcomes identified from two existing systematic literature reviews where applicable. Finally, unique, patient-centred outcomes from published semi-structured interviews with patients who have a diagnosis of intracranial meningioma will complete the long-list, again where applicable.

Phase 2 concerns the prioritisation of the unique outcome long-lists in phase 1. Two, 2-round, international, multi-stakeholder, eDelphi surveys will be administered, to achieve a degree of consensus on which unique outcomes should be included or excluded in the final COSMIC: Intervention and COSMIC: Observation COS, according to pre-set criteria. Those unique outcomes without a conclusive consensus decision will be discussed in one of two consensus group meetings to ratify the final COSMIC: Intervention and COSMIC: Observation COS. A study flow-chart summarises the key steps of this project (Figure 1).

## Phase 1 – Generation of two long-lists of outcomes, of potential relevance to key stakeholder groups

The purpose of phase 1 is to generate two long-lists of unique outcomes that are of potential relevance to key stakeholders, measured and reported in ongoing and published intracranial meningioma clinical effectiveness trials and clinical studies of incidental and untreated intracranial meningioma. The long-lists will be supplemented with additional, unique patient-reported, neurocognitive, and patient-centred outcomes identified from the literature, where applicable.

### *Trial registry search and systematic review of the literature to identify ongoing and published intracranial meningioma clinical effectiveness trials*

#### *Research question:*

What outcomes are measured and reported in ongoing and published clinical trials assessing the effectiveness of interventions including surgery, radiotherapy, stereotactic radiosurgery, pharmacotherapy, perioperative care, and supportive treatments, used in isolation or in combination for adult intracranial meningioma?

#### *Types of studies:*

This systematic review of the literature will identify published full-texts that describe phase 2, 3, and 4 clinical trials (including single-arm studies) that assess the effectiveness of an intervention for patients with an intracranial meningioma. Articles will be required to describe trial results and have a minimum of 20 adult intracranial meningioma patients. If multiple publications exist in relation to an individual study, for example an interim analysis of a clinical trial, final results, as well as an additional prognostic paper, then the publications will be considered together as one study, and repetition of data extraction would not be performed. A second source of information will be used to identify ongoing trials. To do so, online international trial registries will be searched. Only online trial registry entries and published trials written in the English language will be included, due to resource limitations.

#### *Types of interventions:*

Eligible interventions include the full breadth investigated in intracranial meningioma clinical effectiveness trials. Broadly speaking, this will include surgical interventions (including modified techniques, approaches, and adjuncts), fractionated radiotherapy (in any form including conformal three-dimensional and intensity-modulated radiotherapy),



1 stereotactic radiosurgery (single fraction, hypofractionated or fractionated), pharmacotherapy (whereby the  
2 investigators include outcomes related to the effectiveness of the drug, and not simply the tolerability of the drug),  
3 perioperative care (including medical therapies, anaesthetic considerations, and general aspects of the care of patients  
4 with intracranial meningioma in and around the time of treatment), and supportive treatments (for example  
5 neurorehabilitation and ongoing medical therapies for symptom control). Studies will be included if they investigate an  
6 intervention in isolation or in any combination e.g. surgical resection plus a specific radiotherapy and/or chemotherapy  
7 regime.

#### 17 *Types of participants:*

18 Participants will comprise adults (18 years and above) of either sex, with a diagnosis of intracranial meningioma. The  
19 diagnosis need not be made histopathologically, as participants may potentially be recruited into trials based on a  
20 radiological diagnosis of an intracranial meningioma.

#### 27 *Exclusion criteria:*

28 We will not include clinical efficacy studies, or studies of a purely experimental nature, e.g. exploratory studies to  
29 identify biomarkers. Some studies identify themselves as combined phases, for instance Phase 0/2, Phase 1/2. These  
30 studies will be evaluated and discussed between members of the study advisory group (SAG) to establish where the  
31 focus of the work sits. Studies with a primarily Phase 0 or 1 component will be excluded. Case studies and case series  
32 (with fewer than 20 participants) will be excluded. Meningioma within the spinal column are outside the scope of this  
33 project and will be excluded. Studies investigating meningioma secondary to radiation (e.g. administered in childhood  
34 as an intervention for cancer) will not be included as this could be considered a different disease entity which may  
35 generate outcomes not relevant to the wider population of patients with intracranial meningioma. Similarly, studies  
36 investigating meningioma only in patients with the genetic condition Neurofibromatosis type 2 (NF2) would not be  
37 included as again, this can be considered a different disease entity. Studies with a mix of brain tumour types and at least  
38 20 patients with an intracranial meningioma would be included however.

#### 55 *Search strategy:*

56 A detailed search strategy utilising the search strings 'meningioma' AND 'trial' will be developed and translated to  
57 interrogate the following electronic bibliographic databases: PubMed, EMBASE, MEDLINE, CINAHL via EBSCO,

1 and Web of Science. In addition, a simple search of the following trial registries will be conducted: ClinicalTrials.gov,  
2 Cochrane Central Register of Controlled Trials, the WHO International Clinical Trials Registry Platform, and UK  
3 Clinical Trials Gateway. A detailed example of the search strategy to be used to interrogate the Medline database is  
4 provided in supplementary appendix 1. Prior to completing the review, the searches will be re-run to identify new  
5 records published since the original search.  
6  
7  
8  
9

#### 10 11 12 *Identification of eligible studies:*

13 Search results will be downloaded from their respective online databases, and uploaded to the online platform  
14 Rayyan.[22] Following deduplication, two review authors (CPM and SMK) will independently screen all titles and  
15 abstracts retrieved according to the in- and exclusion criteria. Screening will be performed on the Rayyan platform  
16 independently, with each review author blind to the screening choice of the other. Full-text copies of all titles which  
17 appear to meet the inclusion criteria will be obtained, but also titles where a decision cannot be confidently made based  
18 on title and abstract alone. The same two review authors will independently screen all full-text copies to assess for  
19 eligibility. A lack of agreement at screening or full-text eligibility check will initially be discussed between the two  
20 review authors and if agreement is not reached, the issue will be escalated to the senior review author (MDJ). The  
21 complete reference list of full-text titles included will be screened to identify titles not identified through the searches.  
22 In addition, trial registries will be searched independently by the same two reviewers implementing the same procedures  
23 to identify ongoing studies not yet published which describe outcomes that will be reported.  
24  
25  
26  
27  
28  
29  
30  
31  
32  
33  
34  
35  
36  
37  
38  
39

#### 40 ***Trial registry search and systematic review of the literature to identify ongoing and published clinical studies of*** 41 ***incidental and untreated intracranial meningioma*** 42 43 44 45

#### 46 *Research question:*

47 What outcomes are measured and reported in ongoing and published clinical studies describing cohorts of adults with  
48 incidental and untreated intracranial meningioma?  
49  
50  
51  
52  
53  
54

#### 55 *Types of studies:*

56 This systematic review of the literature will identify published full-texts that describe any cohort of adults with incidental  
57 and untreated intracranial meningioma, with a minimum of 20 patients. Studies are likely to be observational in design.  
58  
59  
60

1 If multiple publications exist in relation to an individual cohort, then the publications will be considered together as one  
2 study, and repetition of data extraction not performed. Again, a second source of information will be used to identify  
3 ongoing studies by searching online international trial registries. Only online trial registry entries and published studies  
4 written in the English language will be included, again due to resource limitations.  
5  
6  
7  
8  
9

#### 10 *Types of interventions:*

11 This systematic review is concerned with patients who have not received a treatment intervention, but have undergone  
12 active monitoring of an incidental intracranial meningioma. Studies will be included if they present outcomes for patient  
13 cohorts who have received a radiological diagnosis of an intracranial meningioma, but no treatment intervention. For  
14 the purposes of this review, active monitoring is therefore considered to be an intervention and may include clinical  
15 review (including history and clinical examination), testing (for instance, to obtain patient-reported, caregiver-reported,  
16 or performance outcomes), and imaging (using any modality and with any frequency).  
17  
18  
19  
20  
21  
22  
23  
24  
25  
26  
27

#### 28 *Types of participants:*

29 Participants will comprise adults (18 years and above) of either sex, with a radiological diagnosis of an intracranial  
30 meningioma.  
31  
32  
33  
34  
35

#### 36 *Exclusion criteria:*

37 Clinical studies with fewer than 20 participants will be excluded. Again, meningioma within the spinal column are  
38 outside the scope of this project and will be excluded, as will studies investigating meningioma secondary to radiation  
39 or in those with NF2.  
40  
41  
42  
43  
44  
45

#### 46 *Search strategy:*

47 A detailed search strategy utilising the search strings 'meningioma' AND 'incidental' OR 'untreated' will be developed  
48 and translated to interrogate the following electronic bibliographic databases: PubMed, EMBASE, MEDLINE,  
49 CINAHL via EBSCO, and Web of Science. Again, a simple search of the following trial registries will be conducted:  
50 ClinicalTrials.gov, Cochrane Central Register of Controlled Trials, the WHO International Clinical Trials Registry  
51 Platform, and UK Clinical Trials Gateway. Prior to completing the review, the searches will be re-run to identify new  
52 records published since the original search.  
53  
54  
55  
56  
57  
58  
59  
60

1  
2 *Identification of eligible studies:*  
3

4 Again, search results will be processed in the online platform Rayyan.[22] Following deduplication, two review authors  
5 (CPM and AII) will independently screen all titles and abstracts retrieved according to the in- and exclusion criteria.  
6  
7 Screening will be performed on the Rayyan platform independently, with each review author blind to the screening  
8  
9 choice of the other. Full-text copies of all titles which appear to meet the inclusion criteria will be obtained, but also  
10  
11 titles where a decision cannot be confidently made based on title and abstract alone. The same two review authors will  
12  
13 independently screen all full-text copies to assess for eligibility. A lack of agreement at screening or full-text eligibility  
14  
15 check will initially be discussed between the two review authors and if agreement is not reached, the issue will be  
16  
17 escalated to the senior review author (MDJ). The complete reference list of full-text titles included will be screened to  
18  
19 identify titles not identified through the searches. In addition, trial registries will be searched independently by the same  
20  
21 two reviewers implementing the same procedures to identify ongoing studies not yet published which describe outcomes  
22  
23 that will be reported.  
24  
25  
26  
27  
28  
29

30 ***Extraction of outcomes measured and reported in ongoing and published clinical studies***  
31

32  
33  
34 *Definition of an outcome:*  
35

36 A trial or study outcome (also called an event or endpoint) is a measurable variable examined in response to a treatment  
37  
38 or intervention. Active monitoring of an intracranial meningioma shall be considered an intervention. For the purposes  
39  
40 of this study, a trial outcome will be defined as ‘one that has original meaning and context’ and so different phrasing or  
41  
42 spelling of a word, or an idea that addresses the same concept will be categorised as one outcome.[23] This study is  
43  
44 therefore concerned with any measured and reported variable (trial/study outcome) that attempts to assess response or  
45  
46 condition. The U.S. Food & Drug Administration (FDA) describe four types of clinical outcome assessment (COA) that  
47  
48 may be reported, namely patient-reported (e.g., health-related quality of life), clinician-reported (e.g., adverse events),  
49  
50 observer-reported (e.g., input from informal caregivers on activities of daily living), or performance outcomes (e.g.,  
51  
52 neuropsychological tests). Other traditional outcomes of relevance include those that relate to progression (and its  
53  
54 measurement) and survival.  
55  
56  
57  
58

59 *Data extraction:*  
60

1 Data will be extracted from eligible articles and trial registry entries by a single review author (CPM) into one of two  
2 custom designed and piloted spreadsheets in Microsoft Excel (v16.34, Microsoft, Washington, DC, USA) following  
3 best practice described by COMET.[19, 20] The first 10% of included titles will be dual extracted by a second review  
4 author to assess for consistency and accuracy of extraction (COSMIC: Intervention – SMK, COSMIC: Observation -  
5 AII). If differences exist in the data extracted by the two review authors, this will be discussed, resolved, and a further  
6 10% will be extracted until concordance is established. If disagreements cannot be resolved, these will be escalated to  
7 the senior review author (MDJ).  
8  
9  
10  
11  
12  
13  
14  
15  
16

17 The following data will be extracted from each study as recommended by COMET:[19, 20] study type, study population,  
18 first author, year and journal of publication, intervention(s) under investigation, each outcome reported (recorded  
19 verbatim) from the study abstract, methods, or results, the definition of the outcome, whether outcome is a primary or  
20 secondary outcome, the indicator and/or tool(s) used to operationalize or measure the outcome, and the time points or  
21 time-period at which the outcome was measured. The number of verbatim outcomes per trial/study will be recorded.  
22  
23  
24  
25  
26  
27  
28  
29

30 Matching outcomes that have been measured at multiple time-points will not be recorded as different outcomes. As  
31 previously described, eligible articles that relate to an individual study will be considered together as one study. For  
32 example, an outcome measured and reported in exactly the same way in both an interim analysis and final results report  
33 would only be extracted once in relation to that study. If a new outcome was measured and reported in the final results  
34 report, this would be considered a new outcome and extracted in addition to all outcomes in the interim analysis.  
35  
36  
37  
38  
39  
40  
41

#### 42 *Data analysis:*

43  
44 Tabulation and descriptive data analysis will be performed in Microsoft Excel (v16.34, Microsoft, Washington, DC,  
45 USA) with the aim of deduplicating outcomes to generate two lists of unique outcomes reported across the breadth of  
46 studies identified. Given that there exists considerable heterogeneity in the definition of what constitutes a unique  
47 outcome and the difficulties in prioritising and achieving consensus when similar outcomes are advanced, we describe  
48 our method of data analysis to demonstrate outcome heterogeneity reporting as per Young et al.,[23] and classify  
49 outcomes according to the outcome framework proposed by COMET.[19, 24]  
50  
51  
52  
53  
54  
55  
56  
57  
58  
59  
60

1 For patient-reported outcome measures (PROMs), content analysis will be performed according to the method described  
2 by Macefield et al.[25] For each PROM identified, the PROM development paper will be identified and reviewed in  
3 order to establish whether or not the PROM is validated for use in meningioma. Frequency of use of a PROM and the  
4 studies utilising it will be listed. The number of single and multi-item scales for each PROM will be recorded. For each  
5 single- or multi-item PROM scale; verbatim scale name, verbatim scale component name, and verbatim scale component  
6 or single item description will be recorded. Verbatim scale component and single item descriptions will be classified  
7 according to the COMET taxonomy into core areas and outcome domains, followed by a subdomain category.[24] This  
8 process will be reviewed by members of the SAG to ensure rigorous and consistent application of the classification  
9 system.

### 21 ***Creation of two unique long-lists of outcomes potentially relevant to stakeholder groups of COSMIC: Intervention*** 22 ***and COSMIC: Observation***

23 Outcomes extracted in relation to intracranial meningioma clinical effectiveness trials will be used to generate the long-  
24 list for the COSMIC: Intervention eDelphi survey, whilst outcomes extracted in relation to clinical studies of incidental  
25 and untreated intracranial meningioma will be used to generate the long-list for the COSMIC: Observation eDelphi  
26 survey. Within each long list, exact matching outcomes will be deduplicated. Those outcomes that remain will be  
27 grouped for further deduplication when similarities in spelling, meaning, or context are judged to exist. For instance,  
28 the outcomes 'seizure' and 'fit' may be considered synonymous and could therefore be deduplicated to 'seizure'. This  
29 process will reduce the long-list to one that contains 'unique' outcomes measured and reported in trials and studies.  
30 Whilst the two long-lists remain separate, the SAG will review both long-lists to ensure that a consistent approach is  
31 applied to both. For instance, if the outcomes 'seizure' and 'fit' are within both long-lists, and the outcome was  
32 deduplicated to 'seizure', this term would be selected for both long-lists.

33 There may be patient-reported and neurocognitive outcomes that are of potential relevance to stakeholder groups that  
34 are not identified following our trial registry searches and systematic reviews of the literature. A systematic review of  
35 patient-reported outcomes in clinical studies of intracranial meningioma has recently been completed (S.M. Keshwara.  
36 Personal Communication). Should this systematic review identify outcomes and outcome measures that have not already  
37 been identified, content analysis would be performed, in order to identify additional unique outcomes that can be added  
38  
39  
40  
41  
42  
43  
44  
45  
46  
47  
48  
49  
50  
51  
52  
53  
54  
55  
56  
57  
58  
59  
60

1 to either or both long-lists of unique outcomes. Similarly, a systematic review of cognitive impairment after treatment  
2 for meningioma may provide additional, unique neurocognitive outcomes that could also be added to the long-lists.[26]  
3  
4  
5

6 The COSMIC project does not include primary, semi-structured interviews with patients with an intracranial  
7 meningioma. However, patient-centred outcomes have been reported in published, semi-structured interviews  
8 conducted with intracranial meningioma patients that explored the relevance of issues, and issues not addressed, in  
9 existing health-related quality of life questionnaires.[27] Additional, unique patient-centred outcomes identified from  
10 this source will also supplement the two long-lists where applicable.  
11  
12  
13  
14  
15  
16  
17  
18

19 The data that describes 'how' and 'when' each extracted outcome is measured will be used for subsequent COS work  
20 to inform 'how' and 'when' the outcomes constituting both COS could be measured. The review will be reported in  
21 accordance with the Preferred Reporting Items for Systematic Reviews and Meta-analysis (PRISMA) guidelines where  
22 applicable,[28] which for the purposes of this study would exclude the following items (11, 12, 13e, 13f, 14, 15, 18, 19,  
23 20, 21, 22).  
24  
25  
26  
27  
28  
29  
30  
31  
32  
33  
34  
35  
36  
37  
38  
39  
40  
41  
42  
43  
44  
45  
46  
47  
48  
49  
50  
51  
52  
53  
54  
55  
56  
57  
58  
59  
60

## Phase 2 – Outcome consolidation and consensus building

Phase 2 incorporates key stakeholders into The COSMIC Project which includes patients with lived experience of intracranial meningioma, along with other key stakeholder groups. The aim of phase 2 is to firstly reduce the two long-lists of unique outcomes from phase 1 by the use of two modified eDelphi surveys, and then to ratify the final COSMIC: Intervention and COSMIC: Observation COS at two independent, one-day consensus meetings.[29]

### *eDelphi surveys*

The eDelphi surveys will adhere to the standards described by COMET [19]. Each unique outcome will be ascribed a lay definition and included in the eDelphi survey. The final long-lists of unique, COMET classified outcomes with associated lay definitions will be reviewed by the study patient research partners (PRPs) to ensure there is clarity of meaning, a lack of replication of outcomes within each list, and lists which are acceptable to patient participants with respect to length.[30]

### *Research question:*

Which outcomes do patients with an intracranial meningioma, healthcare professionals, researchers and other key stakeholders believe should be included in a COS for use in future meningioma clinical effectiveness trials and in a COS for use in future clinical studies of untreated intracranial meningioma?

### *Methods:*

Key stakeholders, including patients with a radiological or histological diagnosis of intracranial meningioma will be invited to participate in one or both of the eDelphi surveys. The eDelphi surveys will utilise a ‘modified’ approach [31] as opposed to a ‘traditional’ approach,[32] whereby the outcomes obtained from phase 1 of the study are presented in the first round of the eDelphi surveys for rating. The first round of the eDelphi surveys will also offer the opportunity for participants to suggest outcomes that have not been presented. These outcomes would not be scored but will be reviewed prior to the second round of the eDelphi surveys by the SAG and considered for inclusion in the second round, should the outcome be judged as unique and appropriate. Two rounds will be utilised to reduce attrition bias, along with two panels (Panel 1 - Healthcare professionals and researchers, Panel 2 - Patients and relatives/patient support roles).[33]



Participant level data will be pseudo-anonymised. A participant's identity is not revealed, and responses made by an individual participant are not identifiable.

#### *Inclusion criteria:*

Participants will be recruited to phase 2 of the study from three key stakeholder groups: healthcare professionals and researchers who will use the COS, patients with a radiological or histological diagnosis of intracranial meningioma, and other stakeholders in a caring or supporting role to a patient with an intracranial meningioma. All participants must be over the age of 18 and able to complete the online survey/s in English.

#### Meningioma patients

Patients who have completed or are receiving treatment for an intracranial meningioma with surgery, radiotherapy, stereotactic radiosurgery or pharmacotherapy, either in isolation or in combination are eligible to participate in the COSMIC: Intervention eDelphi survey only. Patients who have not received treatment for a radiologically diagnosed intracranial meningioma are eligible to participate in the COSMIC: Observation eDelphi survey only.

#### Healthcare professionals and researchers

Any member of the clinical team directly responsible for the care of patients with a meningioma. The neuro-oncology multi-disciplinary team (MDT; also known as the 'tumour board' in other countries) consists of the following roles who are all eligible to participate: neurosurgeons and ear, nose, and throat surgeons who operate on meningiomas, neuro-oncology specialist nurses, radiation oncologists, medical oncologists, neurologists, neuropathologists, and neuroradiologists. Whilst it is anticipated that the majority of researchers likely to use both COS will also be healthcare professionals directly involved in the care of patients with a meningioma, those not directly involved in care but who are likely to use the COS will also be eligible to participate (e.g. neuropsychologist or epidemiologist). Healthcare professionals are eligible and will be encouraged to participate in both eDelphi surveys.

#### Caring or supporting roles

Individuals who provide a regular and involved caring or supporting role to a patient with a meningioma will be eligible to participate, including the following: primary carers, family members, and charity/support group representatives as these participants will likely offer a different but important perspective on outcomes that matter to meningioma patients.

1 Individuals in a caring or supporting role are eligible to participate in one or both eDelphi surveys dependent upon the  
2 individual participants experience. For instance, a relative in a supporting role to a patient with an incidental and  
3 untreated meningioma would only be eligible to participate in COSMIC: Observation. However, a charity support  
4 worker who has provided input to both patients who have received treatment, and patients who have not, would be  
5 eligible and encouraged to participate in the eDelphi surveys for both COSMIC: Intervention and COSMIC:  
6 Observation.  
7  
8  
9  
10  
11  
12  
13  
14

#### 15 *Sampling and recruitment:*

##### 17 Healthcare professionals

18 Healthcare professional participants (Board certified or equivalent) will be recruited locally, nationally and  
19 internationally. The main study site (The Walton Centre NHS Foundation Trust) has a weekly neuro-oncology MDT  
20 meeting which will be contacted to recruit local healthcare professional participants. Neuro-oncology multidisciplinary  
21 teams or similar will be contacted at all other UK neurosurgical centres to maximise national recruitment. Where  
22 personal contacts of the study advisory group exist, these will also be utilised. National recruitment will also be sought  
23 by advertisement through national professional societies, including the British-Irish Meningioma Society (BIMS), the  
24 British Neuro-Oncology Society (BNOS), the Society of British Neurological Surgeons (SBNS), and the British Skull  
25 Base Society (BSBS).  
26  
27  
28  
29  
30  
31  
32  
33  
34  
35  
36  
37

38 International recruitment of healthcare professional participants will be driven again by personal contacts of the study  
39 advisory group, but also through a number of international professional societies, including the European Organisation  
40 for Research and Treatment of Cancer Brain Tumour Group (EORTC BTG), the European Association of Neuro-  
41 Oncology (EANO), the International Consortium on Meningioma (ICOM), the Response Assessment in Neuro-  
42 Oncology Patient-Reported Outcome Group (RANO-PRO), and the Society for Neuro-Oncology (SNO). Key  
43 international collaborators will be asked to distribute the recruitment email within their own neuro-oncology MDT or  
44 tumour board to maximise healthcare professional recruitment. To promote participation by healthcare professionals at  
45 the forefront of meningioma clinical research, the chief investigators of published trials and studies conducted in more  
46 recent years that are identified through the systematic review, along with the chief investigators of ongoing clinical trials  
47 and studies will also be contacted and invited to participate.  
48  
49  
50  
51  
52  
53  
54  
55  
56  
57  
58  
59  
60

### Patients and those in caring or supporting roles

1  
2 Patients will be invited to participate in this study through charities, support groups, and social media platforms/forums.  
3  
4 Charities and support groups will be contacted and a named contact for each will be sourced. This contact will circulate  
5  
6 the participant invitation email, which will include a link to the study website (thecosmicproject.org) and the online  
7  
8 DelphiManager platform. We will encourage named contacts to share recruitment details on social media, in order to  
9  
10 recruit participants who may not be on a charity or support group mailing list, but who may interact with a social media  
11  
12 account of the same organisation. The International Brain Tumour Alliance (IBTA), The Brain Tumour Charity (TBTC),  
13  
14 Brainstrust – the brain cancer people, and the Brain Tumour Foundation of Canada will all likely contribute the majority  
15  
16 of opportunities to recruit patient participants as they each maintain a database of patients with intracranial meningioma.  
17  
18 Study social media accounts will also be created to interact directly with potential participants and thereby increase  
19  
20 patient participant recruitment.  
21  
22  
23  
24

### *Sample size:*

25  
26  
27 No specific requirements exist for the minimum number of participants to be included in an eDelphi survey in order to  
28  
29 gain consensus,[34] but it is generally considered that having more participants increases the reliability of the groups  
30  
31 judgement.[35] However, for the purposes of this study, a minimum of 20 participants will be required for each panel  
32  
33 of the eDelphi surveys (Panel 1 - Healthcare professionals, Panel 2 - Patients and those in caring or supporting roles).  
34  
35 We will not limit the number of participants who may wish to register to complete the eDelphi surveys. However, study  
36  
37 registration after closure of round 1 of the eDelphi surveys will not be permitted.  
38  
39  
40  
41

### *Registration:*

42  
43  
44 The study website (thecosmicproject.org) will contain all necessary information about the study. Registration to  
45  
46 participate as an individual from any stakeholder group will only be possible via the online DelphiManager platform.  
47  
48 This is accessed through an emailed link or through the study website. On attempting to register, a number of screening  
49  
50 questions will be asked. Firstly, registering participants will be asked to identify to which stakeholder group they belong  
51  
52 (healthcare professional and/or researcher, patient with a meningioma, primary carer, family member, charity/support  
53  
54 group representatives, or other stakeholder with a supporting role). Further screening questions will ensure the eligibility  
55  
56 criteria are met within each stakeholder group as previously described. Specific information will then be collected  
57  
58 depending on the stakeholder group chosen.  
59  
60

1  
2 For healthcare professionals, job role will be identified (categorised) along with years in practice (categorised). Country  
3 of clinical practice will be recorded to analyse the international contribution of healthcare professionals, including  
4 differences in outcome scoring by continent or region. This could have implications for dissemination of the final COS.  
5  
6  
7  
8

9  
10 For patients with an intracranial meningioma (all of which rely on a self-reported diagnosis), baseline demographics  
11 will be recorded in order to ensure the patient cohort is representative of the demography of this disease (age, sex). The  
12 number of years since diagnosis (categorised) will be requested to analyse whether this variable affects the scoring of  
13 outcomes. Finally, the level of treatment will be recorded for instance (incidental/untreated, surgical intervention only,  
14 radiotherapy or stereotactic radiosurgery only, or a combination of surgery and radiotherapy or stereotactic radiosurgery)  
15 and number of years since diagnosis and treatment (categorised). The response to the level of treatment question will  
16 determine which eDelphi survey the patient will be encouraged to complete.  
17  
18  
19  
20  
21  
22  
23  
24  
25

26  
27 For patients, three further pieces of information will be obtained in order to evaluate methods and motivations for  
28 registration for studies such as this. These will include a) the format by which recruitment was achieved, b) the principal  
29 motivator for registration, and c) the most important factors within the recruitment advert for initiating registration. This  
30 data will subsequently be used to analyse and draw conclusions on how best to recruit to eDelphi surveys in the future.  
31  
32  
33  
34  
35  
36  
37

38 For carers or those in a supporting role to patients with a diagnosis of intracranial meningioma, baseline demographics  
39 will be recorded in order to evaluate if differences affect the scoring of outcomes (age, sex). The specific role will be  
40 requested (categorised). Whether the role relates to patients with incidental and untreated or treated intracranial  
41 meningioma will be requested and this response will determine if the participant will be encouraged to complete one of,  
42 or both eDelphi surveys. The number of years in this role (categorised) will also be requested to analyse whether this  
43 variable affects the scoring of outcomes.  
44  
45  
46  
47  
48  
49  
50

51  
52  
53 *Consent:*

54  
55 Consent to participate in the eDelphi survey/s will be obtained as eConsent by all participants at the point of registration.  
56 A participant information leaflet will be provided in webpage format and for download from the study website, as well  
57 as an email attachment to accompany e-invitations. Sufficient time will be available for participants to choose to partake  
58  
59  
60

1 in this study prior to closure of the first round of the eDelphi surveys. Similarly, consent to participate in the consensus  
2 meeting will be obtained as eConsent by all participants prior to the consensus meetings. A participant information  
3 leaflet will again be provided in the same manner.  
4  
5  
6  
7

#### 8 *Surveys:*

9  
10 The two eDelphi surveys will be constructed and delivered through the online DelphiManager platform. The software  
11 was developed by the COMET initiative for this specific purpose. The eDelphi surveys be piloted with members of the  
12 SAG including patient research partners and lay contributors. At the beginning of the eDelphi survey, instructions will  
13 be provided on how to complete the survey. Plain language summaries and videos developed by the COMET 'Patient  
14 Participation, Involvement and engagement group' will be utilised during the registration and eDelphi administration  
15 process to facilitate understanding.  
16  
17  
18  
19  
20  
21  
22  
23  
24

25 Data collection will last for a period of 4 weeks for both rounds of both eDelphi surveys. Participants completing the  
26 COSMIC: Intervention and/or COSMIC: Observation eDelphi surveys will complete both first rounds consecutively.  
27 Reminders will be sent to participants who have not completed the survey/s following registration, and following a  
28 request to complete round two of the survey. Reminders will be sent 2-weeks, 1-week and 48 hours prior to closure of  
29 the surveys. Failure to complete the survey within the 4-week period would be recorded as a failure to complete that  
30 round of the eDelphi survey.  
31  
32  
33  
34  
35  
36  
37  
38  
39

#### 40 *Scoring:*

41  
42 Inclusion of an outcome in either the COSMIC: Intervention or COSMIC: Observation COS requires a majority  
43 agreement from both panels, of its critical importance.[36] During round 1 of the eDelphi surveys, participants will rate  
44 the importance of each outcome presented using the 9-point Likert scale. It shall be explained to participants that the  
45 following scores represent outcome importance, whereby (1-3) is of limited importance, (4-6) is important but not  
46 critical, and (7-9) is critically important. Previous studies have demonstrated that a 9-point scale provides adequate  
47 discrimination, does not overburden, and is suitable when a subsequent eDelphi round or consensus meeting will take  
48 place.[19, 34, 37, 38] Outcomes will be grouped by domain so that similar outcomes are viewed together. Lay terms  
49 and definitions will be used with medical terms given in brackets (utilising patient research partner review). Ordering  
50 of grouped outcomes will be randomised to prevent question order from impacting the results.[39]  
51  
52  
53  
54  
55  
56  
57  
58  
59  
60

1 All items from round 1 will be carried forward to the second round of each eDelphi survey. In the second round of the  
2 eDelphi surveys, the round one response from each of the two panels will be presented separately for each outcome.  
3  
4 This method facilitates consensus building by allowing participants to consider the aggregate responses of their own,  
5 and the alternative panel.[40-42] Participants will again rate on a 9-point Likert scale. A change in score will prompt  
6  
7 the participant to be offered the chance to explain their reasoning, but this is not mandatory. At each round of the eDelphi  
8  
9 surveys and at the consensus meetings, data will be recorded on number of participants invited, number completing the  
10  
11 study section, and the measure of response to each outcome. The results of the second round of each eDelphi survey  
12  
13 will be used to determine what outcomes are dropped and what outcomes are included in the final COSMIC: Intervention  
14  
15 and COSMIC: observation COS, or discussed at the relevant consensus meeting if undecided.  
16  
17  
18  
19  
20

#### 21 *Analysis:*

22  
23 The definition of consensus which will include an outcome (consensus-in) beyond round 2 of the eDelphi surveys and  
24 during the consensus meetings is 80% or more of participants from both panels scoring an outcome as critical (7-9).  
25  
26 Should an outcome be rated as critical by only 50% or less of participants from both panels, the outcome would be  
27  
28 dropped (consensus-out). Outcomes to be discussed and voted on at the consensus meetings will be those that are neither  
29  
30 included or dropped. The same definition of consensus will apply. All participants who complete both rounds of an  
31  
32 eDelphi survey will be eligible to take part in the consensus meeting associated with that eDelphi survey. Participants  
33  
34 eligible to complete both eDelphi surveys, who subsequently complete both rounds of both eDelphi surveys, will be  
35  
36 eligible to take part in both consensus meetings.  
37  
38  
39  
40  
41

#### 42 *Attrition between rounds:*

43  
44 Whilst we endeavour to retain as many participants as possible between rounds 1 and 2 of the eDelphi surveys, it is  
45  
46 expected that a proportion will not complete the second round. The attrition rate will be calculated between rounds. In  
47  
48 order to assess for attrition bias, the mean round 1 scores for the participants completing both rounds of an eDelphi will  
49  
50 be compared with those that only complete the first round. The importance of completing both rounds will be  
51  
52 emphasised. This will be recorded and analysed to compare views of those completing 1 vs 2 rounds and discussed at  
53  
54 the consensus meeting.  
55  
56  
57  
58  
59  
60

## ***Consensus meetings***

### *Research question:*

Can two COS be ratified for subsequent use in clinical effectiveness trials for patients with intracranial meningioma and clinical studies of incidental and untreated intracranial meningioma?

### *Methods:*

Two independent consensus meetings will take place on two separate days. During each consensus meeting, outcomes categorised as 'consensus-in' and 'consensus-out' across all stakeholder groups will be reviewed. The primary focus of each meeting will be to discuss those outcomes without consensus. These outcomes will be presented for discussion amongst stakeholder representatives from both eDelphi survey panels and voted on in order to achieve consensus.

### *Sampling and recruitment:*

During registration for the eDelphi surveys, participants will be informed of, and asked if they would like to be considered for invitation to either one or both consensus meetings (where eligible). To be eligible, it will be mandatory that both rounds of the appropriate eDelphi survey/s are completed. Forty participants will be invited from the UK and internationally. We will apply stratified purposive sampling, based on the judgement of the SAG to select attendees in order to balance stakeholders' specialities, participant's disease severity and level of intervention where applicable.

### *Scoring and analysis:*

After each round of discussion, confidential electronic voting will take place involving all consensus meeting participants. Participants will again be required to vote on a 9-point Likert scale. The same consensus criteria applied after round 2 of the eDelphi surveys will also be applied at the consensus meetings. This will include the requirement that participants from both panels are in independent agreement. Only those outcomes that achieve 'consensus-in' will be included in the COSMIC: Intervention or COSMIC: Observation COS. Should either consensus meeting not achieve ratification of a COS, a further meeting would be arranged to achieve this.

### ***Patient and Public Involvement***

1  
2 The SAG was formed to guide the management of The COSMIC Project. The SAG is formed from key stakeholder  
3  
4 representatives. The purpose of the SAG is to ensure the aims of the study are delivered at all stages. This is achieved  
5  
6 by obtaining feedback on proposed study methodology, delivery, and research output.  
7  
8  
9

10  
11 The patient research partner (PRP) team at The Brain Tumour Charity were contacted to identify potential PRPs. One  
12  
13 patient volunteered to join the SAG and has been involved in the design of this study. A second PRP was put into contact  
14  
15 with the study management group by a member of the SAG. The scope of both COS has been decided with PRP input  
16  
17 and both PRPs have a critical role in delivering this study. One PRP has received treatment, while another has not. The  
18  
19 outcome long-lists will be reviewed by the PRPs for potential missing outcomes, as well as clarity, length and meaning  
20  
21 prior to commencement of the eDelphi surveys.[30] Two further PRPs will be recruited prior to commencement of the  
22  
23 eDelphi surveys to facilitate this specific aim. The eDelphi surveys will be pilot tested with the study PRPs. All materials  
24  
25 associated with this study will be reviewed for clarity and understanding, including recruitment materials, consent forms,  
26  
27 participant information leaflets, and the study website. The PRPs will be remunerated for their time. Dissemination  
28  
29 plans will be discussed and reviewed by the PRPs.  
30  
31  
32  
33  
34  
35  
36  
37  
38  
39  
40  
41  
42  
43  
44  
45  
46  
47  
48  
49  
50  
51  
52  
53  
54  
55  
56  
57  
58  
59  
60



## Results and Dissemination

The trial registry searches and systematic literature reviews will be published, as well as the final COSMIC: Intervention and COSMIC: Observation COS; and will be freely available. Results will be distributed to relevant professional organisations, as well as charity and support groups. National and international presentation of results will take place after ratification of both COS. This project will continue in order to define how and when each core outcome should be measured. Multiple organisations support the use of COS (NIHR Health Technology Assessment and WHO handbook for guideline development). The NIHR state in their application form 'where established core outcomes exist they should be included among the list of outcomes unless there is good reason to do otherwise'. This protocol adheres to the 13 minimum Core Outcome Set-Standardised Protocol Items (COS-STAP) recommendations.[43]

## References

1. Ostrom QT, Patil N, Cioffi G, *et al.* CBTRUS Statistical Report: Primary Brain and Other Central Nervous System Tumors Diagnosed in the United States in 2013–2017. *Neuro-Oncology*. 2020;22(Supplement\_1):iv1-iv96.
2. Louis DN, Perry A, Wesseling P, *et al.* The 2021 WHO Classification of Tumors of the Central Nervous System: a summary. *Neuro Oncol*. 2021.
3. Rogers L, Barani I, Chamberlain M, *et al.* Meningiomas: knowledge base, treatment outcomes, and uncertainties. A RANO review. *J Neurosurg*. 2015;122(1):4-23.
4. Goldbrunner R, Stavrinou P, Jenkinson MD, *et al.* EANO guideline on the diagnosis and management of meningiomas. *Neuro-Oncology*. 2021.
5. Goldbrunner R, Minniti G, Preusser M, *et al.* EANO guidelines for the diagnosis and treatment of meningiomas. *The Lancet Oncology*. 2016;17(9):e383-e91.
6. Islim AI, Mohan M, Moon RDC, *et al.* Incidental intracranial meningiomas: a systematic review and meta-analysis of prognostic factors and outcomes. *Journal of Neuro-Oncology*. 2019;142(2):211-21.
7. Behbahani M, Skeie GO, Eide GE, *et al.* A prospective study of the natural history of incidental meningioma—Hold your horses! *Neuro-Oncology Practice*. 2019;6(6):438-50.
8. Mohammad MH, Chavredakis E, Zakaria R, *et al.* A national survey of the management of patients with incidental meningioma in the United Kingdom. *British Journal of Neurosurgery*. 2017;31(4):459-63.
9. Rogers L, Zhang P, Vogelbaum MA, *et al.* Intermediate-risk meningioma: initial outcomes from NRG Oncology RTOG 0539. *J Neurosurg*. 2018;129(1):35-47.
10. Weber DC, Ares C, Villa S, *et al.* Adjuvant postoperative high-dose radiotherapy for atypical and malignant meningioma: A phase-II parallel non-randomized and observation study (EORTC 22042-26042). *Radiother Oncol*. 2018;128(2):260-5.
11. Preusser M, Silvani A, Rhun EL, *et al.* Trabectedin for recurrent WHO grade II or III meningioma: A randomized phase II study of the EORTC Brain Tumor Group (EORTC-1320-BTG). *Journal of Clinical Oncology*. 2019;37(15\_suppl):2007-.
12. Jenkinson MD, Javadpour M, Haylock BJ, *et al.* The ROAM/EORTC-1308 trial: Radiation versus Observation following surgical resection of Atypical Meningioma: study protocol for a randomised controlled trial. *Trials*. 2015;16:519.
13. Rogers L. Phase III Trial of Observation Versus Irradiation for a Gross Totally Resected Grade II Meningioma: NRGONCOLOGY; 2017 [Available from: <https://www.nrgoncology.org/Clinical-Trials/Protocol/nrg-bn003?filter=nrg-bn003>].
14. Brastianos P. Vismodegib and FAK Inhibitor GSK2256098 in Treating Patients With Progressive Meningiomas 2015 [Available from: <https://clinicaltrials.gov/ct2/show/study/NCT02523014>].
15. Jenkinson MD, Ali A, Islim AI, *et al.* Letter to the Editor. Establishing the role of prophylactic antiepileptic drugs in glioma and meningioma surgery. *J Neurosurg*. 2019;131(3):985-7.
16. Islim AI, Kolamunnage-Dona R, Mohan M, *et al.* A prognostic model to personalize monitoring regimes for patients with incidental asymptomatic meningiomas. *Neuro-Oncology*. 2019;22(2):278-89.
17. Eun Jung L, Jeong Hoon K, Eun Suk P, *et al.* A novel weighted scoring system for estimating the risk of rapid growth in untreated intracranial meningiomas. *Journal of Neurosurgery JNS*. 2017;127(5):971-80.
18. Jenkinson MD. 'Meningiomics'-an integration of data on the patient, tumour, extent of resection and molecular pathology to optimise the management and follow-up for meningiomas. *Acta Neurochir (Wien)*. 2019;161(12):2551-2.
19. Williamson PR, Altman DG, Bagley H, *et al.* The COMET Handbook: version 1.0. *Trials*. 2017;18(Suppl 3):280.
20. Williamson PR, Altman DG, Blazeby JM, *et al.* Developing core outcome sets for clinical trials: issues to consider. *Trials*. 2012;13:132.
21. Kirkham JJ, Davis K, Altman DG, *et al.* Core Outcome Set-STAndards for Development: The COS-STAD recommendations. *PLoS Med*. 2017;14(11):e1002447.

22. Ouzzani M, Hammady H, Fedorowicz Z, *et al.* Rayyan-a web and mobile app for systematic reviews. *Syst Rev.* 2016;5(1):210.
23. Young AE, Brookes ST, Avery KNL, *et al.* A systematic review of core outcome set development studies demonstrates difficulties in defining unique outcomes. *J Clin Epidemiol.* 2019;115:14-24.
24. Dodd S, Clarke M, Becker L, *et al.* A taxonomy has been developed for outcomes in medical research to help improve knowledge discovery. *J Clin Epidemiol.* 2018;96:84-92.
25. Macefield RC, Jacobs M, Korfage IJ, *et al.* Developing core outcomes sets: methods for identifying and including patient-reported outcomes (PROs). *Trials.* 2014;15:49.
26. Gondar R, Patet G, Schaller K, *et al.* Meningiomas and Cognitive Impairment after Treatment: A Systematic and Narrative Review. *Cancers.* 2021;13(8):1846.
27. Zamanipoor Najafabadi AH, Peeters MCM, Lobatto DJ, *et al.* Health-related quality of life of cranial WHO grade I meningioma patients: are current questionnaires relevant? *Acta Neurochir (Wien).* 2017;159(11):2149-59.
28. Page MJ, McKenzie JE, Bossuyt PM, *et al.* The PRISMA 2020 statement: an updated guideline for reporting systematic reviews. *BMJ.* 2021;372:n71.
29. Biggane AM, Brading L, Ravaud P, *et al.* Survey indicated that core outcome set development is increasingly including patients, being conducted internationally and using Delphi surveys. *Trials.* 2018;19(1):113.
30. Smith H, Horobin A, Fackrell K, *et al.* Defining and evaluating novel procedures for involving patients in Core Outcome Set research: creating a meaningful long list of candidate outcome domains. *Res Involv Engagem.* 2018;4:8.
31. Keeley T, Williamson P, Callery P, *et al.* The use of qualitative methods to inform Delphi surveys in core outcome set development. *Trials.* 2016;17(1):230.
32. Hasson F, Keeney S, McKenna H. Research guidelines for the Delphi survey technique. *J Adv Nurs.* 2000;32(4):1008-15.
33. Gargon E, Crew R, Burnside G, *et al.* Higher number of items associated with significantly lower response rates in COS Delphi surveys. *J Clin Epidemiol.* 2019;108:110-20.
34. Sinha IP, Smyth RL, Williamson PR. Using the Delphi technique to determine which outcomes to measure in clinical trials: recommendations for the future based on a systematic review of existing studies. *PLoS Med.* 2011;8(1):e1000393.
35. Murphy MK, Black NA, Lamping DL, *et al.* Consensus development methods, and their use in clinical guideline development. *Health Technol Assess.* 1998;2(3):i-iv, 1-88.
36. Jaeschke R, Guyatt GH, Dellinger P, *et al.* Use of GRADE grid to reach decisions on clinical practice guidelines when consensus is elusive. *Bmj.* 2008;337:a744.
37. De Meyer D, Kottner J, Beele H, *et al.* Delphi procedure in core outcome set development: rating scale and consensus criteria determined outcome selection. *J Clin Epidemiol.* 2019;111:23-31.
38. Lange T, Kopkow C, Lützner J, *et al.* Comparison of different rating scales for the use in Delphi studies: different scales lead to different consensus and show different test-retest reliability. *BMC Med Res Methodol.* 2020;20(1):28.
39. Brookes ST, Chalmers KA, Avery KNL, *et al.* Impact of question order on prioritisation of outcomes in the development of a core outcome set: a randomised controlled trial. *Trials.* 2018;19(1):66.
40. Brookes ST, Macefield RC, Williamson PR, *et al.* Three nested randomized controlled trials of peer-only or multiple stakeholder group feedback within Delphi surveys during core outcome and information set development. *Trials.* 2016;17(1):409.
41. Fish R, MacLennan S, Alkhaffaf B, *et al.* "Vicarious thinking" was a key driver of score change in Delphi surveys for COS development and is facilitated by feedback of results. *J Clin Epidemiol.* 2020.
42. Khodyakov D, Chen C. Response changes in Delphi processes: why is it important to provide high-quality feedback to Delphi participants? *J Clin Epidemiol.* 2020;125:160-1.
43. Kirkham JJ, Gorst S, Altman DG, *et al.* Core Outcome Set-STANDARDISED Protocol Items: the COS-STAP Statement. *Trials.* 2019;20(1):116.

## FOOTNOTES

### Authors' contributions

CPM, MDJ conceived the study. CPM, HB, AII, SK, NS, AGM, PRW, MDJ designed the study. CPM drafted the initial study protocol. TSA, HB, SB, ARB, HB, AC, LD, TG, PLG, AII, MJ, SMK, SDK, AGM, MWM, TRM, KO, PP, MP, TS, NS, MJBT, CT, CW, MW, PRW, GZ, AHZN, MDJ provided advice and input on the final protocol. CPM proofread and approved the final manuscript.

### Collaborators

International Consortium on Meningioma: Kenneth Aldape, Abdurrahman I. Islim, Karolyn Au, Jill Barnhartz-Sloan, Wenya Linda Bi, Felix Behling, Priscilla K. Brastianos, Chaya Brodie, Nicholas Butowski, Carlos Carlotti, Ana Castro, Aaron Cohen-Gadol, Marta Couce, Michael D. Cusimano, Francesco DiMeco, Katharine Drummond, Ian F. Dunn, Craig Erker, Michelle Felicella, Daniel M. Fountain, Evanthia Galanis, Norbert Galldiks, Caterina Giannini, Roland Goldbrunner, Brent Griffith, Rintaro Hashizume, C. Oliver Hanemann, Christel Herold-Mende, Luke Hnenny, Craig Horbinski, Raymond Y. Huang, David James, Michael D. Jenkinson, Christine Jungk, Gerhard Jungwirth, Timothy J. Kaufmann, Boris Krischek, Sylvia Kurz, Daniel Lachance, Christian Lafougère, Katrin Lamszus, Ian Lee, Jeff C. Liu, Serge Makarenko, Tathiana Malta, Yasin Mamatjan, Alireza Mansouri, Christian Mawrin, Michael McDermott, Christopher P. Millward, Jennifer Moliterno-Gunel, Andrew Morokoff, David Munoz, Farshad Nassiri, Houtan Noushmehr, Ho-Keung Ng, Arie Perry, Farhad Pirouzmand, Laila M Poisson, Bianca Pollo, Aditya Ragnathan, David Raleigh, Mirjam Renovanz, Franz Ricklefs, Felix Sahn, Andrea Saladino, Antonio Santacrose, Thomas Santarius, Jens Schittenhelm, Christian Schichor, David Schultz, Nils O. Schmidt, Warren Selman, Helen Shih, Andrew Sloan, Julian Spears, Matija Snuderl, James Snyder, Suganth Suppiah, Erik Sulman, Ghazaleh Tabatabai, Marcos Tatagiba, Marco Timmer, Daniela Tirapelli, Joerg C. Tonn, Derek Tsang, Michael A. Vogelbaum, Andreas von Deimling, Tobias Walbert, Simon Walling, Justin Wang, Patrick Y. Wen, Manfred Westphal, Adriana M. Workewych, Stephen Yip, Gabriel Zada, Gelareh Zadeh, Viktor Zhrebitskiy.

### Funding

CPM is funded to complete The COSMIC project by The Brain Tumour Charity grant: 'Deciphering the genetic and epigenetic landscape of clinically aggressive meningiomas' awarded to GZ and MDJ. Grant No. Jxr30103.

## Competing interests

MDJ received a grant from the National Institute for Health Research Health Technology Assessment program for the Radiation versus Observation for Atypical Meningioma (ROAM) trial (NIHR ID: 12/173/14). MDJ and SJM received a grant from the National Institute for Health Research Health Technology Assessment program for Surgeons Trial Of Prophylaxis for Epilepsy in seizure naïve patients with Meningioma (STOP'EM) (NIHR ID: NIHR129748). TS founded and leads the Anaplastic Meningioma International Consortium (AMiCo). TS and MDJ co-founded the British-Irish Meningioma Society (BIMS). MP has received honoraria for lectures, consultation or advisory board participation from the following for-profit companies: Bayer, Bristol-Myers Squibb, Novartis, Gerson Lehrman Group (GLG), CMC Contrast, GlaxoSmithKline, Mundipharma, Roche, BMJ Journals, MedMedia, Astra Zeneca, AbbVie, Lilly, Medahead, Daiichi Sankyo, Sanofi, Merck Sharp & Dome, Tocagen, Adastra. The following for-profit companies have supported clinical trials and contracted research conducted by MP with payments made to his institution: Böhringer-Ingelheim, Bristol-Myers Squibb, Roche, Daiichi Sankyo, Merck Sharp & Dome, Novocure, GlaxoSmithKline, AbbVie. MW has received research grants from Apogenix, Merck, Sharp & Dohme, Merck (EMD) and Quercis, and honoraria for lectures or advisory board participation or consulting from Adastra, Bristol Meyer Squibb, Medac, Merck, Sharp & Dohme, Merck (EMD), Nerviano Medical Sciences, Novartis, Orbus, Philogen and yMabs.

## Patient and public involvement

Patients and/or the public were involved in the design, or conduct, or reporting, or dissemination plans of this research.

## Patient consent for publication

Not required.

## Figure legends

Figure 1 - A flow chart summarising the 5 stages of The COSMIC project.

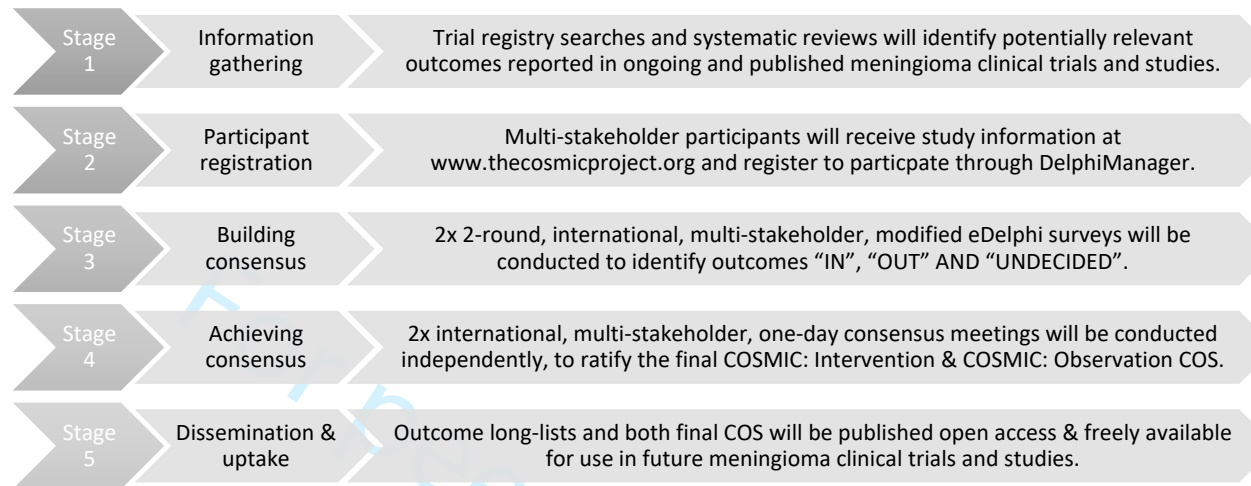

Figure 1 – A flow chart summarising the 5 stages of The COSMIC project.

Supplementary Appendix 1 - Example Medline search strategy for identifying intracranial meningioma clinical effectiveness trials.

| Search | Query                                                                                                    |
|--------|----------------------------------------------------------------------------------------------------------|
| 1      | meningioma*.tw.                                                                                          |
| 2      | meningioma/                                                                                              |
| 3      | 1 or 2                                                                                                   |
| 4      | exp clinical trial/                                                                                      |
| 5      | random allocation/                                                                                       |
| 6      | double-blind method/                                                                                     |
| 7      | single-blind method/                                                                                     |
| 8      | placebos/                                                                                                |
| 9      | randomized controlled trial.pt.                                                                          |
| 10     | controlled clinical trial.pt.                                                                            |
| 11     | clinical trial.pt.                                                                                       |
| 12     | clinical trial, phase ii.pt.                                                                             |
| 13     | clinical trial, phase iii.pt.                                                                            |
| 14     | clinical trial, phase iv.pt.                                                                             |
| 15     | (clin* adj25 trial*).tw.                                                                                 |
| 16     | (control* adj25 trial*).tw.                                                                              |
| 17     | random*.tw.                                                                                              |
| 18     | ((singl* or doubl* or tripl* or treb*) adj25 (blind* or mask*)).tw.                                      |
| 19     | (phase II or phase 2).tw.                                                                                |
| 20     | (phase III or phase 3).tw.                                                                               |
| 21     | (phase IV or phase 4).tw.                                                                                |
| 22     | placebo*.tw.                                                                                             |
| 23     | 4 or 5 or 6 or 7 or 8 or 9 or 10 or 11 or 12 or 13 or 14 or 15 or 16 or 17 or 18 or 19 or 20 or 21 or 22 |
| 24     | 3 and 23                                                                                                 |
| 25     | exp animals/ not human/                                                                                  |
| 26     | 24 not 25                                                                                                |
| 27     | limit 26 to english                                                                                      |



# BMJ Open

## Development of 'Core Outcome Sets' for Meningioma in Clinical Studies (The COSMIC Project): Protocol for two Systematic Literature Reviews, eDelphi Surveys and Online Consensus Meetings.

|                               |                                                                                                                                                                                                                                                                                                                                                                                                                                                                                                                                                                                                                                                                                                                                                                                                                                                                                                                                                                                                                                                                                                                                                                                                                                                                                                                                                                                                                                                                                                                                                                                                                                                                                                                                                                                                                                                                                                                                                                                                                                                                                                  |
|-------------------------------|--------------------------------------------------------------------------------------------------------------------------------------------------------------------------------------------------------------------------------------------------------------------------------------------------------------------------------------------------------------------------------------------------------------------------------------------------------------------------------------------------------------------------------------------------------------------------------------------------------------------------------------------------------------------------------------------------------------------------------------------------------------------------------------------------------------------------------------------------------------------------------------------------------------------------------------------------------------------------------------------------------------------------------------------------------------------------------------------------------------------------------------------------------------------------------------------------------------------------------------------------------------------------------------------------------------------------------------------------------------------------------------------------------------------------------------------------------------------------------------------------------------------------------------------------------------------------------------------------------------------------------------------------------------------------------------------------------------------------------------------------------------------------------------------------------------------------------------------------------------------------------------------------------------------------------------------------------------------------------------------------------------------------------------------------------------------------------------------------|
| Journal:                      | <i>BMJ Open</i>                                                                                                                                                                                                                                                                                                                                                                                                                                                                                                                                                                                                                                                                                                                                                                                                                                                                                                                                                                                                                                                                                                                                                                                                                                                                                                                                                                                                                                                                                                                                                                                                                                                                                                                                                                                                                                                                                                                                                                                                                                                                                  |
| Manuscript ID                 | bmjopen-2021-057384.R1                                                                                                                                                                                                                                                                                                                                                                                                                                                                                                                                                                                                                                                                                                                                                                                                                                                                                                                                                                                                                                                                                                                                                                                                                                                                                                                                                                                                                                                                                                                                                                                                                                                                                                                                                                                                                                                                                                                                                                                                                                                                           |
| Article Type:                 | Protocol                                                                                                                                                                                                                                                                                                                                                                                                                                                                                                                                                                                                                                                                                                                                                                                                                                                                                                                                                                                                                                                                                                                                                                                                                                                                                                                                                                                                                                                                                                                                                                                                                                                                                                                                                                                                                                                                                                                                                                                                                                                                                         |
| Date Submitted by the Author: | 09-Mar-2022                                                                                                                                                                                                                                                                                                                                                                                                                                                                                                                                                                                                                                                                                                                                                                                                                                                                                                                                                                                                                                                                                                                                                                                                                                                                                                                                                                                                                                                                                                                                                                                                                                                                                                                                                                                                                                                                                                                                                                                                                                                                                      |
| Complete List of Authors:     | <p>millward, Christopher; University of Liverpool, Institute of Systems, Molecular, &amp; Integrative Biology; The Walton Centre NHS Foundation Trust, Department of Neurosurgery</p> <p>Armstrong, Terri S. ; National Cancer Institute, Neuro-Oncology Branch, Center for Cancer Research</p> <p>Barrington, Heather; University of Liverpool, Health Data Science</p> <p>Bell, Sabrina; Brain Tumor Charity</p> <p>Brodbelt, Andrew; University of Liverpool, Institute of Systems, Molecular, &amp; Integrative Biology; The Walton Centre NHS Foundation Trust, Department of Neurosurgery</p> <p>Bulbeck, Helen; Brainstrust</p> <p>Crofton, Anna; The Walton Centre NHS Foundation Trust, Department of Neurosurgery</p> <p>Dirven, Linda; Leiden University Medical Center, Department of Neurology; Medical Centre Haaglanden, Department of Neurology</p> <p>Georgious, Theo; Brain Tumor Charity</p> <p>Grundy, Paul; University Hospital Southampton NHS Foundation Trust, Department of Neurosurgery</p> <p>Islim, Abdurrahman ; University of Liverpool, Institute of Systems, Molecular, &amp; Integrative Biology; The Walton Centre NHS Foundation Trust, Department of Neurosurgery</p> <p>Javadpour, Mohsen; Beaumont Hospital, National Centre for Neurosurgery</p> <p>Keshwara, Sumirat M.; University of Liverpool, Institute of Systems, Molecular, &amp; Integrative Biology; The Walton Centre NHS Foundation Trust, Department of Neurosurgery</p> <p>Koszdin, Shelli; Palo Alto VA Medical Center, Pharmacy</p> <p>Marson, Tony; University of Liverpool, Institute of Systems, Molecular, &amp; Integrative Biology; The Walton Centre NHS Foundation Trust, Department of Neurology</p> <p>McDermott, Michael W.; Florida International University, Division of Neuroscience</p> <p>Meling, Torstein R.; Geneva University Hospitals, Department of Neurosurgery</p> <p>Oliver, Kathy; IBTA</p> <p>Plaha, Puneet; University of Oxford, Nuffield Department of Surgical Sciences</p> <p>Preusser, Matthias; Medical University of Vienna, Division of Oncology,</p> |



|                                    |                                                                                                                                                                                                                                                                                                                                                                                                                                                                                                                                                                                                                                                                                                                                                                                                                                                                                                                                                                                                                                                                                                                                                                                                               |
|------------------------------------|---------------------------------------------------------------------------------------------------------------------------------------------------------------------------------------------------------------------------------------------------------------------------------------------------------------------------------------------------------------------------------------------------------------------------------------------------------------------------------------------------------------------------------------------------------------------------------------------------------------------------------------------------------------------------------------------------------------------------------------------------------------------------------------------------------------------------------------------------------------------------------------------------------------------------------------------------------------------------------------------------------------------------------------------------------------------------------------------------------------------------------------------------------------------------------------------------------------|
|                                    | <p>Department of Medicine<br/> Santarius, Thomas; Addenbrooke's Hospital, Department of<br/> Neurosurgery<br/> Srikandarajah, Nisaharan; University of Liverpool, Institute of Systems,<br/> Molecular, &amp; Integrative Biology; The Walton Centre NHS Foundation<br/> Trust, Department of Neurosurgery<br/> Taphoorn, Martin J.B.; Leiden University Medical Center, Department of<br/> Neurology; Medical Centre Haaglanden, Department of Neurology<br/> Turner, Carole; Addenbrooke's Hospital, Department of Neurosurgery<br/> Watts, Colin; University of Birmingham, Institute of Cancer and Genomic<br/> Studies<br/> Weller, Michael; University of Zurich, Department of Neurology<br/> Williamson, Paula; University of Liverpool, Institute of Population Health<br/> Zadeh, Gelareh; University of Toronto, Department of Surgery<br/> Zamanipour Najafabadi, Amir H.; Leiden University Medical Center,<br/> University Neurosurgical Center Holland<br/> Jenkinson, Michael; The Walton Centre NHS Foundation Trust; University<br/> of Liverpool, Institute of Systems, Molecular, &amp; Integrative Biology<br/> ICOM, International Consortium on Meningiomas; University of Toronto</p> |
| <b>Primary Subject<br>Heading</b>: | Oncology                                                                                                                                                                                                                                                                                                                                                                                                                                                                                                                                                                                                                                                                                                                                                                                                                                                                                                                                                                                                                                                                                                                                                                                                      |
| Secondary Subject Heading:         | Surgery, Pharmacology and therapeutics, Neurology                                                                                                                                                                                                                                                                                                                                                                                                                                                                                                                                                                                                                                                                                                                                                                                                                                                                                                                                                                                                                                                                                                                                                             |
| Keywords:                          | Neurosurgery < SURGERY, Clinical trials < THERAPEUTICS, Neurological<br>oncology < NEUROLOGY                                                                                                                                                                                                                                                                                                                                                                                                                                                                                                                                                                                                                                                                                                                                                                                                                                                                                                                                                                                                                                                                                                                  |
|                                    |                                                                                                                                                                                                                                                                                                                                                                                                                                                                                                                                                                                                                                                                                                                                                                                                                                                                                                                                                                                                                                                                                                                                                                                                               |

SCHOLARONE™  
Manuscripts

## Submission of manuscript to BMJ Open

1  
2  
3  
4  
5 Development of 'Core Outcome Sets' for Meningioma in Clinical Studies (The COSMIC Project):

6  
7 Protocol for two Systematic Literature Reviews, eDelphi Surveys and Online Consensus Meetings.  
8  
9  
10  
11  
12  
13  
14  
15  
16  
17  
18  
19  
20  
21  
22  
23  
24  
25  
26  
27  
28  
29  
30  
31  
32  
33  
34  
35  
36  
37  
38  
39  
40  
41  
42  
43  
44  
45  
46  
47  
48  
49  
50  
51  
52  
53  
54  
55  
56  
57  
58  
59  
60

For peer review only

## Authors & Affiliations

Christopher P. Millward\*

Terri S. Armstrong

Heather Barrington

Sabrina Bell

Andrew R. Brodbelt

Helen Bulbeck

Anna Crofton

Linda Dirven

Theo Georgious

Paul Grundy

Abdurrahman I. Islim

Mohsen Javadpour

Sumirat M. Keshwara

Shelli Diane Koszdin

Anthony G. Marson

Michael W. McDermott

Torstein R. Meling

Kathy Oliver

Puneet Plaha

Matthias Preusser

Thomas Santarius

Nisaharan Srikandarajah

Martin J.B. Taphoorn

Carole Turner

Colin Watts

Michael Weller

Paula R. Williamson

Gelareh Zadeh

Amir H. Zamanipoor Najafabadi

Michael D. Jenkinson

On behalf of EORTC BTG, ICOM, EANO, SNO, RANO-PRO, BNOS, SBNS, BIMS, TBTC, International Brain Tumour Alliance, Brainstrust, and Brain Tumour Foundation of Canada.

- 1 • Institute of Systems, Molecular, & Integrative Biology, University of Liverpool, UK (CPM, ARB, AII, SMK, AGM,  
2 NS, MDJ).
- 3 • Department of Neurosurgery, The Walton Centre NHS Foundation Trust, Liverpool, UK (CPM, ARB, AC, AII,  
4 SMK, NS, MDJ).
- 5 • Neuro-Oncology Branch, Center for Cancer Research, National Cancer Institute, Bethesda, Maryland, USA (TSA)
- 6 • Institute of Population Health, University of Liverpool, UK (HB, PRW)
- 7 • The Brain Tumour Charity (SB, TG).
- 8 • Brainstrust – the brain cancer people (HB).
- 9 • Department of Neurology, Leiden University Medical Center, The Netherlands (LD, MJBT).
- 10 • Department of Neurology, Haaglanden Medical Center, The Hague, The Netherlands (LD, MJBT).
- 11 • Department of Neurosurgery, University Hospital Southampton, UK (PG).
- 12 • National Centre for Neurosurgery, Beaumont Hospital, Dublin, Ireland (MJ).
- 13 • Veterans Affairs Healthcare System, Palo Alto, California, USA (SDK)
- 14 • Department of Neurology, The Walton Centre NHS Foundation Trust, Liverpool, UK (AGM).
- 15 • Division of Neuroscience, Florida International University, Florida, USA (MWM).
- 16 • Department of Neurosurgery, Geneva University Hospital, Geneva, Switzerland (TRM).
- 17 • International Brain Tumour Alliance (KO).
- 18 • Nuffield Department of Surgical Sciences, University of Oxford, UK (PP).
- 19 • Division of Oncology, Department of Medicine, Medical University of Vienna, Austria (MP).
- 20 • Department of Neurosurgery, Addenbrooke's Hospital & University of Cambridge, UK (TS, CT).
- 21 • Institute of Cancer and Genomic Sciences, University of Birmingham, UK (CW).
- 22 • Department of Neurology, University Hospital and University of Zurich, Switzerland (MW).
- 23 • Department of Surgery, University of Toronto, Canada (GZ).
- 24 • University Neurosurgical Center Holland, Leiden University Medical Centre, Haaglanden Medical Center, Haga  
25 Teaching Hospitals, Leiden and The Hague, The Netherlands (AHZN).

### 44 **\*Corresponding author**

45 Mr Christopher P. Millward

46 Department of Neurosurgery

47 The Walton Centre NHS Foundation Trust

48 Lower Lane

49 Liverpool, L9 7LJ

50 Emails: [drcpm@liverpool.ac.uk](mailto:drcpm@liverpool.ac.uk)

## Abstract

### Introduction:

Meningioma is the most common primary intracranial tumour in adults. The majority are non-malignant, but a proportion behave more aggressively. Incidental/minimally symptomatic meningioma are often managed by serial imaging. Symptomatic meningiomas, those that threaten neurovascular structures or demonstrate radiological growth, are usually resected as first-line management strategy. For patients in poor clinical condition, or with inoperable, residual, or recurrent disease, radiotherapy is often utilised as primary or adjuvant treatment. Effective pharmacotherapy treatments do not currently exist. There is heterogeneity in the outcomes reported in meningioma clinical studies. Two 'Core Outcome Sets' (COS) will be developed, (COSMIC: Intervention) for use in meningioma clinical effectiveness trials, and (COSMIC: Observation) for use in clinical studies of incidental/untreated meningioma.

### Methods and Analysis:

Two systematic literature reviews and trial registry searches will identify outcomes reported in published and ongoing 1) meningioma clinical effectiveness trials, and 2) clinical studies of incidental/untreated meningioma. Outcomes include those that are clinician-reported, patient-reported, caregiver-reported, and based on objective tests (e.g. neurocognitive tests), as well as measures of progression and survival. Outcomes will be deduplicated and categorised to generate two long-lists. The two long-lists will be prioritised through two, 2-round, international, modified eDelphi surveys including meningioma patients, healthcare professionals, researchers, and those in caring/supporting roles. The two final COS will be ratified through two, one-day online consensus meetings, with representation from all stakeholder groups.

### Ethics and Dissemination:

Institutional review board (University of Liverpool) approval was obtained for the conduct of this study. Participant eConsent will be obtained prior to participation in the eDelphi surveys and consensus meetings. The eDelphi long-lists and two final COS will be published and freely available.

**Key words:** Core Outcome Set, Meningioma, Clinical trial

**Trial registration number:**

This study is registered with the Core Outcome Measures in Effectiveness Trials (COMET) database as study 1508 and accessible at (<https://www.comet-initiative.org/Studies/Details/1508>). This study has University of Liverpool sponsorship and ethical approval (Ref UoL001601).

**Abstract Word Count: 270****Manuscript Word Count: 8203**

For peer review only

## STRENGTHS AND LIMITATIONS OF THIS STUDY

- Comprehensive systematic literature reviews will identify outcomes reported in published intracranial meningioma clinical effectiveness trials and clinical studies of incidental/untreated intracranial meningioma (reported according to Preferred Reporting Items for Systematic Reviews and Meta-Analyses (PRISMA) guidelines).
- Unique outcomes (classified according to the Core Outcome Measures in Effectiveness Trials (COMET) taxonomy) will be prioritised through consensus methodology including two, 2-round, international, multi-stakeholder, modified eDelphi surveys, followed by two online consensus meetings, to ratify the COSMIC: Intervention and COSMIC: Observation COS.
- COS for intracranial meningioma do not exist but are urgently needed to ensure core outcomes relevant to meningioma patients, healthcare professionals, researchers, and other key stakeholders are measured in future meningioma clinical trials and studies.
- ‘How’ and ‘when’ each outcome is measured is beyond the scope of this work and will be the focus of future research.

## Introduction

Meningioma is the most common primary intracranial tumour accounting for approximately 38% of all primary tumours of the central nervous system, with an estimated age-adjusted incidence of 8.8 per 100,000 population per year.[1] Meningioma are more than twice as common in females (12 vs 5.3 per 100,000 population).[1] Median age at diagnosis is 66 years, and incidence increases with age.[1] The World Health Organization (WHO) classification of tumours of the central nervous system describes three grades of meningioma, with the most recent distribution by grade as follows; 80.4% benign (WHO grade 1), 17.9% atypical (WHO grade 2) and 1.6% malignant (WHO grade 3).[1, 2] All meningiomas have a long-term risk of recurrence, as well as progression to a higher tumour grade.

For symptomatic meningioma, those that threaten neurovascular structures or demonstrate growth on interval imaging, a treatment intervention is warranted. Surgical resection is often the preferred first-line management strategy; however, for poor surgical candidates, patients with inoperable, residual, or recurrent disease, radiotherapy may be used as primary or adjuvant treatment to obtain disease control. Despite studies investigating different agents, there are no effective pharmacotherapy treatments.[3, 4] On the other hand, incidental intracranial meningioma may never require treatment. International consensus guidelines recommend interval MRI monitoring, however details surrounding the intervals and duration of follow-up, and indications for treatment are lacking.[5] A very low percentage of patients with an incidental intracranial meningioma develop symptoms during follow-up; 0-8%, however, the risk of growth has been reported to be between 10% and 70%.[6, 7] This heterogeneity in imaging behaviour leads to management decisions recommended to patients varying between active long-term MRI and clinical monitoring or upfront treatment with surgery or radiotherapy.[8]

### Intracranial meningioma clinical effectiveness trials

Clinical effectiveness trials in intracranial meningioma are sparse, but important research questions remain to be answered, especially for recurrent and high-grade meningioma. Two phase 2 studies investigating the efficacy of adjuvant radiotherapy following surgical resection of high-grade meningioma have been reported; Radiation Therapy Oncology Group (RTOG) 0539 [9] and the European Organisation for Research and Treatment of Cancer (EORTC) 22042,[10] as well as a phase 2 trial of trabectedin for recurrent grade 2/3 meningioma.[11] There are currently two phase 3 randomized controlled trials underway to establish the role of radiotherapy after gross-total resection of WHO



1 grade 2 meningioma; ROAM/EORTC 1308 [12] and NRG-BN003,[13] as well as a phase 2 trial of Vismodegib, the  
2 Focal Adhesion Kinase (FAK) inhibitor GSK2256098, and Capivasertib for progressive meningioma.[14] There are  
3 other clinical effectiveness trials in development, such as STOP'EM which will aim to establish the role of prophylactic  
4 levetiracetam in seizure naïve patients undergoing resection of meningioma.[15] However, the outcomes measured and  
5 reported in meningioma clinical effectiveness trials are not standardised.  
6  
7  
8  
9

### 10 11 12 **Clinical studies of incidental and untreated intracranial meningioma**

13  
14  
15 Clinical studies of incidental and untreated intracranial meningioma are rare. Recent work has attempted to accurately  
16 define risk factors for untreated meningioma growth. The **Asan Intracranial Meningioma Scoring System (AIMSS)** and  
17 **Incidental Meningioma: Prognostic Analysis Using Patient Comorbidity and MRI Tests (IMPACT)** calculator stratify  
18 patients based on the imaging features of a meningioma into risk groups.[16, 17] Albeit both scoring systems require  
19 validation with external datasets, they underpin clinical equipoise in patients with an untreated meningioma and pave  
20 the way for prospective clinical studies. Patients with meningiomas at high risk of progression e.g.  $\geq 3$  cm, T2  
21 hyperintense and with peri-tumoural signal change (indicative of vasogenic oedema) are likely to benefit from an  
22 intervention trial, whereas patients with low- or medium-risk meningiomas may draw more benefit from trials that  
23 compare different monitoring strategies. Similarly, the outcomes measured and reported in clinical studies of incidental  
24 and untreated intracranial meningioma are also not standardised.  
25  
26  
27  
28  
29  
30  
31  
32  
33  
34  
35  
36  
37

### 38 **Rationale for the development of Core Outcome Sets for intracranial meningioma**

39  
40 Interest in meningioma is increasing, in part due to the 'meningiomics' revolution, which offers the prospect of treatment  
41 arm stratification by molecular and genomic aberration, and the potential for personalised management options.[14, 18]  
42  
43 With this comes the difficulty of recruitment of a sufficient number of patients into treatment arms, for instance, when  
44 stratification is by a single point mutation present in only 5-10% of what is already a rare disease. For this reason, future  
45 meningioma clinical effectiveness trials will need to be 1) global, multi-institutional efforts 2) allow meaningful  
46 comparison across studies in order to determine comparative efficacy, 3) measure the outcomes that are important to all  
47 stakeholders including meningioma patients, and 4) resourceful and not performed in duplicate, or near duplicate with  
48 different outcomes measured and reported for similar research questions. The development of a core outcome set (COS)  
49 for meningioma to be used in future clinical effectiveness trials will enable the alignment of these aims.  
50  
51  
52  
53  
54  
55  
56  
57  
58  
59  
60

1 There is also increasing interest in asymptomatic patients with an incidentally discovered intracranial meningioma, who  
2 may never require treatment. The balance between observation and intervention, and the benefit vs. harm of each  
3 strategy, is not yet clear. Future prospective clinical studies could benefit from the implementation of a COS that is  
4 specific to this patient group, in recognition of the specific outcomes that are likely to be considered core.  
5  
6  
7  
8  
9

10 A COS is defined as the *minimum* set of outcomes that should be measured and reported in all clinical trials of a specific  
11 condition.[19] To date, over 400 COS have been developed for various diseases and conditions, with over 300 in  
12 progress, and they are increasingly recognized as critical to the design of clinical research.[20] None have yet been  
13 developed within the field of neuro-oncology. The aim of this project is to develop two COS for intracranial  
14 meningioma; one for clinical effectiveness trials (COSMIC: Intervention) and one for observational studies (COSMIC:  
15 Observation). This novel methodological approach has been chosen because meningioma is a highly heterogeneous  
16 disease, and we assume that the outcomes likely to be considered core by key stakeholders, will be somewhat different  
17 for a COS developed for interventional, in comparison to observational studies. This protocol describes the development  
18 of both COS. The COS should be appropriately utilised in future intracranial meningioma clinical effectiveness trials  
19 across the breadth of interventions being tested, and future clinical studies of incidental and untreated intracranial  
20 meningioma.  
21  
22  
23  
24  
25  
26  
27  
28  
29  
30  
31  
32  
33  
34  
35

36 The specific objectives of this project are as follows:  
37  
38  
39

- 40 1. Identify outcomes reported in ongoing and published meningioma clinical effectiveness trials and clinical  
41 studies of incidental and untreated intracranial meningioma, through trial registry searches and two systematic  
42 literature reviews.  
43  
44
- 45 2. Recruit patients with an intracranial meningioma, healthcare professionals, researchers & other key stakeholders  
46 in caring or supporting roles to one of, or both, 2-round, international, modified eDelphi surveys to reduce long-  
47 lists of potentially relevant unique outcomes.  
48  
49
- 50 3. Conduct two independent, one-day, international, multi-stakeholder, online consensus meetings to ratify the  
51 COSMIC: Intervention and COSMIC: Observation COS.  
52  
53  
54  
55  
56  
57  
58  
59  
60

- 1  
2  
3  
4  
5  
6  
7  
8  
9
4. Make freely available and disseminate widely, a COS for use in all future intracranial meningioma clinical effectiveness trials, and a COS for use in all future clinical studies of incidental and untreated intracranial meningioma.

### 10 11 12 13 14 15 16 17 18 19 20 21 22 23 24 25 26 27 28 29 30 31 32 33 34 35 36 37 38 39 40 41 42 43 44 45 46

#### **Scope of the COS**

For a COS to be selected and utilised by clinical triallists, the scope must be clear (research or practice setting(s) in which the COS is to be applied, and the health condition(s), populations(s), and intervention(s) covered by the COS). A COS with a broad scope may lack relevance for heterogeneous disease entities, but if scope is too narrow, it may never be used. Core Outcome Set Standards for Development (COS-STAD) recommendations have been described; the product of an international consensus process involving experienced COS developers.[21] The purpose of these 11 minimum standards is to facilitate COS development by providing a framework to consider when project planning.

Such is the importance of scope for the successful development and uptake of a COS, that The COSMIC Project encompasses the development of two distinct COS for the same health condition. The scope of both COS is defined within the 11 minimum COS-STAD recommendations (Table 1). In summary, the COSMIC: Intervention COS will be developed for use in phase 2 and later, intracranial meningioma clinical effectiveness trials in adults, that are designed to inform clinical decision making and improve clinical care for patients. The COS will be applicable to all interventions utilised to treat the disease including surgical resection, radiotherapy, stereotactic radiosurgery, pharmacotherapy, perioperative care, and supportive treatments; any of which may be used in isolation or in combination. Conversely, the COSMIC: Observation COS will be developed for use in observational clinical studies of incidental and untreated intracranial meningioma, that are designed to inform monitoring and decision to treat strategies.

#### **Registration**

47  
48  
49  
50  
51  
52  
53  
54  
55  
56  
57  
58  
59  
60

The study is registered with the Core Outcome Measures in Effectiveness Trials database as study 1508 accessible at (<https://www.comet-initiative.org/Studies/Details/1508>). This study has University of Liverpool Sponsorship and ethical approval (Ref UoL001601).

| Domain                | Standard | Methodology                                                                                 | COSMIC: Intervention                                                                                                                                                                                                                                                                                       | COSMIC: Observation                                                                                                                                                                                                                                                                                                                      |
|-----------------------|----------|---------------------------------------------------------------------------------------------|------------------------------------------------------------------------------------------------------------------------------------------------------------------------------------------------------------------------------------------------------------------------------------------------------------|------------------------------------------------------------------------------------------------------------------------------------------------------------------------------------------------------------------------------------------------------------------------------------------------------------------------------------------|
| Scope specification   | 1        | The research or practice setting(s) in which the COS is to be applied                       | Later phase clinical effectiveness trials that will inform clinical decision making.                                                                                                                                                                                                                       | Clinical studies of incidental and untreated intracranial meningioma that will inform clinical decision making.                                                                                                                                                                                                                          |
|                       | 2        | The health condition(s) covered by the COS                                                  | Sporadic intracranial meningioma requiring intervention.                                                                                                                                                                                                                                                   | Incidental and untreated intracranial meningioma.                                                                                                                                                                                                                                                                                        |
|                       | 3        | The population(s) covered by the COS                                                        | Human adults aged 18 or above.                                                                                                                                                                                                                                                                             | Human adults aged 18 or above.                                                                                                                                                                                                                                                                                                           |
|                       | 4        | The intervention(s) covered by the COS                                                      | Interventions including surgical resection, radiotherapy, stereotactic radiosurgery, chemotherapy, perioperative care and supportive treatments; any of which may be in isolation or in combination with each other.                                                                                       | Active monitoring only as an intervention, but not treatment for an intracranial meningioma.                                                                                                                                                                                                                                             |
| Stakeholders involved | 5        | Those who will use the COS in research                                                      | Clinical trialists who manage patients with intracranial meningioma. They are included in standard 6.                                                                                                                                                                                                      | Clinical trialists who manage patients with intracranial meningioma. They are included in standard 6.                                                                                                                                                                                                                                    |
|                       | 6        | Healthcare professionals with experience of patients with the condition                     | This will include clinicians from multiple subspecialties and non-clinician healthcare professionals with active involvement in the care of patients with intracranial meningioma.                                                                                                                         | This will include clinicians from multiple subspecialties and non-clinician healthcare professionals with active involvement in the care of patients with intracranial meningioma.                                                                                                                                                       |
|                       | 7        | Patients with the condition or their representatives                                        | Patients with a diagnosis of intracranial meningioma who have received treatment will be included, along with relatives and carers of such patients.                                                                                                                                                       | Patients with a diagnosis of incidental intracranial meningioma who have not received treatment will be included, along with relatives and carers of such patients.                                                                                                                                                                      |
| Consensus process     | 8        | The initial list of outcomes considered both healthcare professionals' and patients' views. | A trial registry search and systematic literature review of intracranial meningioma trial outcomes will consider healthcare professionals' views, whilst a published systematic review of patient-reported outcomes, and published semi-structured interviews with patients will consider patients' views. | A trial registry search and systematic literature review of clinical studies of incidental and untreated intracranial meningioma will consider healthcare professionals' views, whilst a published systematic review of patient-reported outcomes, and published semi-structured interviews with patients will consider patients' views. |
|                       | 9        | A scoring process and consensus definition were described a priori.                         | Described in the 'scoring' and 'Analysis' section of this protocol.                                                                                                                                                                                                                                        | Described in the 'scoring' and 'Analysis' section of this protocol.                                                                                                                                                                                                                                                                      |
|                       | 10       | Criteria for including/dropping/adding outcomes were described a priori.                    | Described in the 'Analysis' section of this protocol.                                                                                                                                                                                                                                                      | Described in the 'Analysis' section of this protocol.                                                                                                                                                                                                                                                                                    |
|                       | 11       | Care was taken to avoid ambiguity of language used in the list of outcomes.                 | Both study content and study materials will utilise plain language summaries and clinical explanations where necessary. All materials will be reviewed with Patient Research Partners and pilot tested with patients and healthcare professionals.                                                         | Both study content and study materials will utilise plain language summaries and clinical explanations where necessary. All materials will be reviewed with Patient Research Partners and pilot tested with patients and healthcare professionals.                                                                                       |

Table 1 - Core Outcome Set Standards for Development recommendations as applied to both COSMIC: Intervention and COSMIC: Observation COS.

## Methods and Analysis

Development of the COSMIC: Intervention and COSMIC: Observation COS consists of two distinct phases:

Phase 1 concerns the generation of two long-lists of unique outcomes that are potentially relevant to key stakeholders.

The long-lists will be generated by extracting outcomes measured and reported in ongoing and published intracranial meningioma clinical effectiveness trials and clinical studies of incidental and untreated intracranial meningioma. Ongoing studies will be identified from trial registry searches, whilst published studies will be identified from systematic reviews of the literature. Phase 1 commenced after protocol manuscript submission in September 2021 and will be complete by April 2022.

Phase 2 concerns the prioritisation of the unique outcome long-lists developed in phase 1. Two, 2-round, international, multi-stakeholder, eDelphi surveys will be administered, to achieve a degree of consensus on which unique outcomes should be included or excluded in the final COSMIC: Intervention and COSMIC: Observation COS, according to pre-set criteria. Those unique outcomes without a conclusive consensus decision will be discussed in one of two online consensus meetings to ratify the final COSMIC: Intervention and COSMIC: Observation COS. A study flow-chart summarises the key steps of this project (Figure 1). Phase 2 will commence in May 2022 and will be complete by October 2022.

## Phase 1 – Generation of two long-lists of outcomes, of potential relevance to key stakeholder groups

The purpose of phase 1 is to generate two long-lists of unique outcomes measured and reported in ongoing and published intracranial meningioma clinical effectiveness trials and clinical studies of incidental and untreated intracranial meningioma. The long-lists will consist of unique outcomes that are of potential relevance to key stakeholders.

### *Trial registry search and systematic review of the literature to identify ongoing and published intracranial meningioma clinical effectiveness trials*

#### *Research question:*

What outcomes are measured and reported in ongoing and published clinical trials assessing the effectiveness of interventions including surgery, radiotherapy, stereotactic radiosurgery, pharmacotherapy, perioperative care, and supportive treatments, used in isolation or in combination for adult intracranial meningioma?

#### *Types of studies:*

This systematic review of the literature will identify published full-texts that describe phase 2, 3, and 4 clinical trials (including single-arm studies) that assess the effectiveness of an intervention for patients with an intracranial meningioma. Articles will be required to describe trial results and have a minimum of 20 adult intracranial meningioma patients. If multiple publications exist in relation to an individual study, for example an interim analysis of a clinical trial, final results, as well as an additional prognostic paper, then the publications will be considered together as one study, and repetition of data extraction would not be performed. Online international trial registries will be searched to identify ongoing trials. Only online trial registry entries and published trials written in the English language will be included, due to resource limitations.

#### *Types of interventions:*

Eligible interventions include the full breadth investigated in intracranial meningioma clinical effectiveness trials. Broadly speaking, this will include surgical interventions (including modified techniques, approaches, and adjuncts), fractionated radiotherapy (in any form including conformal three-dimensional and intensity-modulated radiotherapy), stereotactic radiosurgery (single fraction, hypofractionated or fractionated), pharmacotherapy (whereby the

1 investigators include outcomes related to the effectiveness of the drug, and not simply the tolerability of the drug),  
2 perioperative care (including medical therapies, anaesthetic considerations, and general aspects of the care of patients  
3 with intracranial meningioma in and around the time of treatment), and supportive treatments (for example  
4 neurorehabilitation and ongoing medical therapies for symptom control). Studies will be included if they investigate an  
5 intervention in isolation or in any combination e.g. surgical resection plus a specific radiotherapy and/or chemotherapy  
6 regime.  
7  
8  
9  
10  
11  
12  
13  
14

#### 15 *Types of participants:*

16 Participants will comprise adults (18 years and above) of either sex, with a diagnosis of sporadic intracranial  
17 meningioma. The diagnosis need not be made histopathologically, as participants may potentially be recruited into trials  
18 based on a radiological diagnosis of an intracranial meningioma.  
19  
20  
21  
22  
23  
24

#### 25 *Exclusion criteria:*

26 We will not include clinical efficacy studies, or studies of a purely experimental nature, e.g. exploratory studies to  
27 identify biomarkers. Some studies identify themselves as combined phases, for instance Phase 0/2, Phase 1/2. These  
28 studies will be evaluated and discussed between members of the study management group (SMG) to establish where  
29 the focus of the work sits. Studies with a primarily Phase 0 or 1 component will be excluded. Case studies and case  
30 series (with fewer than 20 participants) will be excluded. Meningioma within the spinal column are outside the scope  
31 of this review and COSMIC: Intervention and will be excluded. Studies investigating meningioma secondary to  
32 radiation (e.g. administered in childhood as an intervention for cancer) will not be included as this is considered a  
33 different disease entity. Similarly, studies investigating meningioma in cohorts of patients with the genetic condition  
34 Neurofibromatosis type 2 (NF2) would not be included as again, this is also considered to be a different disease entity,  
35 given the predisposition to manifest at an early age, not only meningioma, but also schwannoma of the cranial and  
36 peripheral nerves, ependymoma, astrocytoma, as well as skin and ocular findings. To include studies of spinal column,  
37 radiation-induced, and NF2-associated meningioma would identify outcomes that are likely to be of no/limited relevance  
38 to key stakeholders contributing to a consensus study to establish a COS for sporadic intracranial meningioma. Studies  
39 with a mix of brain tumour types and at least 20 patients with an intracranial meningioma would be included however,  
40 on the assumption that the outcomes measured and reported could be of relevance to key stakeholders.  
41  
42  
43  
44  
45  
46  
47  
48  
49  
50  
51  
52  
53  
54  
55  
56  
57  
58  
59  
60

### *Search strategy:*

A detailed search strategy utilising the search strings ‘meningioma’ AND ‘trial’ has been developed and translated to interrogate the following electronic bibliographic databases: PubMed, EMBASE, MEDLINE, CINAHL via EBSCO, and Web of Science. In addition, simple searches of the following trial registries will be conducted: Cochrane Central Register of Controlled Trials, ClinicalTrials.gov, and the WHO International Clinical Trials Registry Platform. The search strategies are provided in supplementary appendix 1. Prior to completing the review, the searches will be re-run to identify new records published since the original search.

### *Identification of eligible studies:*

Search results will be downloaded from their respective online databases, and uploaded to the online platform Rayyan.[22] Following deduplication, two review authors (CPM and SMK) will independently screen all titles and abstracts retrieved, according to the inclusion and exclusion criteria. Screening will be performed on the Rayyan platform independently, with each review author blind to the screening choice of the other. Full-text copies of all titles which appear to meet the inclusion criteria will be obtained, but also titles where a decision cannot be confidently made based on title and abstract alone. The same two review authors will independently screen all full-text copies to assess for eligibility. A lack of agreement at screening or full-text eligibility check will initially be discussed between the two review authors and if agreement is not reached, the issue will be escalated to the senior review author (MDJ). The complete reference list of full-text titles included will be screened to identify titles not identified through the searches. In addition, trial registries will be searched independently by the same two reviewers implementing the same procedures to identify ongoing studies not yet published which describe outcomes that will be reported.

### ***Trial registry search and systematic review of the literature to identify ongoing and published clinical studies of incidental and untreated intracranial meningioma***

### *Research question:*

What outcomes are measured and reported in ongoing and published clinical studies describing cohorts of adults with incidental and untreated intracranial meningioma?



*Types of studies:*

This systematic review of the literature will identify published full-texts that describe any cohort of adults with incidental and untreated intracranial meningioma, with a minimum of 20 patients. Studies are likely to be observational in design. Again, multiple publications relating to one study cohort will be considered together and online international trial registries will be searched to identify ongoing studies.

*Types of interventions:*

This systematic review is concerned with patients who have not received a treatment intervention, but have undergone active monitoring of an incidental intracranial meningioma. Studies will be included if they present outcomes for patient cohorts who have received a radiological diagnosis of an intracranial meningioma, but no treatment intervention. For the purposes of this review, active monitoring is therefore considered to be an intervention and may include clinical review (including history and clinical examination), testing (for instance, to obtain patient-reported, caregiver-reported, or performance outcomes), and imaging (using any modality and with any frequency).

*Types of participants:*

Participants will comprise adults (18 years and above) of either sex, with a radiological diagnosis of an intracranial meningioma.

*Exclusion criteria:*

Clinical studies with fewer than 20 participants will be excluded. Again, studies investigating spinal column, radiation-induced, and NF2-associated meningioma are outside the scope of this review and COSMIC: Observation, and will be excluded.

*Search strategy:*

A detailed search strategy utilising the search strings 'meningioma' AND 'incidental' OR 'untreated' has been developed and again, translated to interrogate bibliographic databases, as well as simple trial registry searches. A re-run of searches will again be performed. These search strategies are also provided in supplementary appendix 1.

*Identification of eligible studies:*

1 Again, search results will be processed in the online platform Rayyan.[22] Following deduplication, two review authors  
2 (CPM and AII) will independently screen all titles and abstracts retrieved, according to the inclusion and exclusion  
3 criteria. Full-text evaluation for eligibility, screening for additional titles, and trial registry searches will be performed  
4 according to the aforementioned methodology.  
5  
6  
7

### 10 ***Extraction of outcomes measured and reported in ongoing and published clinical studies***

#### 15 *Definition of an outcome:*

16  
17 A trial or study outcome is a measurable variable examined in response to a treatment or intervention. Active monitoring  
18 of an intracranial meningioma shall be considered an intervention. For the purposes of this study, a trial outcome will  
19 be defined as ‘one that has original meaning and context’ and so different phrasing or spelling of a word, or an idea that  
20 addresses the same concept will be categorised as one outcome.[23] This study is therefore concerned with any measured  
21 and reported variable (trial/study outcome) that attempts to assess response or condition. The U.S. Food & Drug  
22 Administration (FDA) describe four types of clinical outcome assessment (COA) that may be reported, namely patient-  
23 reported (e.g., health-related quality of life), clinician-reported (e.g., adverse events), observer-reported (e.g., input from  
24 informal caregivers on activities of daily living), or performance outcomes (e.g., neuropsychological tests). Other  
25 traditional outcomes of relevance include those that relate to progression (and its measurement) and survival.  
26  
27  
28  
29  
30  
31  
32  
33  
34  
35  
36  
37

#### 38 *Data extraction:*

39  
40 Data will be extracted from eligible articles and trial registry entries by a single review author (CPM) into one of two  
41 custom designed and piloted spreadsheets in Microsoft Excel (v16.34, Microsoft, Washington, DC, USA) following  
42 best practice described by COMET.[19, 20] The first 10% of included titles will be dual extracted by a second review  
43 author to assess for consistency and accuracy of extraction (COSMIC: Intervention – SMK, COSMIC: Observation -  
44 AII). If differences exist in the verbatim outcomes extracted by the two review authors, this will be discussed, resolved,  
45 and a further 10% will be extracted until concordance is established. For the purposes of this study, concordance is  
46 defined as less than 5% difference between both review authors. If disagreements cannot be resolved, these will be  
47 escalated to the senior review author (MDJ).  
48  
49  
50  
51  
52  
53  
54  
55  
56  
57  
58  
59  
60

1 The following data will be extracted from each study as recommended by COMET:[19, 20] study type, study population,  
2 first author, year and journal of publication, intervention(s) under investigation, each outcome reported (recorded  
3 verbatim) from the study abstract, methods, or results, the definition of the outcome, whether outcome is a primary or  
4 secondary outcome, the indicator and/or tool(s) used to operationalize or measure the outcome, and the time points or  
5 time-period at which the outcome was measured. The number of verbatim outcomes per trial/study will be recorded.  
6  
7  
8  
9

10  
11  
12  
13 Matching outcomes that have been measured at multiple time-points will not be recorded as different outcomes. As  
14 previously described, eligible articles that relate to an individual study will be considered together as one study. For  
15 example, an outcome measured and reported in exactly the same way in both an interim analysis and final results report  
16 would only be extracted once in relation to that study. If a new outcome was measured and reported in the final results  
17 report, this would be considered a new outcome and extracted in addition to all outcomes in the interim analysis.  
18  
19  
20  
21  
22

#### 23 24 25 *Data analysis:*

26  
27 Tabulation and descriptive data analysis will be performed in Microsoft Excel (v16.34, Microsoft, Washington, DC,  
28 USA) with the aim of deduplicating outcomes to generate two lists of unique outcomes measured and reported across  
29 the breath of studies identified. Given that there exists considerable heterogeneity in the definition of what constitutes a  
30 unique outcome and the difficulties in prioritising and achieving consensus when similar outcomes are advanced, we  
31 describe our method of data analysis as per Young et al.,[23] and classify outcomes according to the outcome framework  
32 proposed by COMET.[19, 24]  
33  
34  
35  
36  
37  
38  
39  
40  
41

42 For patient-reported outcome measures (PROMs), content analysis will be performed according to the method described  
43 by Macefield et al.[25] For each PROM identified, the PROM development paper will be identified and reviewed in  
44 order to establish whether or not the PROM is validated for use in meningioma. Frequency of use of a PROM and the  
45 studies utilising it will be listed. The number of single and multi-item scales for each PROM will be recorded. For each  
46 single- or multi-item PROM scale; verbatim scale name, verbatim scale component name, and verbatim scale component  
47 or single item description will be recorded. Verbatim scale component and single item descriptions will be classified  
48 according to the COMET taxonomy into core areas and outcome domains, followed by a subdomain category.[24] This  
49 process will be reviewed by members of the study advisory group (SAG) to ensure rigorous and consistent application  
50 of the classification system.  
51  
52  
53  
54  
55  
56  
57  
58  
59  
60

1  
2 ***Creation of two unique long-lists of outcomes potentially relevant to stakeholder groups of COSMIC: Intervention***  
3  
4 ***and COSMIC: Observation***  
5  
6  
7

8 Outcomes extracted in relation to intracranial meningioma clinical effectiveness trials will be used to generate the long-  
9 list for the COSMIC: Intervention eDelphi survey, whilst outcomes extracted in relation to clinical studies of incidental  
10 and untreated intracranial meningioma will be used to generate the long-list for the COSMIC: Observation eDelphi  
11 survey. Within each long list, exact matching outcomes will be deduplicated. Those outcomes that remain will be  
12 grouped for further deduplication when similarities in spelling, meaning, or context are judged to exist. For instance,  
13 the outcomes 'seizure' and 'fit' may be considered synonymous and could therefore be deduplicated to 'seizure'. Whilst  
14 the two long-lists remain separate, a consistent approach will be applied to both. For instance, if the outcomes 'seizure'  
15 and 'fit' are within both long-lists, and the outcome was deduplicated to 'seizure', this term would be selected for both  
16 long-lists. This process will be performed jointly by three members of the SMG (CPM, AII, and MDJ), then reviewed  
17 by two further SMG members (AGM and PRW), prior to final review by SAG members and patient research partners  
18 (PRPs).  
19  
20  
21  
22  
23  
24  
25  
26  
27  
28  
29  
30  
31  
32  
33

34 The data that describes 'how' and 'when' each extracted outcome is measured will be used for subsequent COS work  
35 to inform 'how' and 'when' the outcomes constituting both COS could be measured. The review will be reported in  
36 accordance with the Preferred Reporting Items for Systematic Reviews and Meta-analysis (PRISMA) guidelines where  
37 applicable,[26] which for the purposes of this study would exclude the following items (11, 12, 13e, 13f, 14, 15, 18, 19,  
38 20, 21, 22).  
39  
40  
41  
42  
43  
44  
45  
46  
47  
48  
49  
50  
51  
52  
53  
54  
55  
56  
57  
58  
59  
60

## Phase 2 – Outcome consolidation and consensus building

Phase 2 incorporates key stakeholders into The COSMIC Project which includes patients with lived experience of intracranial meningioma, along with other key stakeholder groups. The aim of phase 2 is to firstly reduce the two long-lists of unique outcomes from phase 1 by the use of two modified eDelphi surveys, and then to ratify the final COSMIC: Intervention and COSMIC: Observation COS at two independent, one-day online consensus meetings.[27]

### *eDelphi surveys*

The eDelphi surveys will adhere to the standards described by COMET [19]. As previously described, the SAG will scrutinise the two long-lists developed by the SMG to ensure both are fit for purpose. This may include removal of obsolete outcomes, further rationalisation of outcomes, or the addition of new outcomes felt to be of importance. The COSMIC project does not include primary, semi-structured interviews with patients with an intracranial meningioma. However, patient-centred outcomes have been reported in published, semi-structured interviews conducted with intracranial meningioma patients that explored the relevance of issues, and issues not addressed, in existing health-related quality of life questionnaires.[28] Additional, unique patient-centred outcomes reported in this source will be considered by the SAG, for supplementation of the two long-lists if deemed necessary.

Each unique outcome to be included in the eDelphi survey will be ascribed a lay definition. The two final long-lists of unique, COMET classified outcomes with associated lay definitions will be reviewed by the study PRPs to ensure there is clarity of meaning, a lack of replication of outcomes within each list, and lists which are acceptable to patient participants with respect to length.[29]

### *Research question:*

Which outcomes do patients with an intracranial meningioma, healthcare professionals, researchers and other key stakeholders believe should be included in a COS for use in future meningioma clinical effectiveness trials and in a COS for use in future clinical studies of incidental and/or untreated intracranial meningioma?

### *Methods:*

1 Key stakeholders, including patients with a radiological or histological diagnosis of intracranial meningioma will be  
2 invited to participate in one or both of the eDelphi surveys. The eDelphi surveys will utilise a ‘modified’ approach [30]  
3 as opposed to a ‘traditional’ approach,[31] whereby the outcomes obtained from phase 1 of the study are presented in  
4 the first round of the eDelphi surveys for rating. The first round of the eDelphi surveys will also offer the opportunity  
5 for participants to suggest outcomes that have not been presented. These outcomes would not be scored but will be  
6 reviewed prior to the second round of the eDelphi surveys by the SAG and considered for inclusion in the second round,  
7 should the outcome be judged as unique and appropriate. Two rounds will be utilised to reduce attrition bias, along with  
8 two panels (Panel 1 - Healthcare professionals and researchers, Panel 2 - Patients and relatives/patient support roles).[32]  
9 Participant level data will be pseudo-anonymised. A participant’s identity is not revealed, and responses made by an  
10 individual participant are not identifiable.  
11  
12  
13  
14  
15  
16  
17  
18  
19  
20  
21  
22

### 23 *Inclusion criteria:*

24  
25 Participants will be recruited to phase 2 of the study from three key stakeholder groups: healthcare professionals and  
26 researchers who will use the COS, patients with a radiological or histological diagnosis of intracranial meningioma, and  
27 other stakeholders in a caring or supporting role to a patient with an intracranial meningioma. All participants must be  
28 over the age of 18 and able to complete the online survey/s in English.  
29  
30  
31  
32  
33  
34  
35

### 36 Meningioma patients

37  
38 Patients who have completed or are receiving treatment for an intracranial meningioma with surgery, radiotherapy,  
39 stereotactic radiosurgery or pharmacotherapy, either in isolation or in combination are eligible to participate in the  
40 COSMIC: Intervention eDelphi survey only. Patients who have not received treatment for a radiologically diagnosed  
41 intracranial meningioma are eligible to participate in the COSMIC: Observation eDelphi survey only.  
42  
43  
44  
45  
46  
47  
48

### 49 Healthcare professionals and researchers

50  
51 Any member of the clinical team directly responsible for the care of patients with a meningioma. The neuro-oncology  
52 multi-disciplinary team (MDT; also known as the ‘tumour board’ in other countries) consists of the following roles who  
53 are all eligible to participate: neurosurgeons and ear, nose, and throat surgeons who operate on meningiomas, neuro-  
54 oncology specialist nurses, radiation oncologists, medical oncologists, neurologists, neuropathologists, and  
55 neuroradiologists. Whilst it is anticipated that the majority of researchers likely to use both COS will also be healthcare  
56  
57  
58  
59  
60

professionals directly involved in the care of patients with a meningioma, those not directly involved in care but who are likely to use the COS will also be eligible to participate (e.g. neuropsychologist or epidemiologist). Healthcare professionals are eligible and will be encouraged to participate in both eDelphi surveys.

### Caring or supporting roles

Individuals who provide a regular and involved caring or supporting role to a patient with a meningioma will be eligible to participate, including the following: primary carers, family members, and charity/support group representatives as these participants will likely offer a different but important perspective on outcomes that matter to meningioma patients. Individuals in a caring or supporting role are eligible to participate in one or both eDelphi surveys dependent upon the individual participants experience. For instance, a relative in a supporting role to a patient with an incidental and/or untreated meningioma would only be eligible to participate in COSMIC: Observation. However, a charity support worker who has provided input to both patients who have received treatment, and patients who have not, would be eligible and encouraged to participate in the eDelphi surveys for both COSMIC: Intervention and COSMIC: Observation.

### *Sampling and recruitment:*

#### Healthcare professionals

Healthcare professional participants will be recruited locally, nationally and internationally. The main study site (The Walton Centre NHS Foundation Trust) has a weekly neuro-oncology MDT meeting which will be contacted to recruit local healthcare professional participants. Neuro-oncology multidisciplinary teams or similar will be contacted at all other UK neurosurgical centres to maximise national recruitment. Where personal contacts of the study advisory group exist, these will also be utilised. National recruitment will also be sought by advertisement through national professional societies, including the British-Irish Meningioma Society (BIMS), the British Neuro-Oncology Society (BNOS), the Society of British Neurological Surgeons (SBNS), and the British Skull Base Society (BSBS).

International recruitment of healthcare professional participants will be driven again by personal contacts of the study advisory group, but also through a number of international professional societies, including the European Organisation for Research and Treatment of Cancer Brain Tumour Group (EORTC BTG), the European Association of Neuro-

1 Oncology (EANO), the International Consortium on Meningioma (ICOM), the Response Assessment in Neuro-  
2 Oncology Patient-Reported Outcome Group (RANO-PRO), and the Society for Neuro-Oncology (SNO). Key  
3 international collaborators will be asked to distribute the recruitment email within their own neuro-oncology MDT or  
4 tumour board to maximise healthcare professional recruitment. To promote participation by healthcare professionals at  
5 the forefront of meningioma clinical research, the chief investigators of published trials and studies conducted in more  
6 recent years that are identified through the systematic reviews, along with the chief investigators of ongoing clinical  
7 trials and studies will also be contacted and invited to participate.  
8  
9  
10  
11  
12  
13  
14  
15  
16

### 17 Patients and those in caring or supporting roles

18 Patients will be invited to participate in this study through charities, support groups, and social media platforms/forums.  
19 Charities and support groups will be contacted and a named contact for each will be sourced. This contact will circulate  
20 the participant invitation email, which will include a link to the study website (thecosmicproject.org) and the online  
21 DelphiManager platform. We will encourage named contacts to share recruitment details on social media, in order to  
22 recruit participants who may not be on a charity or support group mailing list, but who may interact with a social media  
23 account of the same organisation. The International Brain Tumour Alliance (IBTA), The Brain Tumour Charity (TBTC),  
24 Brainstrust – the brain cancer people, and the Brain Tumour Foundation of Canada will all likely contribute the majority  
25 of opportunities to recruit patient participants as they each maintain a database of patients with intracranial meningioma.  
26 Study social media accounts will also be created to interact directly with potential participants and thereby increase  
27 patient participant recruitment.  
28  
29  
30  
31  
32  
33  
34  
35  
36  
37  
38  
39  
40  
41

### 42 *Sample size:*

43 No specific requirements exist for the minimum number of participants to be included in an eDelphi survey in order to  
44 gain consensus,[33] but it is generally considered that having more participants increases the reliability of the groups  
45 judgement.[34] However, for the purposes of this study, a minimum of 20 participants will be required for each panel  
46 of the eDelphi surveys (Panel 1 - Healthcare professionals, Panel 2 - Patients and those in caring or supporting roles).  
47 We will not limit the number of participants who may wish to register to complete the eDelphi surveys. However, study  
48 registration after closure of round one of the eDelphi surveys will not be permitted.  
49  
50  
51  
52  
53  
54  
55  
56  
57  
58

### 59 *Registration:*



1 The study website (thecosmicproject.org) will contain all necessary information about the study. Registration to  
2 participate as an individual from any stakeholder group will only be possible via the online DelphiManager platform.  
3  
4 This is accessed through an emailed link or through the study website. On attempting to register, a number of screening  
5 questions will be asked. Firstly, registering participants will be asked to identify to which stakeholder group they belong  
6  
7 (healthcare professional and/or researcher, patient with a meningioma, primary carer, family member, charity/support  
8  
9 group representatives, or other stakeholder with a supporting role). Further screening questions will ensure the eligibility  
10  
11 criteria are met within each stakeholder group as previously described. Specific information will then be collected  
12  
13 depending on the stakeholder group chosen.  
14  
15

16  
17  
18  
19 For healthcare professionals, job role will be identified (categorised) along with years in practice (categorised). Country  
20  
21 of clinical practice will be recorded to analyse the international contribution of healthcare professionals, including  
22  
23 differences in outcome scoring by continent or region. This could have implications for dissemination of the final COS.  
24  
25

26  
27  
28 For patients with an intracranial meningioma (all of which rely on a self-reported diagnosis), baseline demographics  
29  
30 will be recorded in order to ensure the patient cohort is representative of the demography of this disease (age, sex). The  
31  
32 number of years since diagnosis (categorised) will be requested to analyse whether this variable affects the scoring of  
33  
34 outcomes. Finally, the level of treatment will be recorded for instance (incidental/untreated, surgical intervention only,  
35  
36 radiotherapy or stereotactic radiosurgery only, pharmacotherapy use, or a combination of surgery and radiotherapy or  
37  
38 stereotactic radiosurgery and/or pharmacotherapy) and number of years since diagnosis and treatment (categorised).  
39  
40 The response to the level of treatment question will determine which eDelphi survey the patient will be encouraged to  
41  
42 complete.  
43  
44

45  
46  
47 For patients, three further pieces of information will be obtained in order to evaluate methods and motivations for  
48  
49 registration for studies such as this. These will include a) the format by which recruitment was achieved, b) the principal  
50  
51 motivator for registration, and c) the most important factors within the recruitment advert for initiating registration. This  
52  
53 data will subsequently be used to analyse and draw conclusions on how best to recruit to eDelphi surveys in the future.  
54  
55

56  
57 For carers or those in a supporting role to patients with a diagnosis of intracranial meningioma, baseline demographics  
58  
59 will be recorded in order to evaluate if differences affect the scoring of outcomes (age, sex). The specific role will be  
60

1 requested (categorised). Whether the role relates to patients with incidental and/or untreated or treated intracranial  
2 meningioma will be requested and this response will determine if the participant will be encouraged to complete one of,  
3  
4 or both eDelphi surveys. The number of years in this role (categorised) will also be requested to analyse whether this  
5  
6 variable affects the scoring of outcomes.  
7  
8  
9

#### 10 *Consent:*

11  
12 Consent to participate in the eDelphi survey/s will be obtained as eConsent by all participants at the point of registration.  
13  
14 A participant information leaflet will be provided in webpage format and for download from the study website, as well  
15  
16 as an email attachment to accompany e-invitations. Sufficient time will be available for participants to choose to partake  
17  
18 in this study prior to closure of the first round of the eDelphi surveys. Similarly, consent to participate in the consensus  
19  
20 meeting will be obtained as eConsent by all participants prior to the online consensus meetings. A participant  
21  
22 information leaflet will again be provided in the same manner. Finally, participants will be offered the opportunity to  
23  
24 consent to be listed as a named individual within a collaborative authorship group; The COSMIC: Intervention  
25  
26 Collaborative and/or The COSMIC: Observation Collaborative.  
27  
28  
29  
30

#### 31 *Surveys:*

32  
33 The two eDelphi surveys will be constructed and delivered through the online DelphiManager platform. The software  
34  
35 was developed by the COMET initiative for this specific purpose. The eDelphi surveys will be piloted with members of  
36  
37 the SAG including PRPs and lay contributors. At the beginning of the eDelphi survey, instructions will be provided on  
38  
39 how to complete the survey. Plain language summaries and videos developed by the COMET 'Patient Participation,  
40  
41 Involvement and engagement group' will be utilised during the registration and eDelphi administration process to  
42  
43 facilitate understanding.  
44  
45  
46  
47  
48

49 Data collection will last for a period of 4 weeks for both rounds of both eDelphi surveys. Participants completing the  
50  
51 COSMIC: Intervention and/or COSMIC: Observation eDelphi surveys will complete both first rounds consecutively.  
52  
53 Reminders will be sent to participants who have not completed the survey/s following registration, and following a  
54  
55 request to complete round two of the survey. Reminders will be sent 2-weeks, 1-week and 48 hours prior to closure of  
56  
57 the surveys. Failure to complete the survey within the 4-week period would be recorded as a failure to complete that  
58  
59 round of the eDelphi survey.  
60

### *Scoring:*

Inclusion of an outcome in either the COSMIC: Intervention or COSMIC: Observation COS requires a large majority agreement from both panels of its critical importance.[35] During round 1 of the eDelphi surveys, participants will rate the importance of each outcome presented using the 9-point Likert scale. It shall be explained to participants that the following scores represent outcome importance, whereby (1-3) is of limited importance, (4-6) is important but not critical, and (7-9) is critically important. Previous studies have demonstrated that a 9-point scale provides adequate discrimination, does not overburden, and is suitable when a subsequent eDelphi round or consensus meeting will take place.[19, 33, 36, 37] Outcomes will be grouped by domain so that similar outcomes are viewed together. Lay terms and definitions will be used with medical terms given in brackets (utilising PRP review). Ordering of grouped outcomes will be randomised to prevent question order from impacting the results.[38]

All items from round one will be carried forward to the second round of each eDelphi survey. In the second round of the eDelphi surveys, round one response from each panel will be presented graphically for each outcome in order to demonstrate the distribution of allocated scores across the Likert scale. This method facilitates consensus building by allowing participants to consider the aggregate responses of their own, and the alternative panel.[39-41] Participants will again rate on a 9-point Likert scale. A change in score will prompt the participant to be offered the chance to explain their reasoning, but this is not mandatory. At each round of the eDelphi surveys and at the consensus meetings, data will be recorded on number of participants invited, number completing the study section, and the measure of response to each outcome. The results of the second round of each eDelphi survey will be used to determine what outcomes are dropped and what outcomes are included in the final COSMIC: Intervention and COSMIC: Observation COS, or discussed at the relevant consensus meeting if undecided.

### *Analysis:*

The definition of consensus which will include an outcome (consensus-in) beyond round two of the eDelphi surveys and during the consensus meetings is 80% or more of participants from both panels scoring an outcome as critical (7-9). Should an outcome be rated as critical by only 50% or less of participants from both panels, the outcome would be dropped (consensus-out). Consensus percentage will be calculated as follows for each panel: No. participants scoring particular outcome as critical/Total number of participants scoring that outcome x 100). Outcomes to be discussed and

1 voted on at the consensus meetings will be those that are neither included or dropped. The same definition of consensus  
2 will apply. All participants who complete both rounds of an eDelphi survey will be eligible to take part in the consensus  
3 meeting associated with that eDelphi survey. Participants eligible to complete both eDelphi surveys, who subsequently  
4 complete both rounds of both eDelphi surveys, will be eligible to take part in both consensus meetings.  
5  
6  
7  
8  
9

#### 10 *Attrition between rounds:*

11  
12 Whilst we endeavour to retain as many participants as possible between rounds one and two of the eDelphi surveys, it  
13 is expected that a proportion will not complete the second round. The attrition rate will be calculated between rounds.  
14  
15 In order to assess for attrition bias, the mean round one scores for the participants completing both rounds of an eDelphi  
16 will be compared with those that only complete the first round. The importance of completing both rounds will be  
17 emphasised. This will be recorded and analysed to compare views of those completing one vs two rounds and discussed  
18 at the consensus meeting.  
19  
20  
21  
22  
23  
24  
25  
26  
27

#### 28 *Consensus meetings*

##### 29 *Research question:*

30  
31 Can two COS be ratified for subsequent use in clinical effectiveness trials for patients with intracranial meningioma and  
32 clinical studies of incidental and untreated intracranial meningioma?  
33  
34  
35  
36  
37

##### 38 *Methods:*

39  
40 Two independent online consensus meetings will take place on two separate days. Each consensus meeting will  
41 commence with a brief presentation to reaffirm the purpose of the meeting. During each consensus meeting, outcomes  
42 categorised as 'consensus-in' and 'consensus-out' across all stakeholder groups will be reviewed first. This will provide  
43 consensus meeting participants the opportunity to discuss those outcomes that have a preliminary decision following  
44 the eDelphi surveys. Review of these outcomes may prompt further rationalisation and/or refinement of definitions. The  
45 primary focus of each meeting will be to discuss those outcomes that are yet to achieve 'consensus-in' or 'consensus-  
46 out'. These outcomes will be presented in batches and discussion encouraged between all consensus meeting participants  
47 in order to move towards consensus. Each outcome will be voted on and further discussion encouraged if necessary.  
48  
49  
50  
51  
52  
53  
54  
55  
56  
57  
58

##### 59 *Sampling and recruitment:*

1 During registration for the eDelphi surveys, participants will be informed of, and asked if they would like to be  
2 considered for invitation to either one or both consensus meetings (where eligible). To be eligible, it will be mandatory  
3 that both rounds of the appropriate eDelphi survey/s are completed. Forty participants will be invited from the UK and  
4 internationally. We will apply stratified purposive sampling, based on the judgement of the SAG to select attendees in  
5 order to balance stakeholders' specialities, participant's disease severity and level of intervention where applicable.  
6  
7  
8  
9

### 10 11 12 *Scoring and analysis:*

13 After each round of discussion, confidential electronic voting will take place involving all consensus meeting  
14 participants. Participants will again be required to vote on a 9-point Likert scale. The same consensus criteria applied  
15 after round two of the eDelphi surveys will also be applied at the consensus meetings. This will include the requirement  
16 that participants from both panels are in independent agreement. Only those outcomes that achieve 'consensus-in' will  
17 be included in the COSMIC: Intervention or COSMIC: Observation COS. Should either consensus meeting not achieve  
18 ratification of a COS, a further meeting would be arranged to achieve this.  
19  
20  
21  
22  
23  
24  
25  
26  
27  
28  
29

### 30 *Patient and Public Involvement*

31 The SAG was formed to guide the management of The COSMIC Project. The SAG is formed from key stakeholder  
32 representatives. The purpose of the SAG is to ensure the aims of the study are delivered at all stages. This is achieved  
33 by obtaining feedback on proposed study methodology, delivery, and research output.  
34  
35  
36  
37  
38  
39

40 The PRP team at The Brain Tumour Charity were contacted to identify potential PRPs. One patient volunteered to join  
41 the SAG and has been involved in the design of this study. A second PRP was put into contact with the study  
42 management group by a member of the SAG. The scope of both COS has been decided with PRP input and both PRPs  
43 have a critical role in delivering this study. One PRP has received treatment, while another has not. All materials  
44 associated with this study will be reviewed by the PRPs for clarity and understanding, including recruitment materials,  
45 consent forms, participant information leaflets, and the study website. The outcome long-lists will be reviewed by the  
46 PRPs for potential missing outcomes, as well as clarity, length and meaning prior to commencement of the eDelphi  
47 surveys.[29] Two further PRPs will be recruited prior to commencement of the eDelphi surveys to facilitate this specific  
48 aim. The eDelphi surveys will be pilot tested with the PRPs. The PRPs will be remunerated for their time. Dissemination  
49 plans will be discussed and reviewed by the PRPs.  
50  
51  
52  
53  
54  
55  
56  
57  
58  
59  
60

## Ethics and Dissemination

This study is registered with the Core Outcome Measures in Effectiveness Trials (COMET) database as study 1508 and accessible at (<https://www.comet-initiative.org/Studies/Details/1508>). Institutional review board (University of Liverpool) sponsorship and ethical approval has been obtained for The COSMIC Project (Ref UoL001601). Participant eConsent will be obtained prior to participation in the eDelphi surveys and online consensus meetings.

The systematic literature reviews and trial registry searches will be published, as well as the final COSMIC: Intervention and COSMIC: Observation COS, and will be freely available. All eDelphi participants completing both rounds of the eDelphi survey for COSMIC: Intervention and/or COSMIC: Observation will be offered the opportunity to be listed as a named individual within a collaborative authorship group; The COSMIC: Intervention Collaborative and/or The COSMIC: Observation Collaborative. Results will be distributed to relevant professional organisations, as well as charity and support groups. National and international presentation of results will take place after ratification of both COS. This project will continue in order to define how and when each core outcome should be measured. Both COS will be subject to refinement with the passage of time, in order to reflect changes in key stakeholder opinion as and when treatment paradigms change.

Multiple organisations support the use of COS (NIHR Health Technology Assessment and WHO handbook for guideline development). The NIHR state in their application form 'where established core outcomes exist they should be included among the list of outcomes unless there is good reason to do otherwise'. This protocol adheres to the 13 minimum Core Outcome Set-Standardised Protocol Items (COS-STAP) recommendations.[42]

## References

1. Ostrom QT, Patil N, Cioffi G, *et al*. CBTRUS Statistical Report: Primary Brain and Other Central Nervous System Tumors Diagnosed in the United States in 2013–2017. *Neuro-Oncology*. 2020;22(Supplement\_1):iv1-iv96.
2. Louis DN, Perry A, Wesseling P, *et al*. The 2021 WHO Classification of Tumors of the Central Nervous System: a summary. *Neuro Oncol*. 2021.
3. Rogers L, Barani I, Chamberlain M, *et al*. Meningiomas: knowledge base, treatment outcomes, and uncertainties. A RANO review. *J Neurosurg*. 2015;122(1):4-23.
4. Goldbrunner R, Stavrinou P, Jenkinson MD, *et al*. EANO guideline on the diagnosis and management of meningiomas. *Neuro-Oncology*. 2021.
5. Goldbrunner R, Minniti G, Preusser M, *et al*. EANO guidelines for the diagnosis and treatment of meningiomas. *The Lancet Oncology*. 2016;17(9):e383-e91.
6. Islim AI, Mohan M, Moon RDC, *et al*. Incidental intracranial meningiomas: a systematic review and meta-analysis of prognostic factors and outcomes. *Journal of Neuro-Oncology*. 2019;142(2):211-21.
7. Behbahani M, Skeie GO, Eide GE, *et al*. A prospective study of the natural history of incidental meningioma—Hold your horses! *Neuro-Oncology Practice*. 2019;6(6):438-50.
8. Mohammad MH, Chavredakis E, Zakaria R, *et al*. A national survey of the management of patients with incidental meningioma in the United Kingdom. *British Journal of Neurosurgery*. 2017;31(4):459-63.
9. Rogers L, Zhang P, Vogelbaum MA, *et al*. Intermediate-risk meningioma: initial outcomes from NRG Oncology RTOG 0539. *J Neurosurg*. 2018;129(1):35-47.
10. Weber DC, Ares C, Villa S, *et al*. Adjuvant postoperative high-dose radiotherapy for atypical and malignant meningioma: A phase-II parallel non-randomized and observation study (EORTC 22042-26042). *Radiother Oncol*. 2018;128(2):260-5.
11. Preusser M, Silvani A, Rhun EL, *et al*. Trabectedin for recurrent WHO grade II or III meningioma: A randomized phase II study of the EORTC Brain Tumor Group (EORTC-1320-BTG). *Journal of Clinical Oncology*. 2019;37(15\_suppl):2007-.
12. Jenkinson MD, Javadpour M, Haylock BJ, *et al*. The ROAM/EORTC-1308 trial: Radiation versus Observation following surgical resection of Atypical Meningioma: study protocol for a randomised controlled trial. *Trials*. 2015;16:519.
13. Rogers L. Phase III Trial of Observation Versus Irradiation for a Gross Totally Resected Grade II Meningioma: NRGONCOLOGY; 2017 [Available from: <https://www.nrgoncology.org/Clinical-Trials/Protocol/nrg-bn003?filter=nrg-bn003>].
14. Brastianos P. Vismodegib and FAK Inhibitor GSK2256098 in Treating Patients With Progressive Meningiomas 2015 [Available from: <https://clinicaltrials.gov/ct2/show/study/NCT02523014>].
15. Jenkinson MD, Ali A, Islim AI, *et al*. Letter to the Editor. Establishing the role of prophylactic antiepileptic drugs in glioma and meningioma surgery. *J Neurosurg*. 2019;131(3):985-7.
16. Islim AI, Kolamunnage-Dona R, Mohan M, *et al*. A prognostic model to personalize monitoring regimes for patients with incidental asymptomatic meningiomas. *Neuro-Oncology*. 2019;22(2):278-89.
17. Eun Jung L, Jeong Hoon K, Eun Suk P, *et al*. A novel weighted scoring system for estimating the risk of rapid growth in untreated intracranial meningiomas. *Journal of Neurosurgery JNS*. 2017;127(5):971-80.
18. Jenkinson MD. 'Meningiomics'-an integration of data on the patient, tumour, extent of resection and molecular pathology to optimise the management and follow-up for meningiomas. *Acta Neurochir (Wien)*. 2019;161(12):2551-2.
19. Williamson PR, Altman DG, Bagley H, *et al*. The COMET Handbook: version 1.0. *Trials*. 2017;18(Suppl 3):280.
20. Williamson PR, Altman DG, Blazeby JM, *et al*. Developing core outcome sets for clinical trials: issues to consider. *Trials*. 2012;13:132.
21. Kirkham JJ, Davis K, Altman DG, *et al*. Core Outcome Set-STAndards for Development: The COS-STAD recommendations. *PLoS Med*. 2017;14(11):e1002447.



22. Ouzzani M, Hammady H, Fedorowicz Z, *et al.* Rayyan-a web and mobile app for systematic reviews. *Syst Rev.* 2016;5(1):210.
23. Young AE, Brookes ST, Avery KNL, *et al.* A systematic review of core outcome set development studies demonstrates difficulties in defining unique outcomes. *J Clin Epidemiol.* 2019;115:14-24.
24. Dodd S, Clarke M, Becker L, *et al.* A taxonomy has been developed for outcomes in medical research to help improve knowledge discovery. *J Clin Epidemiol.* 2018;96:84-92.
25. Macefield RC, Jacobs M, Korfage IJ, *et al.* Developing core outcomes sets: methods for identifying and including patient-reported outcomes (PROs). *Trials.* 2014;15:49.
26. Page MJ, McKenzie JE, Bossuyt PM, *et al.* The PRISMA 2020 statement: an updated guideline for reporting systematic reviews. *BMJ.* 2021;372:n71.
27. Biggane AM, Brading L, Ravaud P, *et al.* Survey indicated that core outcome set development is increasingly including patients, being conducted internationally and using Delphi surveys. *Trials.* 2018;19(1):113.
28. Zamanipoor Najafabadi AH, Peeters MCM, Lobatto DJ, *et al.* Health-related quality of life of cranial WHO grade I meningioma patients: are current questionnaires relevant? *Acta Neurochir (Wien).* 2017;159(11):2149-59.
29. Smith H, Horobin A, Fackrell K, *et al.* Defining and evaluating novel procedures for involving patients in Core Outcome Set research: creating a meaningful long list of candidate outcome domains. *Res Involv Engagem.* 2018;4:8.
30. Keeley T, Williamson P, Callery P, *et al.* The use of qualitative methods to inform Delphi surveys in core outcome set development. *Trials.* 2016;17(1):230.
31. Hasson F, Keeney S, McKenna H. Research guidelines for the Delphi survey technique. *J Adv Nurs.* 2000;32(4):1008-15.
32. Gargon E, Crew R, Burnside G, *et al.* Higher number of items associated with significantly lower response rates in COS Delphi surveys. *J Clin Epidemiol.* 2019;108:110-20.
33. Sinha IP, Smyth RL, Williamson PR. Using the Delphi technique to determine which outcomes to measure in clinical trials: recommendations for the future based on a systematic review of existing studies. *PLoS Med.* 2011;8(1):e1000393.
34. Murphy MK, Black NA, Lamping DL, *et al.* Consensus development methods, and their use in clinical guideline development. *Health Technol Assess.* 1998;2(3):i-iv, 1-88.
35. Jaeschke R, Guyatt GH, Dellinger P, *et al.* Use of GRADE grid to reach decisions on clinical practice guidelines when consensus is elusive. *Bmj.* 2008;337:a744.
36. De Meyer D, Kottner J, Beele H, *et al.* Delphi procedure in core outcome set development: rating scale and consensus criteria determined outcome selection. *J Clin Epidemiol.* 2019;111:23-31.
37. Lange T, Kopkow C, Lützner J, *et al.* Comparison of different rating scales for the use in Delphi studies: different scales lead to different consensus and show different test-retest reliability. *BMC Med Res Methodol.* 2020;20(1):28.
38. Brookes ST, Chalmers KA, Avery KNL, *et al.* Impact of question order on prioritisation of outcomes in the development of a core outcome set: a randomised controlled trial. *Trials.* 2018;19(1):66.
39. Brookes ST, Macefield RC, Williamson PR, *et al.* Three nested randomized controlled trials of peer-only or multiple stakeholder group feedback within Delphi surveys during core outcome and information set development. *Trials.* 2016;17(1):409.
40. Fish R, MacLennan S, Alkhaffaf B, *et al.* "Vicarious thinking" was a key driver of score change in Delphi surveys for COS development and is facilitated by feedback of results. *J Clin Epidemiol.* 2020.
41. Khodyakov D, Chen C. Response changes in Delphi processes: why is it important to provide high-quality feedback to Delphi participants? *J Clin Epidemiol.* 2020;125:160-1.
42. Kirkham JJ, Gorst S, Altman DG, *et al.* Core Outcome Set-STANDARDISED Protocol Items: the COS-STAP Statement. *Trials.* 2019;20(1):116.

## FOOTNOTES



### Authors' contributions

CPM, MDJ conceived the study. CPM, HB, AII, SK, NS, AGM, PRW, MDJ designed the study. CPM drafted the initial study protocol. TSA, HB, SB, ARB, HB, AC, LD, TG, PLG, AII, MJ, SMK, SDK, AGM, MWM, TRM, KO, PP, MP, TS, NS, MJBT, CT, CW, MW, PRW, GZ, AHZN, MDJ provided advice and input on the final protocol. CPM proofread and approved the final manuscript.

### Collaborators

International Consortium on Meningioma: Kenneth Aldape, Abdurrahman I. Islim, Karolyn Au, Jill Barnhartz-Sloan, Wenya Linda Bi, Felix Behling, Priscilla K. Brastianos, Chaya Brodie, Nicholas Butowski, Carlos Carlotti, Ana Castro, Aaron Cohen-Gadol, Marta Couce, Michael D. Cusimano, Francesco DiMeco, Katharine Drummond, Ian F. Dunn, Craig Erker, Michelle Felicella, Daniel M. Fountain, Evanthia Galanis, Norbert Galldiks, Caterina Giannini, Roland Goldbrunner, Brent Griffith, Rintaro Hashizume, C. Oliver Hanemann, Christel Herold-Mende, Luke Hnenny, Craig Horbinski, Raymond Y. Huang, David James, Michael D. Jenkinson, Christine Jungk, Gerhard Jungwirth, Timothy J. Kaufmann, Boris Krischek, Sylvia Kurz, Daniel Lachance, Christian Lafougère, Katrin Lamszus, Ian Lee, Jeff C. Liu, Serge Makarenko, Tathiana Malta, Yasin Mamatjan, Alireza Mansouri, Christian Mawrin, Michael McDermott, Christopher P. Millward, Jennifer Moliterno-Gunel, Andrew Morokoff, David Munoz, Farshad Nassiri, Houtan Noushmehr, Ho-Keung Ng, Arie Perry, Farhad Pirouzmand, Laila M Poisson, Bianca Pollo, Aditya Rangunathan, David Raleigh, Mirjam Renovanz, Franz Ricklefs, Felix Sahn, Andrea Saladino, Antonio Santacrose, Thomas Santarius, Jens Schittenhelm, Christian Schichor, David Schultz, Nils O. Schmidt, Warren Selman, Helen Shih, Andrew Sloan, Julian Spears, Matija Snuderl, James Snyder, Suganth Suppiah, Erik Sulman, Ghazaleh Tabatabai, Marcos Tatagiba, Marco Timmer, Daniela Tirapelli, Joerg C. Tonn, Derek Tsang, Michael A. Vogelbaum, Andreas von Deimling, Tobias Walbert, Simon Walling, Justin Wang, Patrick Y. Wen, Manfred Westphal, Adriana M. Workewych, Stephen Yip, Gabriel Zada, Gelareh Zadeh, Viktor Zhrebitskiy.

### Funding

CPM is funded to complete The COSMIC project by The Brain Tumour Charity grant: 'Deciphering the genetic and epigenetic landscape of clinically aggressive meningiomas' awarded to GZ and MDJ. Grant No. Jxr30103.

### Competing interests

MDJ received a grant from the National Institute for Health Research Health Technology Assessment program for the Radiation versus Observation for Atypical Meningioma (ROAM) trial (NIHR ID: 12/173/14). MDJ and SJM received a grant from the National Institute for Health Research Health Technology Assessment program for Surgeons Trial Of Prophylaxis for Epilepsy in seizure naïve patients with Meningioma (STOP'EM) (NIHR ID: NIHR129748). TS founded and leads the Anaplastic Meningioma International Consortium (AMiCo). TS and MDJ co-founded the British-Irish Meningioma Society (BIMS). MP has received honoraria for lectures, consultation or advisory board participation from the following for-profit companies: Bayer, Bristol-Myers Squibb, Novartis, Gerson Lehrman Group (GLG), CMC Contrast, GlaxoSmithKline, Mundipharma, Roche, BMJ Journals, MedMedia, Astra Zeneca, AbbVie, Lilly, Medahead, Daiichi Sankyo, Sanofi, Merck Sharp & Dome, Tocagen, Adastra. The following for-profit companies have supported clinical trials and contracted research conducted by MP with payments made to his institution: Böhringer-Ingelheim, Bristol-Myers Squibb, Roche, Daiichi Sankyo, Merck Sharp & Dome, Novocure, GlaxoSmithKline, AbbVie. MW has received research grants from Apogenix, Merck, Sharp & Dohme, Merck (EMD) and Quercis, and honoraria for lectures or advisory board participation or consulting from Adastra, Bristol Meyer Squibb, Medac, Merck, Sharp & Dohme, Merck (EMD), Nerviano Medical Sciences, Novartis, Orbus, Philogen and yMabs.

### **Patient and public involvement**

Patients and/or the public were involved in the design, or conduct, or reporting, or dissemination plans of this research.

### **Patient consent for publication**

Not required.

### **Figure legends**

Figure 1 - A flow chart summarising the 5 stages of The COSMIC project.

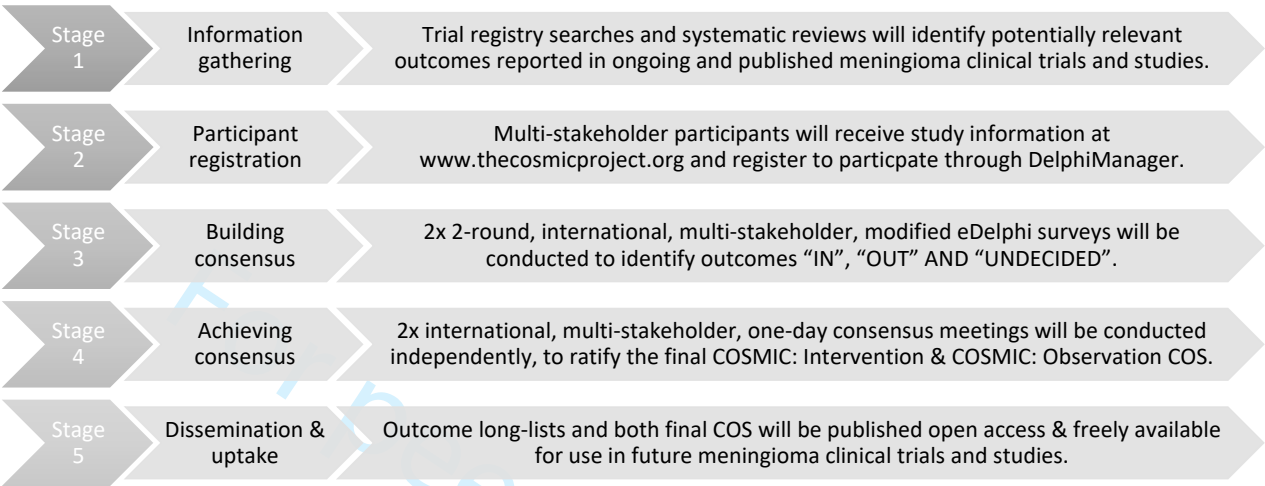

Figure 1 – A flow chart summarising the 5 stages of The COSMIC project.

1  
2  
3  
4  
5  
6  
7  
8  
9  
10  
11  
12  
13  
14  
15  
16  
17  
18  
19  
20  
21  
22  
23  
24  
25  
26  
27  
28  
29  
30  
31  
32  
33  
34  
35  
36  
37  
38  
39  
40  
41  
42  
43  
44  
45  
46

**Database and Trial Registry Searches for COSMIC: Intervention****Medline (Ovid)**

| Search | Query                                                                                                    |
|--------|----------------------------------------------------------------------------------------------------------|
| 1      | meningioma*.tw.                                                                                          |
| 2      | meningioma/                                                                                              |
| 3      | 1 or 2                                                                                                   |
| 4      | exp clinical trial/                                                                                      |
| 5      | random allocation/                                                                                       |
| 6      | double-blind method/                                                                                     |
| 7      | single-blind method/                                                                                     |
| 8      | placebos/                                                                                                |
| 9      | randomized controlled trial.pt.                                                                          |
| 10     | controlled clinical trial.pt.                                                                            |
| 11     | clinical trial.pt.                                                                                       |
| 12     | clinical trial, phase ii.pt.                                                                             |
| 13     | clinical trial, phase iii.pt.                                                                            |
| 14     | clinical trial, phase iv.pt.                                                                             |
| 15     | (clin* adj25 trial*).tw.                                                                                 |
| 16     | (control* adj25 trial*).tw.                                                                              |
| 17     | random*.tw.                                                                                              |
| 18     | ((singl* or doubl* or tripl* or treb*) adj25 (blind* or mask*)).tw.                                      |
| 19     | (phase II or phase 2).tw.                                                                                |
| 20     | (phase III or phase 3).tw.                                                                               |
| 21     | (phase IV or phase 4).tw.                                                                                |
| 22     | placebo*.tw.                                                                                             |
| 23     | 4 or 5 or 6 or 7 or 8 or 9 or 10 or 11 or 12 or 13 or 14 or 15 or 16 or 17 or 18 or 19 or 20 or 21 or 22 |
| 24     | 3 and 23                                                                                                 |
| 25     | exp animals/ not human/                                                                                  |
| 26     | 24 not 25                                                                                                |
| 27     | limit 26 to english                                                                                      |

**EMBASE (Ovid)**

| Search | Query                                                                                                  |
|--------|--------------------------------------------------------------------------------------------------------|
| 1      | 'meningioma*':ti,ab                                                                                    |
| 2      | 'meningioma'/de                                                                                        |
| 3      | #1 or #2                                                                                               |
| 4      | 'clinical trial'/exp                                                                                   |
| 5      | 'randomization'/exp                                                                                    |
| 6      | 'double blind procedure'/de                                                                            |
| 7      | 'single blind procedure'/de                                                                            |
| 8      | 'placebo'/de                                                                                           |
| 9      | (clin* NEAR/25 trial*):ti,ab                                                                           |
| 10     | (control* NEAR/25 trial*):ti,ab                                                                        |
| 11     | 'random*':ti,ab                                                                                        |
| 12     | ((singl* or doubl* or tripl* or treb*) NEAR/25 (blind* or mask*)):ti,ab                                |
| 13     | 'phase II':ti,ab                                                                                       |
| 14     | 'phase 2':ti,ab                                                                                        |
| 15     | 'phase III':ti,ab                                                                                      |
| 16     | 'phase 3':ti,ab                                                                                        |
| 17     | 'phase IV':ti,ab                                                                                       |
| 18     | 'phase 4':ti,ab                                                                                        |
| 19     | 'placebo*':ti,ab                                                                                       |
| 20     | #4 OR #5 OR #6 OR #7 OR #8 OR #9 OR #10 OR #11 OR #12 OR #13 OR #14 OR #15 OR #16 OR #17 OR #18 OR #19 |
| 21     | #3 and #20                                                                                             |
| 22     | #3 AND #20 AND [english]/lim                                                                           |

**PubMed**

| Search | Query                                                                                                                                                   |
|--------|---------------------------------------------------------------------------------------------------------------------------------------------------------|
| 1      | meningioma*[tiab]                                                                                                                                       |
| 2      | meningioma[mh]                                                                                                                                          |
| 3      | #1 or #2                                                                                                                                                |
| 4      | clinical trial[mh]                                                                                                                                      |
| 5      | random allocation[mh]                                                                                                                                   |
| 6      | double-blind method[mh]                                                                                                                                 |
| 7      | single-blind method[mh]                                                                                                                                 |
| 8      | placebos[mh]                                                                                                                                            |
| 9      | randomized controlled trial[pt]                                                                                                                         |
| 10     | controlled clinical trial[pt]                                                                                                                           |
| 11     | clinical trial[pt]                                                                                                                                      |
| 12     | clinical trial, phase ii[pt]                                                                                                                            |
| 13     | clinical trial, phase iii[pt]                                                                                                                           |
| 14     | clinical trial, phase iv[pt]                                                                                                                            |
| 15     | clinical trial*[tiab]                                                                                                                                   |
| 16     | control trial*[tiab]                                                                                                                                    |
| 17     | controlled trial*[tiab]                                                                                                                                 |
| 18     | random*[tiab]                                                                                                                                           |
| 19     | single blind*[tiab]                                                                                                                                     |
| 20     | double blind*[tiab]                                                                                                                                     |
| 21     | triple blind*[tiab]                                                                                                                                     |
| 22     | treble blind*[tiab]                                                                                                                                     |
| 23     | (phase II[tiab] OR phase 2[tiab])                                                                                                                       |
| 24     | (phase III[tiab] OR phase 3[tiab])                                                                                                                      |
| 25     | (phase IV[tiab] OR phase 4[tiab])                                                                                                                       |
| 26     | placebo*[tiab]                                                                                                                                          |
| 27     | #4 OR #5 OR #6 OR #7 OR #8 OR #9 OR #10 OR #11 OR #12 OR #13 OR #14 OR #15 OR #16 OR #17 OR #18 OR #19 OR #20 OR #21 OR #22 OR #23 OR #24 OR #25 OR #26 |
| 28     | #3 and #27                                                                                                                                              |
|        | 28 was searched and English language and Human filters were applied                                                                                     |

**CINAHL Plus**

| Search | Query                                                                             |
|--------|-----------------------------------------------------------------------------------|
| S1     | TI meningioma* OR AB meningioma*                                                  |
| S2     | MH meningioma                                                                     |
| S3     | S1 OR S2                                                                          |
| S4     | MH "Clinical Trials+"                                                             |
| S5     | MH "Random Sample+"                                                               |
| S6     | MH "Placebos"                                                                     |
| S7     | PT randomized controlled trial                                                    |
| S8     | PT clinical trial                                                                 |
| S9     | TI clin* trial* OR AB clin* trial*                                                |
| S10    | TI control* trial* OR AB control* trial*                                          |
| S11    | TI random* OR AB random*                                                          |
| S12    | TI ((singl* OR doubl* OR tripl* OR treb*) AND (blind* OR mask*))                  |
| S13    | AB ((singl* OR doubl* OR tripl* OR treb*) AND (blind* OR mask*))                  |
| S14    | TI (phase II OR phase III OR phase IV OR phase 2 OR phase 3 OR phase 4)           |
| S15    | AB (phase II OR phase III OR phase IV OR phase 2 OR phase 3 OR phase 4)           |
| S16    | TI placebo* OR AB placebo*                                                        |
| S17    | S4 OR S5 OR S6 OR S7 OR S8 OR S9 OR S10 OR S11 OR S12 OR S13 OR S14 OR S15 OR S16 |
| S18    | S3 AND S17                                                                        |
| S19    | S3 AND S17: Narrow by Language: - English                                         |

**Web of Science**

| Search | Query                                                                |
|--------|----------------------------------------------------------------------|
| 1      | TS=(meningioma*)                                                     |
| 2      | TS=(clin* NEAR/25 trial*)                                            |
| 3      | TS=(control* NEAR/25 trial*)                                         |
| 4      | TS=(random*)                                                         |
| 5      | TS=((singl* or doubl* or tripl* or treb*) NEAR/25 (blind* or mask*)) |
| 6      | TS=(phase II or phase 2)                                             |
| 7      | TS=(phase III or phase 3)                                            |
| 8      | TS=(phase IV or phase 4)                                             |
| 9      | TS=(placebo*)                                                        |
| 10     | #2 OR #3 OR #4 OR #5 OR #6 OR #7 OR #8 OR #9                         |
| 11     | #1 AND #10                                                           |
| 12     | (#11) AND LANGUAGE: (English)                                        |



**Cochrane central register of controlled trials**

| Search | Query                                                                                   | Notes                           |
|--------|-----------------------------------------------------------------------------------------|---------------------------------|
| #1     | Meningioma*                                                                             | Title Abstract<br>Keyword       |
| #2     | Meningioma                                                                              | MeSH term: this<br>term only    |
| #3     | #1 OR #2                                                                                |                                 |
| #4     | Clinical trial                                                                          | MeSH term-<br>explode all trees |
| #5     | Random allocation                                                                       | MeSH term this<br>term only     |
| #6     | Double-blind method                                                                     | MeSH term this<br>term only     |
| #7     | Single-blind method                                                                     | MeSH term this<br>term only     |
| #8     | Placebos                                                                                | MeSH term this<br>term only     |
| #9     | clin* NEAR/25 trial*                                                                    | Title Abstract<br>Keyword       |
| #10    | control* NEAR/25 trial*                                                                 | Title Abstract<br>Keyword       |
| #11    | random*                                                                                 | Title Abstract<br>Keyword       |
| #12    | (singl* or doubl* or tripl* or treb*)<br>NEAR/25 (blind* or mask*)                      | Title Abstract<br>Keyword       |
| #13    | phase II OR phase 2                                                                     | Title Abstract<br>Keyword       |
| #14    | phase III OR phase 3                                                                    | Title Abstract<br>Keyword       |
| #15    | phase IV OR phase 4                                                                     | Title Abstract<br>Keyword       |
| #16    | placebo*                                                                                | Title Abstract<br>Keyword       |
| #17    | #4 OR #5 OR #6 OR #7 OR #8 OR #9 OR<br>#10 OR #11 OR #12 OR #13 OR #14 OR<br>#15 OR #16 |                                 |
| #18    | #3 and #17                                                                              |                                 |
|        | Trials filter selected                                                                  |                                 |

1  
2  
3 **ClinicalTrials.gov**  
4

5 Search Condition or disease – meningioma  
6  
7

8 Filters (include) – Recruitment (not yet recruiting, recruiting, enrolling by invitation, active not  
9 recruiting, suspended, completed)  
10

11 Filters (include) – Study type (interventional (clinical trial))  
12

13  
14 Filters (include) – Study phase (phase 2, phase 3, phase 4)  
15  
16

17  
18 **WHO International Clinical Trials Registry Platform**  
19

20 Search – meningioma  
21

22 Filters (include) – Phases (phase 2, phase 3, phase 4)  
23  
24  
25  
26  
27  
28  
29  
30  
31  
32  
33  
34  
35  
36  
37  
38  
39  
40  
41  
42  
43  
44  
45  
46  
47  
48  
49  
50  
51  
52  
53  
54  
55  
56  
57  
58  
59  
60

**Database and Trial Registry Searches for COSMIC: Observation**

**Medline (Ovid)**

| Search | Query                                                                                                                                                                                                                                                           |
|--------|-----------------------------------------------------------------------------------------------------------------------------------------------------------------------------------------------------------------------------------------------------------------|
| 1      | exp meningioma/                                                                                                                                                                                                                                                 |
| 2      | ((central nervous system or CNS or brain* or cerebral* or intracranial or intra-cranial) adj3 (cancer* or tumo?r* or malignan* or neoplas*)).mp.                                                                                                                |
| 3      | 1 or 2                                                                                                                                                                                                                                                          |
| 4      | (glioma* or glial* or glioblastoma* or GBM* or astrocytoma* or ependym* or subependym* or neurocytoma* or pineal* or pineo* or chordoma* or hamartoma* or pituitary* or craniopharyngioma* or neuroblastoma* or medulloblastoma* or lymphoma* or metastat*).mp. |
| 5      | ((lung* or breast* or skin* or blood* or h?ematolg* or dermatolog* or renal* or genitourinary*) adj3 (cancer* or tumo?r* or malignan* or neoplas*)).mp.                                                                                                         |
| 6      | (leuk?emia* or myeloma* melanoma*).mp.                                                                                                                                                                                                                          |
| 7      | 4 or 5 or 6                                                                                                                                                                                                                                                     |
| 8      | 3 not 7                                                                                                                                                                                                                                                         |
| 9      | (asymptomatic or incidental or small or untreated).mp.                                                                                                                                                                                                          |
| 10     | (surgery or radiotherapy or radiosurg* or observ* or conservative treatment or follow-up or natural history or growth).mp.                                                                                                                                      |
| 11     | 8 and 9 and 10                                                                                                                                                                                                                                                  |
| 12     | Limit 11 to English                                                                                                                                                                                                                                             |

**EMBASE (Ovid)**

| Search | Query                                                                                                                                                                                                                                                           |
|--------|-----------------------------------------------------------------------------------------------------------------------------------------------------------------------------------------------------------------------------------------------------------------|
| 1      | exp meningioma/                                                                                                                                                                                                                                                 |
| 2      | ((central nervous system or CNS or brain* or cerebral* or intracranial or intra-cranial) adj3 (cancer* or tumo?r* or malignan* or neoplas*)).mp.                                                                                                                |
| 3      | 1 or 2                                                                                                                                                                                                                                                          |
| 4      | (glioma* or glial* or glioblastoma* or GBM* or astrocytoma* or ependym* or subependym* or neurocytoma* or pineal* or pineo* or chordoma* or hamartoma* or pituitary* or craniopharyngioma* or neuroblastoma* or medulloblastoma* or lymphoma* or metastat*).mp. |
| 5      | ((lung* or breast* or skin* or blood* or h?ematolg* or dermatolog* or renal* or genitourinary*) adj3 (cancer* or tumo?r* or malignan* or neoplas*)).mp.                                                                                                         |
| 6      | (leuk?emia* or myeloma* melanoma*).mp.                                                                                                                                                                                                                          |
| 7      | 4 or 5 or 6                                                                                                                                                                                                                                                     |
| 8      | 3 not 7                                                                                                                                                                                                                                                         |
| 9      | (asymptomatic or incidental or small or untreated).mp.                                                                                                                                                                                                          |
| 10     | (surgery or radiotherapy or radiosurg* or observ* or conservative treatment or follow-up or natural history or growth).mp.                                                                                                                                      |
| 11     | 8 and 9 and 10                                                                                                                                                                                                                                                  |
| 12     | Limit 11 to English                                                                                                                                                                                                                                             |

**CINAHL Plus**

| Search | Query                                                                                                                                                                                                                                                       |
|--------|-------------------------------------------------------------------------------------------------------------------------------------------------------------------------------------------------------------------------------------------------------------|
| 1      | Meningioma                                                                                                                                                                                                                                                  |
| 2      | ((central nervous system or CNS or brain* or cerebral* or intracranial or intra-cranial) N3 (cancer* or tumo?r* or malignan* or neoplas*))                                                                                                                  |
| 3      | 1 or 2                                                                                                                                                                                                                                                      |
| 4      | (glioma* or glial* or glioblastoma* or GBM* or astrocytoma* or ependym* or subependym* or neurocytoma* or pineal* or pineo* or chordoma* or hamartoma* or pituitary* or craniopharyngioma* or neuroblastoma* or medulloblastoma* or lymphoma* or metastat*) |
| 5      | ((lung* or breast* or skin* or blood* or h?ematolg* or dermatolog* or renal* or genitourinary*) N3 (cancer* or tumo?r* or malignan* or neoplas*))                                                                                                           |
| 6      | (leuk?emia* or myeloma* melanoma*)                                                                                                                                                                                                                          |
| 7      | 4 or 5 or 6                                                                                                                                                                                                                                                 |
| 8      | 3 not 7                                                                                                                                                                                                                                                     |
| 9      | (asymptomatic or incidental or small or untreated)                                                                                                                                                                                                          |
| 10     | (surgery or radiotherapy or radiosurg* or observ* or conservative treatment or follow-up or natural history or growth)                                                                                                                                      |
| 11     | 8 and 9 and 10                                                                                                                                                                                                                                              |
| 12     | Limit 11 to English                                                                                                                                                                                                                                         |

**Cochrane central register of controlled trials**

| Search | Query                                                                                                                                                                                                                                                       |
|--------|-------------------------------------------------------------------------------------------------------------------------------------------------------------------------------------------------------------------------------------------------------------|
| 1      | Meningioma                                                                                                                                                                                                                                                  |
| 2      | ((central nervous system or CNS or brain* or cerebral* or intracranial or intra-cranial) NEAR/3 (cancer* or tumo?r* or malignan* or neoplas*))                                                                                                              |
| 3      | 1 or 2                                                                                                                                                                                                                                                      |
| 4      | (glioma* or glial* or glioblastoma* or GBM* or astrocytoma* or ependym* or subependym* or neurocytoma* or pineal* or pineo* or chordoma* or hamartoma* or pituitary* or craniopharyngioma* or neuroblastoma* or medulloblastoma* or lymphoma* or metastat*) |
| 5      | ((lung* or breast* or skin* or blood* or h?ematolg* or dermatolog* or renal* or genitourinary*) NEAR/3 (cancer* or tumo?r* or malignan* or neoplas*))                                                                                                       |
| 6      | (leuk?emia* or myeloma* melanoma*)                                                                                                                                                                                                                          |
| 7      | 4 or 5 or 6                                                                                                                                                                                                                                                 |
| 8      | 3 not 7                                                                                                                                                                                                                                                     |
| 9      | (asymptomatic or incidental or small or untreated)                                                                                                                                                                                                          |
| 10     | (surgery or radiotherapy or radiosurg* or observ* or conservative treatment or follow-up or natural history or growth)                                                                                                                                      |
| 11     | 8 and 9 and 10                                                                                                                                                                                                                                              |
| 12     | Limit 11 to English                                                                                                                                                                                                                                         |

1  
2  
3 **ClinicalTrials.gov**  
4

5 Search Condition or disease – meningioma  
6  
7

8 Filters (include) – Recruitment (not yet recruiting, recruiting, enrolling by invitation, active not  
9 recruiting, suspended, completed)  
10

11 Filters (include) – Study type (observational)  
12  
13  
14

15 **WHO International Clinical Trials Registry Platform**  
16

17 Search – meningioma  
18

19 Filters - None  
20  
21  
22  
23  
24  
25  
26  
27  
28  
29  
30  
31  
32  
33  
34  
35  
36  
37  
38  
39  
40  
41  
42  
43  
44  
45  
46  
47  
48  
49  
50  
51  
52  
53  
54  
55  
56  
57  
58  
59  
60

For peer review only

# BMJ Open

## Development of 'Core Outcome Sets' for Meningioma in Clinical Studies (The COSMIC Project): Protocol for two Systematic Literature Reviews, eDelphi Surveys and Online Consensus Meetings.

|                               |                                                                                                                                                                                                                                                                                                                                                                                                                                                                                                                                                                                                                                                                                                                                                                                                                                                                                                                                                                                                                                                                                                                                                                                                                                                                                                                                                                                                                                                                                                                                                                                                                                                                                                                                                                                                                                                                                                                                                                                                                                                                                                  |
|-------------------------------|--------------------------------------------------------------------------------------------------------------------------------------------------------------------------------------------------------------------------------------------------------------------------------------------------------------------------------------------------------------------------------------------------------------------------------------------------------------------------------------------------------------------------------------------------------------------------------------------------------------------------------------------------------------------------------------------------------------------------------------------------------------------------------------------------------------------------------------------------------------------------------------------------------------------------------------------------------------------------------------------------------------------------------------------------------------------------------------------------------------------------------------------------------------------------------------------------------------------------------------------------------------------------------------------------------------------------------------------------------------------------------------------------------------------------------------------------------------------------------------------------------------------------------------------------------------------------------------------------------------------------------------------------------------------------------------------------------------------------------------------------------------------------------------------------------------------------------------------------------------------------------------------------------------------------------------------------------------------------------------------------------------------------------------------------------------------------------------------------|
| Journal:                      | <i>BMJ Open</i>                                                                                                                                                                                                                                                                                                                                                                                                                                                                                                                                                                                                                                                                                                                                                                                                                                                                                                                                                                                                                                                                                                                                                                                                                                                                                                                                                                                                                                                                                                                                                                                                                                                                                                                                                                                                                                                                                                                                                                                                                                                                                  |
| Manuscript ID                 | bmjopen-2021-057384.R2                                                                                                                                                                                                                                                                                                                                                                                                                                                                                                                                                                                                                                                                                                                                                                                                                                                                                                                                                                                                                                                                                                                                                                                                                                                                                                                                                                                                                                                                                                                                                                                                                                                                                                                                                                                                                                                                                                                                                                                                                                                                           |
| Article Type:                 | Protocol                                                                                                                                                                                                                                                                                                                                                                                                                                                                                                                                                                                                                                                                                                                                                                                                                                                                                                                                                                                                                                                                                                                                                                                                                                                                                                                                                                                                                                                                                                                                                                                                                                                                                                                                                                                                                                                                                                                                                                                                                                                                                         |
| Date Submitted by the Author: | 29-Mar-2022                                                                                                                                                                                                                                                                                                                                                                                                                                                                                                                                                                                                                                                                                                                                                                                                                                                                                                                                                                                                                                                                                                                                                                                                                                                                                                                                                                                                                                                                                                                                                                                                                                                                                                                                                                                                                                                                                                                                                                                                                                                                                      |
| Complete List of Authors:     | <p>millward, Christopher; University of Liverpool, Institute of Systems, Molecular, &amp; Integrative Biology; The Walton Centre NHS Foundation Trust, Department of Neurosurgery</p> <p>Armstrong, Terri S. ; National Cancer Institute, Neuro-Oncology Branch, Center for Cancer Research</p> <p>Barrington, Heather; University of Liverpool, Health Data Science</p> <p>Bell, Sabrina; Brain Tumor Charity</p> <p>Brodbelt, Andrew; University of Liverpool, Institute of Systems, Molecular, &amp; Integrative Biology; The Walton Centre NHS Foundation Trust, Department of Neurosurgery</p> <p>Bulbeck, Helen; Brainstrust</p> <p>Crofton, Anna; The Walton Centre NHS Foundation Trust, Department of Neurosurgery</p> <p>Dirven, Linda; Leiden University Medical Center, Department of Neurology; Medical Centre Haaglanden, Department of Neurology</p> <p>Georgious, Theo; Brain Tumor Charity</p> <p>Grundy, Paul; University Hospital Southampton NHS Foundation Trust, Department of Neurosurgery</p> <p>Islim, Abdurrahman ; University of Liverpool, Institute of Systems, Molecular, &amp; Integrative Biology; The Walton Centre NHS Foundation Trust, Department of Neurosurgery</p> <p>Javadpour, Mohsen; Beaumont Hospital, National Centre for Neurosurgery</p> <p>Keshwara, Sumirat M.; University of Liverpool, Institute of Systems, Molecular, &amp; Integrative Biology; The Walton Centre NHS Foundation Trust, Department of Neurosurgery</p> <p>Koszdin, Shelli; Palo Alto VA Medical Center, Pharmacy</p> <p>Marson, Tony; University of Liverpool, Institute of Systems, Molecular, &amp; Integrative Biology; The Walton Centre NHS Foundation Trust, Department of Neurology</p> <p>McDermott, Michael W.; Florida International University, Division of Neuroscience</p> <p>Meling, Torstein R.; Geneva University Hospitals, Department of Neurosurgery</p> <p>Oliver, Kathy; IBTA</p> <p>Plaha, Puneet; University of Oxford, Nuffield Department of Surgical Sciences</p> <p>Preusser, Matthias; Medical University of Vienna, Division of Oncology,</p> |



|                                    |                                                                                                                                                                                                                                                                                                                                                                                                                                                                                                                                                                                                                                                                                                                                                                                                                                                                                                                                                                                                                                                                                                                                                                                                               |
|------------------------------------|---------------------------------------------------------------------------------------------------------------------------------------------------------------------------------------------------------------------------------------------------------------------------------------------------------------------------------------------------------------------------------------------------------------------------------------------------------------------------------------------------------------------------------------------------------------------------------------------------------------------------------------------------------------------------------------------------------------------------------------------------------------------------------------------------------------------------------------------------------------------------------------------------------------------------------------------------------------------------------------------------------------------------------------------------------------------------------------------------------------------------------------------------------------------------------------------------------------|
|                                    | <p>Department of Medicine<br/> Santarius, Thomas; Addenbrooke's Hospital, Department of<br/> Neurosurgery<br/> Srikandarajah, Nisaharan; University of Liverpool, Institute of Systems,<br/> Molecular, &amp; Integrative Biology; The Walton Centre NHS Foundation<br/> Trust, Department of Neurosurgery<br/> Taphoorn, Martin J.B.; Leiden University Medical Center, Department of<br/> Neurology; Medical Centre Haaglanden, Department of Neurology<br/> Turner, Carole; Addenbrooke's Hospital, Department of Neurosurgery<br/> Watts, Colin; University of Birmingham, Institute of Cancer and Genomic<br/> Studies<br/> Weller, Michael; University of Zurich, Department of Neurology<br/> Williamson, Paula; University of Liverpool, Institute of Population Health<br/> Zadeh, Gelareh; University of Toronto, Department of Surgery<br/> Zamanipour Najafabadi, Amir H.; Leiden University Medical Center,<br/> University Neurosurgical Center Holland<br/> Jenkinson, Michael; The Walton Centre NHS Foundation Trust; University<br/> of Liverpool, Institute of Systems, Molecular, &amp; Integrative Biology<br/> ICOM, International Consortium on Meningiomas; University of Toronto</p> |
| <b>Primary Subject<br>Heading</b>: | Oncology                                                                                                                                                                                                                                                                                                                                                                                                                                                                                                                                                                                                                                                                                                                                                                                                                                                                                                                                                                                                                                                                                                                                                                                                      |
| Secondary Subject Heading:         | Surgery, Pharmacology and therapeutics, Neurology                                                                                                                                                                                                                                                                                                                                                                                                                                                                                                                                                                                                                                                                                                                                                                                                                                                                                                                                                                                                                                                                                                                                                             |
| Keywords:                          | Neurosurgery < SURGERY, Clinical trials < THERAPEUTICS, Neurological<br>oncology < NEUROLOGY                                                                                                                                                                                                                                                                                                                                                                                                                                                                                                                                                                                                                                                                                                                                                                                                                                                                                                                                                                                                                                                                                                                  |
|                                    |                                                                                                                                                                                                                                                                                                                                                                                                                                                                                                                                                                                                                                                                                                                                                                                                                                                                                                                                                                                                                                                                                                                                                                                                               |

SCHOLARONE™  
Manuscripts

## Submission of manuscript to BMJ Open

1  
2  
3  
4  
5 Development of 'Core Outcome Sets' for Meningioma in Clinical Studies (The COSMIC Project):

6  
7 Protocol for two Systematic Literature Reviews, eDelphi Surveys and Online Consensus Meetings.  
8  
9  
10  
11  
12  
13  
14  
15  
16  
17  
18  
19  
20  
21  
22  
23  
24  
25  
26  
27  
28  
29  
30  
31  
32  
33  
34  
35  
36  
37  
38  
39  
40  
41  
42  
43  
44  
45  
46  
47  
48  
49  
50  
51  
52  
53  
54  
55  
56  
57  
58  
59  
60

For peer review only

## Authors & Affiliations

Christopher P. Millward\*

Terri S. Armstrong

Heather Barrington

Sabrina Bell

Andrew R. Brodbelt

Helen Bulbeck

Anna Crofton

Linda Dirven

Theo Georgious

Paul Grundy

Abdurrahman I. Islim

Mohsen Javadpour

Sumirat M. Keshwara

Shelli Diane Koszdin

Anthony G. Marson

Michael W. McDermott

Torstein R. Meling

Kathy Oliver

Puneet Plaha

Matthias Preusser

Thomas Santarius

Nisaharan Srikandarajah

Martin J.B. Taphoorn

Carole Turner

Colin Watts

Michael Weller

Paula R. Williamson

Gelareh Zadeh

Amir H. Zamanipoor Najafabadi

Michael D. Jenkinson

On behalf of EORTC BTG, ICOM, EANO, SNO, RANO-PRO, BNOS, SBNS, BIMS, TBTC, International Brain Tumour Alliance, Brainstrust, and Brain Tumour Foundation of Canada.

- 1 • Institute of Systems, Molecular, & Integrative Biology, University of Liverpool, UK (CPM, ARB, AII, SMK, AGM,  
2 NS, MDJ).
- 3 • Department of Neurosurgery, The Walton Centre NHS Foundation Trust, Liverpool, UK (CPM, ARB, AC, AII,  
4 SMK, NS, MDJ).
- 5 • Neuro-Oncology Branch, Center for Cancer Research, National Cancer Institute, Bethesda, Maryland, USA (TSA)
- 6 • Institute of Population Health, University of Liverpool, UK (HB, PRW)
- 7 • The Brain Tumour Charity (SB, TG).
- 8 • Brainstrust – the brain cancer people (HB).
- 9 • Department of Neurology, Leiden University Medical Center, The Netherlands (LD, MJBT).
- 10 • Department of Neurology, Haaglanden Medical Center, The Hague, The Netherlands (LD, MJBT).
- 11 • Department of Neurosurgery, University Hospital Southampton, UK (PG).
- 12 • National Centre for Neurosurgery, Beaumont Hospital, Dublin, Ireland (MJ).
- 13 • Veterans Affairs Healthcare System, Palo Alto, California, USA (SDK)
- 14 • Department of Neurology, The Walton Centre NHS Foundation Trust, Liverpool, UK (AGM).
- 15 • Division of Neuroscience, Florida International University, Florida, USA (MWM).
- 16 • Department of Neurosurgery, Geneva University Hospital, Geneva, Switzerland (TRM).
- 17 • International Brain Tumour Alliance (KO).
- 18 • Nuffield Department of Surgical Sciences, University of Oxford, UK (PP).
- 19 • Division of Oncology, Department of Medicine, Medical University of Vienna, Austria (MP).
- 20 • Department of Neurosurgery, Addenbrooke's Hospital & University of Cambridge, UK (TS, CT).
- 21 • Institute of Cancer and Genomic Sciences, University of Birmingham, UK (CW).
- 22 • Department of Neurology, University Hospital and University of Zurich, Switzerland (MW).
- 23 • Department of Surgery, University of Toronto, Canada (GZ).
- 24 • University Neurosurgical Center Holland, Leiden University Medical Centre, Haaglanden Medical Center, Haga  
25 Teaching Hospitals, Leiden and The Hague, The Netherlands (AHZN).

### 44 **\*Corresponding author**

45 Mr Christopher P. Millward

46 Department of Neurosurgery

47 The Walton Centre NHS Foundation Trust

48 Lower Lane

49 Liverpool, L9 7LJ

50 Emails: [drcpm@liverpool.ac.uk](mailto:drcpm@liverpool.ac.uk)

## Abstract

### Introduction:

Meningioma is the most common primary intracranial tumour in adults. The majority are non-malignant, but a proportion behave more aggressively. Incidental/minimally symptomatic meningioma are often managed by serial imaging. Symptomatic meningiomas, those that threaten neurovascular structures or demonstrate radiological growth, are usually resected as first-line management strategy. For patients in poor clinical condition, or with inoperable, residual, or recurrent disease, radiotherapy is often utilised as primary or adjuvant treatment. Effective pharmacotherapy treatments do not currently exist. There is heterogeneity in the outcomes reported in meningioma clinical studies. Two 'Core Outcome Sets' (COS) will be developed, (COSMIC: Intervention) for use in meningioma clinical effectiveness trials, and (COSMIC: Observation) for use in clinical studies of incidental/untreated meningioma.

### Methods and Analysis:

Two systematic literature reviews and trial registry searches will identify outcomes reported in published and ongoing 1) meningioma clinical effectiveness trials, and 2) clinical studies of incidental/untreated meningioma. Outcomes include those that are clinician-reported, patient-reported, caregiver-reported, and based on objective tests (e.g. neurocognitive tests), as well as measures of progression and survival. Outcomes will be deduplicated and categorised to generate two long-lists. The two long-lists will be prioritised through two, 2-round, international, modified eDelphi surveys including meningioma patients, healthcare professionals, researchers, and those in caring/supporting roles. The two final COS will be ratified through two, one-day online consensus meetings, with representation from all stakeholder groups.

### Ethics and Dissemination:

Institutional review board (University of Liverpool) approval was obtained for the conduct of this study. Participant eConsent will be obtained prior to participation in the eDelphi surveys and consensus meetings. The eDelphi long-lists and two final COS will be published and freely available.

**Key words:** Core Outcome Set, Meningioma, Clinical trial

**Trial registration number:**

This study is registered with the Core Outcome Measures in Effectiveness Trials (COMET) database as study 1508 and accessible at (<https://www.comet-initiative.org/Studies/Details/1508>). This study has University of Liverpool sponsorship and ethical approval (Ref UoL001601).

**Abstract Word Count: 270****Manuscript Word Count: 8397**

For peer review only

## STRENGTHS AND LIMITATIONS OF THIS STUDY

- Comprehensive systematic literature reviews will identify outcomes reported in published intracranial meningioma clinical effectiveness trials and clinical studies of incidental/untreated intracranial meningioma (reported according to Preferred Reporting Items for Systematic Reviews and Meta-Analyses (PRISMA) guidelines).
- Unique outcomes (classified according to the Core Outcome Measures in Effectiveness Trials (COMET) taxonomy) will be prioritised through consensus methodology including two, 2-round, international, multi-stakeholder, modified eDelphi surveys, followed by two online consensus meetings, to ratify the COSMIC: Intervention and COSMIC: Observation COS.
- COS for intracranial meningioma do not exist but are urgently needed to ensure core outcomes relevant to meningioma patients, healthcare professionals, researchers, and other key stakeholders are measured in future meningioma clinical trials and studies.
- ‘How’ and ‘when’ each outcome is measured is beyond the scope of this work and will be the focus of future research.

## Introduction

Meningioma is the most common primary intracranial tumour accounting for approximately 38% of all primary tumours of the central nervous system, with an estimated age-adjusted incidence of 8.8 per 100,000 population per year.[1] Meningioma are more than twice as common in females (12 vs 5.3 per 100,000 population), although boys are more likely to be affected than girls.[1] Median age at diagnosis is 66 years, and incidence increases with age.[1] The World Health Organization (WHO) classification of tumours of the central nervous system describes three grades of meningioma, with the most recent distribution by grade as follows; 80.4% benign (WHO grade 1), 17.9% atypical (WHO grade 2) and 1.6% malignant (WHO grade 3).[1, 2] All meningiomas have a long-term risk of recurrence, as well as progression to a higher tumour grade.

For symptomatic meningioma, those that threaten neurovascular structures or demonstrate growth on interval imaging, a treatment intervention is warranted. Surgical resection is often the preferred first-line management strategy; however, for poor surgical candidates, patients with inoperable, residual, or recurrent disease, radiotherapy may be used as primary or adjuvant treatment to obtain disease control. Despite studies investigating different agents, there are no effective pharmacotherapy treatments.[3, 4] On the other hand, incidental intracranial meningioma may never require treatment. International consensus guidelines recommend interval MRI monitoring, however details surrounding the intervals and duration of follow-up, and indications for treatment are lacking.[5] A very low percentage of patients with an incidental intracranial meningioma develop symptoms during follow-up; 0-8%, however, the risk of growth has been reported to be between 10% and 70%.[6, 7] This heterogeneity in imaging behaviour leads to management decisions recommended to patients varying between active long-term MRI and clinical monitoring or upfront treatment with surgery or radiotherapy.[8]

### Intracranial meningioma clinical effectiveness trials

Clinical effectiveness trials in intracranial meningioma are sparse, but important research questions remain to be answered, especially for recurrent and high-grade meningioma. Two phase 2 studies investigating the efficacy of adjuvant radiotherapy following surgical resection of high-grade meningioma have been reported; Radiation Therapy Oncology Group (RTOG) 0539 [9] and the European Organisation for Research and Treatment of Cancer (EORTC) 22042,[10] as well as a phase 2 trial of trabectedin for recurrent grade 2/3 meningioma.[11] There are currently two



1 phase 3 randomized controlled trials underway to establish the role of radiotherapy after gross-total resection of WHO  
2 grade 2 meningioma; ROAM/EORTC 1308 [12] and NRG-BN003,[13] as well as a phase 2 trial of Vismodegib, the  
3 Focal Adhesion Kinase (FAK) inhibitor GSK2256098, and Capivasertib for progressive meningioma.[14] There are  
4 other clinical effectiveness trials in development, such as STOP'EM which will aim to establish the role of prophylactic  
5 levetiracetam in seizure naïve patients undergoing resection of meningioma.[15] However, the outcomes measured and  
6 reported in meningioma clinical effectiveness trials are not standardised.  
7  
8  
9  
10  
11  
12  
13  
14

### 15 **Clinical studies of incidental and untreated intracranial meningioma**

16  
17 Clinical studies of incidental and untreated intracranial meningioma are rare. Recent work has attempted to accurately  
18 define risk factors for untreated meningioma growth. The **Asan Intracranial Meningioma Scoring System (AIMSS)** and  
19 **Incidental Meningioma: Prognostic Analysis Using Patient Comorbidity and MRI Tests (IMPACT)** calculator stratify  
20 patients based on the imaging features of a meningioma into risk groups.[16, 17] Albeit both scoring systems require  
21 validation with external datasets, they underpin clinical equipoise in patients with an untreated meningioma and pave  
22 the way for prospective clinical studies. Patients with meningiomas at high risk of progression e.g.  $\geq 3$  cm, T2  
23 hyperintense and with peri-tumoural signal change (indicative of vasogenic oedema) are likely to benefit from an  
24 intervention trial, whereas patients with low- or medium-risk meningiomas may draw more benefit from trials that  
25 compare different monitoring strategies. Similarly, the outcomes measured and reported in clinical studies of incidental  
26 and untreated intracranial meningioma are also not standardised.  
27  
28  
29  
30  
31  
32  
33  
34  
35  
36  
37  
38  
39  
40

### 41 **Rationale for the development of Core Outcome Sets for intracranial meningioma**

42 Interest in meningioma is increasing, in part due to the 'meningiomics' revolution, which offers the prospect of treatment  
43 arm stratification by molecular and genomic aberration, and the potential for personalised management options.[14, 18]  
44 With this comes the difficulty of recruitment of a sufficient number of patients into treatment arms, for instance, when  
45 stratification is by a single point mutation present in only 5-10% of what is already a rare disease. For this reason, future  
46 meningioma clinical effectiveness trials will need to be 1) global, multi-institutional efforts 2) allow meaningful  
47 comparison across studies in order to determine comparative efficacy, 3) measure the outcomes that are important to all  
48 stakeholders including meningioma patients, and 4) resourceful and not performed in duplicate, or near duplicate with  
49 different outcomes measured and reported for similar research questions. The development of a core outcome set (COS)  
50 for meningioma to be used in future clinical effectiveness trials will enable the alignment of these aims.  
51  
52  
53  
54  
55  
56  
57  
58  
59  
60

1  
2 There is also increasing interest in asymptomatic patients with an incidentally discovered intracranial meningioma, who  
3  
4 may never require treatment. The balance between observation and intervention, and the benefit vs. harm of each  
5  
6 strategy, is not yet clear. Future prospective clinical studies could benefit from the implementation of a COS that is  
7  
8 specific to this patient group, in recognition of the specific outcomes that are likely to be considered core.  
9

10  
11  
12 A COS is defined as the *minimum* set of outcomes that should be measured and reported in all clinical trials of a specific  
13  
14 condition.[19] To date, over 400 COS have been developed for various diseases and conditions, with over 300 in  
15  
16 progress, and they are increasingly recognized as critical to the design of clinical research.[20] None have yet been  
17  
18 developed within the field of neuro-oncology. The aim of this project is to develop two COS for intracranial  
19  
20 meningioma; one for clinical effectiveness trials (COSMIC: Intervention) and one for observational studies (COSMIC:  
21  
22 Observation). This novel methodological approach has been chosen because meningioma is a highly heterogeneous  
23  
24 disease, and we assume that the outcomes likely to be considered core by key stakeholders, will be somewhat different  
25  
26 for a COS developed for interventional, in comparison to observational studies. This protocol describes the development  
27  
28 of both COS. The COS should be appropriately utilised in future intracranial meningioma clinical effectiveness trials  
29  
30 across the breadth of interventions being tested, and future clinical studies of incidental and untreated intracranial  
31  
32 meningioma.  
33  
34

35  
36  
37  
38 The specific objectives of this project are as follows:  
39  
40  
41

- 42 1. Identify outcomes reported in ongoing and published meningioma clinical effectiveness trials and clinical  
43  
44 studies of incidental and untreated intracranial meningioma, through trial registry searches and two systematic  
45  
46 literature reviews.  
47
- 48 2. Recruit patients with an intracranial meningioma, healthcare professionals, researchers & other key stakeholders  
49  
50 in caring or supporting roles to one of, or both, 2-round, international, modified eDelphi surveys to reduce long-  
51  
52 lists of potentially relevant unique outcomes.  
53
- 54 3. Conduct two independent, one-day, international, multi-stakeholder, online consensus meetings to ratify the  
55  
56 COSMIC: Intervention and COSMIC: Observation COS.  
57  
58  
59  
60

- 1  
2  
3  
4  
5  
6  
7  
8  
9
4. Make freely available and disseminate widely, a COS for use in all future intracranial meningioma clinical effectiveness trials, and a COS for use in all future clinical studies of incidental and untreated intracranial meningioma.

### 10 11 12 13 14 15 16 17 18 19 20 21 22 23 24 25 26 27 28 29 30 31 32 33 34 35 36 37 38 39 40 41 42 43 44 45 46

#### **Scope of the COS**

For a COS to be selected and utilised by clinical triallists, the scope must be clear (research or practice setting(s) in which the COS is to be applied, and the health condition(s), populations(s), and intervention(s) covered by the COS). A COS with a broad scope may lack relevance for heterogeneous disease entities, but if scope is too narrow, it may never be used. Core Outcome Set Standards for Development (COS-STAD) recommendations have been described; the product of an international consensus process involving experienced COS developers.[21] The purpose of these 11 minimum standards is to facilitate COS development by providing a framework to consider when project planning.

Such is the importance of scope for the successful development and uptake of a COS, that The COSMIC Project encompasses the development of two distinct COS for the same health condition. The scope of both COS is defined within the 11 minimum COS-STAD recommendations (Table 1). In summary, the COSMIC: Intervention COS will be developed for use in phase 2 and later, intracranial meningioma clinical effectiveness trials in adults, that are designed to inform clinical decision making and improve clinical care for patients. The COS will be applicable to all interventions utilised to treat the disease including surgical resection, radiotherapy, stereotactic radiosurgery, pharmacotherapy, perioperative care, and supportive treatments; any of which may be used in isolation or in combination. Conversely, the COSMIC: Observation COS will be developed for use in observational clinical studies of incidental and untreated intracranial meningioma, that are designed to inform monitoring and decision to treat strategies.

#### **Registration**

47  
48  
49  
50  
51  
52  
53  
54  
55  
56  
57  
58  
59  
60

The study is registered with the Core Outcome Measures in Effectiveness Trials database as study 1508 accessible at (<https://www.comet-initiative.org/Studies/Details/1508>). This study has University of Liverpool Sponsorship and ethical approval (Ref UoL001601).

| Domain                | Standard | Methodology                                                                                 | COSMIC: Intervention                                                                                                                                                                                                                                                          | COSMIC: Observation                                                                                                                                                                                                                                                                                         |
|-----------------------|----------|---------------------------------------------------------------------------------------------|-------------------------------------------------------------------------------------------------------------------------------------------------------------------------------------------------------------------------------------------------------------------------------|-------------------------------------------------------------------------------------------------------------------------------------------------------------------------------------------------------------------------------------------------------------------------------------------------------------|
| Scope specification   | 1        | The research or practice setting(s) in which the COS is to be applied                       | Later phase clinical effectiveness trials that will inform clinical decision making.                                                                                                                                                                                          | Clinical studies of incidental and untreated intracranial meningioma that will inform clinical decision making.                                                                                                                                                                                             |
|                       | 2        | The health condition(s) covered by the COS                                                  | Sporadic intracranial meningioma requiring intervention, including multiple meningioma and those with SMARCE1 related familial meningioma, but excluding NF2-associated meningioma.                                                                                           | Incidental and untreated intracranial meningioma (including those which are minimally symptomatic).                                                                                                                                                                                                         |
|                       | 3        | The population(s) covered by the COS                                                        | Human adults aged 18 or above.                                                                                                                                                                                                                                                | Human adults aged 18 or above.                                                                                                                                                                                                                                                                              |
|                       | 4        | The intervention(s) covered by the COS                                                      | Interventions including surgical resection, radiotherapy, stereotactic radiosurgery, chemotherapy, perioperative care and supportive treatments; any of which may be in isolation or in combination with each other.                                                          | Active monitoring only as an intervention, but not treatment for an intracranial meningioma.                                                                                                                                                                                                                |
| Stakeholders involved | 5        | Those who will use the COS in research                                                      | Clinical trialists who manage patients with intracranial meningioma. They are included in standard 6.                                                                                                                                                                         | Clinical trialists who manage patients with intracranial meningioma. They are included in standard 6.                                                                                                                                                                                                       |
|                       | 6        | Healthcare professionals with experience of patients with the condition                     | This will include clinicians from multiple subspecialties and non-clinician healthcare professionals with active involvement in the care of patients with intracranial meningioma.                                                                                            | This will include clinicians from multiple subspecialties and non-clinician healthcare professionals with active involvement in the care of patients with intracranial meningioma.                                                                                                                          |
|                       | 7        | Patients with the condition or their representatives                                        | Patients with a diagnosis of intracranial meningioma who have received treatment will be included, along with relatives and carers of such patients.                                                                                                                          | Patients with a diagnosis of incidental intracranial meningioma who have not received treatment will be included, along with relatives and carers of such patients.                                                                                                                                         |
| Consensus process     | 8        | The initial list of outcomes considered both healthcare professionals' and patients' views. | A trial registry search and systematic literature review of intracranial meningioma trial outcomes will consider healthcare professionals' views, whilst Patient Research Partner input and published semi-structured interviews with patients will consider patients' views. | A trial registry search and systematic literature review of clinical studies of incidental and untreated intracranial meningioma will consider healthcare professionals' views, whilst Patient Research Partner input and published semi-structured interviews with patients will consider patients' views. |
|                       | 9        | A scoring process and consensus definition were described a priori.                         | Described in the 'scoring' and 'Analysis' section of this protocol.                                                                                                                                                                                                           | Described in the 'scoring' and 'Analysis' section of this protocol.                                                                                                                                                                                                                                         |
|                       | 10       | Criteria for including/dropping/adding outcomes were described a priori.                    | Described in the 'Analysis' section of this protocol.                                                                                                                                                                                                                         | Described in the 'Analysis' section of this protocol.                                                                                                                                                                                                                                                       |
|                       | 11       | Care was taken to avoid ambiguity of language used in the list of outcomes.                 | Both study content and study materials will utilise plain language summaries and clinical explanations where necessary. All materials will be reviewed with Patient Research Partners and pilot tested with patients and healthcare professionals.                            | Both study content and study materials will utilise plain language summaries and clinical explanations where necessary. All materials will be reviewed with Patient Research Partners and pilot tested with patients and healthcare professionals.                                                          |

Table 1 - Core Outcome Set Standards for Development recommendations as applied to both COSMIC: Intervention and COSMIC: Observation COS.

## Methods and Analysis

Development of the COSMIC: Intervention and COSMIC: Observation COS consists of two distinct phases:

Phase 1 concerns the generation of two long-lists of unique outcomes that are potentially relevant to key stakeholders.

The long-lists will be generated by extracting outcomes measured and reported in ongoing and published intracranial meningioma clinical effectiveness trials and clinical studies of incidental and untreated intracranial meningioma. Ongoing studies will be identified from trial registry searches, whilst published studies will be identified from systematic reviews of the literature. Phase 1 commenced after protocol manuscript submission in September 2021 and will be complete by April 2022.

Phase 2 concerns the prioritisation of the unique outcome long-lists developed in phase 1. Two, 2-round, international, multi-stakeholder, eDelphi surveys will be administered, to achieve a degree of consensus on which unique outcomes should be included or excluded in the final COSMIC: Intervention and COSMIC: Observation COS, according to pre-set criteria. Those unique outcomes without a conclusive consensus decision will be discussed in one of two online consensus meetings to ratify the final COSMIC: Intervention and COSMIC: Observation COS. A study flow-chart summarises the key steps of this project (Figure 1). Phase 2 will commence in May 2022 and will be complete by October 2022.

## Phase 1 – Generation of two long-lists of outcomes, of potential relevance to key stakeholder groups

The purpose of phase 1 is to generate two long-lists of unique outcomes measured and reported in ongoing and published intracranial meningioma clinical effectiveness trials and clinical studies of incidental and untreated intracranial meningioma. The long-lists will consist of unique outcomes that are of potential relevance to key stakeholders.

### *Trial registry search and systematic review of the literature to identify ongoing and published intracranial meningioma clinical effectiveness trials*

#### *Research question:*

What outcomes are measured and reported in ongoing and published clinical trials assessing the effectiveness of interventions including surgery, radiotherapy, stereotactic radiosurgery, pharmacotherapy, perioperative care, and supportive treatments, used in isolation or in combination for adult intracranial meningioma?

#### *Types of studies:*

This systematic review of the literature will identify published full-texts that describe phase 2, 3, and 4 clinical trials (including single-arm studies) that assess the effectiveness of an intervention for patients with an intracranial meningioma. Articles will be required to describe trial results and have a minimum of 20 adult intracranial meningioma patients. If multiple publications exist in relation to an individual study, for example an interim analysis of a clinical trial, final results, as well as an additional prognostic paper, then the publications will be considered together as one study, and repetition of data extraction would not be performed. Online international trial registries will be searched to identify ongoing trials. Only online trial registry entries and published trials written in the English language will be included, due to resource limitations.

#### *Types of interventions:*

Eligible interventions include the full breadth investigated in intracranial meningioma clinical effectiveness trials. Broadly speaking, this will include surgical interventions (including modified techniques, approaches, and adjuncts), fractionated radiotherapy (in any form including conformal three-dimensional and intensity-modulated radiotherapy), stereotactic radiosurgery (single fraction, hypofractionated or fractionated), pharmacotherapy (whereby the

investigators include outcomes related to the effectiveness of the drug, and not simply the tolerability of the drug), perioperative care (including medical therapies, anaesthetic considerations, and general aspects of the care of patients with intracranial meningioma in and around the time of treatment), and supportive treatments (for example neurorehabilitation and ongoing medical therapies for symptom control). Studies will be included if they investigate an intervention in isolation or in any combination e.g. surgical resection plus a specific radiotherapy and/or chemotherapy regime.

#### *Types of participants:*

Participants will comprise adults (18 years and above) of either sex, with a diagnosis of sporadic intracranial meningioma, including multiple meningioma and SMARCE1 related familial meningioma. The diagnosis need not be made histopathologically, as participants may potentially be recruited into trials based on a radiological diagnosis of an intracranial meningioma.

#### *Exclusion criteria:*

We will not include clinical efficacy studies, or studies of a purely experimental nature, e.g. exploratory studies to identify biomarkers. Some studies identify themselves as combined phases, for instance Phase 0/2, Phase 1/2. These studies will be evaluated and discussed between members of the study management group (SMG) to establish where the focus of the work sits. Studies with a primarily Phase 0 or 1 component will be excluded. Case studies and case series (with fewer than 20 participants) will be excluded. Meningioma within the spinal column are outside the scope of this review and COSMIC: Intervention and will be excluded. Studies investigating meningioma secondary to radiation (e.g. administered in childhood as an intervention for cancer) will not be included as this is considered a different disease entity. Similarly, studies investigating meningioma in cohorts of patients with the genetic condition Neurofibromatosis type 2 (NF2) would not be included as again, this is also considered to be a different disease entity, given the predisposition to manifest at an early age, not only meningioma, but also schwannoma of the cranial and peripheral nerves, ependymoma, astrocytoma, as well as skin and ocular findings. To include studies of spinal column, radiation-induced, and NF2-associated meningioma would identify outcomes that are likely to be of no/limited relevance to key stakeholders contributing to a consensus study to establish a COS for sporadic intracranial meningioma. Studies with a mix of brain tumour types and at least 20 patients with an intracranial meningioma would be included however, on the assumption that the outcomes measured and reported could be of relevance to key stakeholders.

1  
2 *Search strategy:*  
3

4 A detailed search strategy utilising the search strings ‘meningioma’ AND ‘trial’ has been developed and translated to  
5 interrogate the following electronic bibliographic databases: PubMed, EMBASE, MEDLINE, CINAHL via EBSCO,  
6  
7 and Web of Science. In addition, simple searches of the following trial registries will be conducted: Cochrane Central  
8  
9 Register of Controlled Trials, ClinicalTrials.gov, and the WHO International Clinical Trials Registry Platform. The  
10  
11 search strategies are provided in supplementary appendix 1. Prior to completing the review, the searches will be re-run  
12  
13 to identify new records published since the original search.  
14  
15  
16  
17

18  
19 *Identification of eligible studies:*  
20

21 Search results will be downloaded from their respective online databases, and uploaded to the online platform  
22  
23 Rayyan.[22] Following deduplication, two review authors (CPM and SMK) will independently screen all titles and  
24  
25 abstracts retrieved, according to the inclusion and exclusion criteria. Screening will be performed on the Rayyan  
26  
27 platform independently, with each review author blind to the screening choice of the other. Full-text copies of all titles  
28  
29 which appear to meet the inclusion criteria will be obtained, but also titles where a decision cannot be confidently made  
30  
31 based on title and abstract alone. The same two review authors will independently screen all full-text copies to assess  
32  
33 for eligibility. A lack of agreement at screening or full-text eligibility check will initially be discussed between the two  
34  
35 review authors and if agreement is not reached, the issue will be escalated to the senior review author (MDJ). The  
36  
37 complete reference list of full-text titles included will be screened to identify titles not identified through the searches.  
38  
39 In addition, trial registries will be searched independently by the same two reviewers implementing the same procedures  
40  
41 to identify ongoing studies not yet published which describe outcomes that will be reported.  
42  
43  
44  
45  
46  
47  
48

49 ***Trial registry search and systematic review of the literature to identify ongoing and published clinical studies of***  
50 ***incidental and untreated intracranial meningioma***  
51

52  
53  
54  
55 *Research question:*  
56

57 What outcomes are measured and reported in ongoing and published clinical studies describing cohorts of adults with  
58  
59 incidental and untreated intracranial meningioma?  
60



1  
2 *Types of studies:*  
3

4 This systematic review of the literature will identify published full-texts that describe any cohort of adults with incidental  
5 and untreated intracranial meningioma, with a minimum of 20 patients. Studies are likely to be observational in design.  
6  
7 Again, multiple publications relating to one study cohort will be considered together and online international trial  
8 registries will be searched to identify ongoing studies.  
9  
10  
11  
12  
13  
14

15 *Types of interventions:*  
16

17 This systematic review is concerned with patients who have not received a treatment intervention, but have undergone  
18 active monitoring of an incidental intracranial meningioma. Studies will be included if they present outcomes for patient  
19 cohorts who have received a radiological diagnosis of an intracranial meningioma, but no treatment intervention. For  
20 the purposes of this review, active monitoring is therefore considered to be an intervention and may include clinical  
21 review (including history and clinical examination), testing (for instance, to obtain patient-reported, caregiver-reported,  
22 or performance outcomes), and imaging (using any modality and with any frequency).  
23  
24  
25  
26  
27  
28  
29  
30  
31

32 *Types of participants:*  
33

34 Participants will comprise adults (18 years and above) of either sex, with a radiological diagnosis of an incidental  
35 intracranial meningioma or an untreated intracranial meningioma (asymptomatic or minimally symptomatic), including  
36 both patients with multiple meningioma and SMARCE1 related familial meningioma  
37  
38  
39  
40  
41

42 *Exclusion criteria:*  
43

44 Clinical studies with fewer than 20 participants will be excluded. Again, studies investigating spinal column, radiation-  
45 induced, and NF2-associated meningioma are outside the scope of this review and COSMIC: Observation, and will be  
46 excluded.  
47  
48  
49  
50  
51  
52

53 *Search strategy:*  
54

55 A detailed search strategy utilising the search strings 'meningioma' AND 'incidental' OR 'untreated' has been  
56 developed and again, translated to interrogate bibliographic databases, as well as simple trial registry searches. A re-run  
57 of searches will again be performed. These search strategies are also provided in supplementary appendix 1.  
58  
59  
60

### *Identification of eligible studies:*

Again, search results will be processed in the online platform Rayyan.[22] Following deduplication, two review authors (CPM and AII) will independently screen all titles and abstracts retrieved, according to the inclusion and exclusion criteria. Full-text evaluation for eligibility, screening for additional titles, and trial registry searches will be performed according to the aforementioned methodology.

### ***Extraction of outcomes measured and reported in ongoing and published clinical studies***

#### *Definition of an outcome:*

A trial or study outcome is a measurable variable examined in response to a treatment or intervention. Active monitoring of an intracranial meningioma shall be considered an intervention. For the purposes of this study, a trial outcome will be defined as ‘one that has original meaning and context’ and so different phrasing or spelling of a word, or an idea that addresses the same concept will be categorised as one outcome.[23] This study is therefore concerned with any measured and reported variable (trial/study outcome) that attempts to assess response or condition. The U.S. Food & Drug Administration (FDA) describe four types of clinical outcome assessment (COA) that may be reported, namely patient-reported (e.g., health-related quality of life), clinician-reported (e.g., adverse events), observer-reported (e.g., input from informal caregivers on activities of daily living), or performance outcomes (e.g., neuropsychological tests). Other traditional outcomes of relevance include those that relate to progression (and its measurement) and survival.

#### *Data extraction:*

Data will be extracted from eligible articles and trial registry entries by a single review author (CPM) into one of two custom designed and piloted spreadsheets in Microsoft Excel (v16.34, Microsoft, Washington, DC, USA) following best practice described by COMET.[19, 20] The first 10% of included titles will be dual extracted by a second review author to assess for consistency and accuracy of extraction (COSMIC: Intervention – SMK, COSMIC: Observation - AII). If differences exist in the verbatim outcomes extracted by the two review authors, this will be discussed, resolved, and a further 10% will be extracted until concordance is established. For the purposes of this study, concordance is defined as less than 5% difference between both review authors. If disagreements cannot be resolved, these will be escalated to the senior review author (MDJ).

1  
2 The following data will be extracted from each study as recommended by COMET:[19, 20] study type, study population,  
3 first author, year and journal of publication, intervention(s) under investigation, each outcome reported (recorded  
4 verbatim) from the study abstract, methods, or results, the definition of the outcome, whether outcome is a primary or  
5 secondary outcome, the indicator and/or tool(s) used to operationalize or measure the outcome, and the time points or  
6 time-period at which the outcome was measured. The number of verbatim outcomes per trial/study will be recorded.  
7  
8  
9  
10  
11  
12  
13  
14

15 Matching outcomes that have been measured at multiple time-points will not be recorded as different outcomes. As  
16 previously described, eligible articles that relate to an individual study will be considered together as one study. For  
17 example, an outcome measured and reported in exactly the same way in both an interim analysis and final results report  
18 would only be extracted once in relation to that study. If a new outcome was measured and reported in the final results  
19 report, this would be considered a new outcome and extracted in addition to all outcomes in the interim analysis.  
20  
21  
22  
23  
24  
25  
26  
27

#### 28 *Data analysis:*

29 Tabulation and descriptive data analysis will be performed in Microsoft Excel (v16.34, Microsoft, Washington, DC,  
30 USA) with the aim of deduplicating outcomes to generate two lists of unique outcomes measured and reported across  
31 the breadth of studies identified. Given that there exists considerable heterogeneity in the definition of what constitutes a  
32 unique outcome and the difficulties in prioritising and achieving consensus when similar outcomes are advanced, we  
33 describe our method of data analysis as per Young et al.,[23] and classify outcomes according to the outcome framework  
34 proposed by COMET.[19, 24]  
35  
36  
37  
38  
39  
40  
41  
42  
43  
44

45 For patient-reported outcome measures (PROMs), content analysis will be performed according to the method described  
46 by Macefield et al.[25] For each PROM identified, the PROM development paper will be identified and reviewed in  
47 order to establish whether or not the PROM is validated for use in meningioma. Frequency of use of a PROM and the  
48 studies utilising it will be listed. The number of single and multi-item scales for each PROM will be recorded. For each  
49 single- or multi-item PROM scale; verbatim scale name, verbatim scale component name, and verbatim scale component  
50 or single item description will be recorded. Verbatim scale component and single item descriptions will be classified  
51 according to the COMET taxonomy into core areas and outcome domains, followed by a subdomain category.[24] This  
52  
53  
54  
55  
56  
57  
58  
59  
60

1 process will be reviewed by members of the study advisory group (SAG) to ensure rigorous and consistent application  
2 of the classification system.  
3  
4  
5

6 ***Creation of two unique long-lists of outcomes potentially relevant to stakeholder groups of COSMIC: Intervention***  
7  
8 ***and COSMIC: Observation***  
9

10  
11  
12 Outcomes extracted in relation to intracranial meningioma clinical effectiveness trials will be used to generate the long-  
13 list for the COSMIC: Intervention eDelphi survey, whilst outcomes extracted in relation to clinical studies of incidental  
14 and untreated intracranial meningioma will be used to generate the long-list for the COSMIC: Observation eDelphi  
15 survey. Within each long list, exact matching outcomes will be deduplicated. Those outcomes that remain will be  
16 grouped for further deduplication when similarities in spelling, meaning, or context are judged to exist. For instance,  
17 the outcomes 'seizure' and 'fit' may be considered synonymous and could therefore be deduplicated to 'seizure'. Whilst  
18 the two long-lists remain separate, a consistent approach will be applied to both. For instance, if the outcomes 'seizure'  
19 and 'fit' are within both long-lists, and the outcome was deduplicated to 'seizure', this term would be selected for both  
20 long-lists. This process will be performed jointly by three members of the SMG (CPM, AII, and MDJ), then reviewed  
21 by two further SMG members (AGM and PRW), prior to final review by SAG members and patient research partners  
22 (PRPs).  
23  
24  
25  
26  
27  
28  
29  
30  
31  
32  
33  
34  
35  
36  
37

38 The data that describes 'how' and 'when' each extracted outcome is measured will be used for subsequent COS work  
39 to inform 'how' and 'when' the outcomes constituting both COS could be measured. The review will be reported in  
40 accordance with the Preferred Reporting Items for Systematic Reviews and Meta-analysis (PRISMA) guidelines where  
41 applicable,[26] which for the purposes of this study would exclude the following items (11, 12, 13e, 13f, 14, 15, 18, 19,  
42 20, 21, 22).  
43  
44  
45  
46  
47  
48  
49  
50  
51  
52  
53  
54  
55  
56  
57  
58  
59  
60

## Phase 2 – Outcome consolidation and consensus building

Phase 2 incorporates key stakeholders into The COSMIC Project which includes patients with lived experience of intracranial meningioma, along with other key stakeholder groups. The aim of phase 2 is to firstly reduce the two long-lists of unique outcomes from phase 1 by the use of two modified eDelphi surveys, and then to ratify the final COSMIC: Intervention and COSMIC: Observation COS at two independent, one-day online consensus meetings.[27]

### *eDelphi surveys*

The eDelphi surveys will adhere to the standards described by COMET [19]. As previously described, the SAG will scrutinise the two long-lists developed by the SMG to ensure both are fit for purpose. This may include removal of obsolete outcomes, further rationalisation of outcomes, or the addition of new outcomes felt to be of importance. The COSMIC project does not include primary, semi-structured interviews with patients with an intracranial meningioma. However, patient-centred outcomes have been reported in published, semi-structured interviews conducted with intracranial meningioma patients that explored the relevance of issues, and issues not addressed, in existing health-related quality of life questionnaires.[28] Additional, unique patient-centred outcomes reported in this source will be considered by the SAG, for supplementation of the two long-lists if deemed necessary.

Each unique outcome to be included in the eDelphi survey will be ascribed a lay definition. The two final long-lists of unique, COMET classified outcomes with associated lay definitions will be reviewed by the study PRPs to ensure there is clarity of meaning, a lack of replication of outcomes within each list, and lists which are acceptable to patient participants with respect to length.[29]

### *Research question:*

Which outcomes do patients with an intracranial meningioma, healthcare professionals, researchers and other key stakeholders believe should be included in a COS for use in future meningioma clinical effectiveness trials and in a COS for use in future clinical studies of incidental and/or untreated intracranial meningioma?

### *Methods:*

1 Key stakeholders, including patients with a radiological or histological diagnosis of intracranial meningioma will be  
2 invited to participate in one or both of the eDelphi surveys. The eDelphi surveys will utilise a ‘modified’ approach [30]  
3 as opposed to a ‘traditional’ approach,[31] whereby the outcomes obtained from phase 1 of the study are presented in  
4 the first round of the eDelphi surveys for rating. The first round of the eDelphi surveys will also offer the opportunity  
5 for participants to suggest outcomes that have not been presented. These outcomes would not be scored but will be  
6 reviewed prior to the second round of the eDelphi surveys by the SAG and considered for inclusion in the second round,  
7 should the outcome be judged as unique and appropriate. Two rounds will be utilised to reduce attrition bias, along with  
8 two panels (Panel 1 - Healthcare professionals and researchers, Panel 2 - Patients and relatives/patient support roles).[32]  
9 Participant level data will be pseudo-anonymised. A participant’s identity is not revealed, and responses made by an  
10 individual participant are not identifiable.  
11  
12  
13  
14  
15  
16  
17  
18  
19  
20  
21  
22

### 23 *Inclusion criteria:*

24  
25 Participants will be recruited to phase 2 of the study from three key stakeholder groups: healthcare professionals and  
26 researchers who will use the COS, patients with a radiological or histological diagnosis of intracranial meningioma, and  
27 other stakeholders in a caring or supporting role to a patient with an intracranial meningioma. All participants must be  
28 over the age of 18 and able to complete the online survey/s in English.  
29  
30  
31  
32  
33  
34  
35

### 36 Meningioma patients

37  
38 Patients who have completed or are receiving treatment for an intracranial meningioma with surgery, radiotherapy,  
39 stereotactic radiosurgery or pharmacotherapy, either in isolation or in combination are eligible to participate in the  
40 COSMIC: Intervention eDelphi survey only. Patients who have not received treatment for a radiologically diagnosed  
41 intracranial meningioma are eligible to participate in the COSMIC: Observation eDelphi survey only.  
42  
43  
44  
45  
46  
47  
48

### 49 Healthcare professionals and researchers

50  
51 Any member of the clinical team directly responsible for the care of patients with a meningioma. The neuro-oncology  
52 multi-disciplinary team (MDT; also known as the ‘tumour board’ in other countries) consists of the following roles who  
53 are all eligible to participate: neurosurgeons and ear, nose, and throat surgeons who operate on meningiomas, neuro-  
54 oncology specialist nurses, radiation oncologists, medical oncologists, neurologists, neuropathologists, and  
55 neuroradiologists. Whilst it is anticipated that the majority of researchers likely to use both COS will also be healthcare  
56  
57  
58  
59  
60

professionals directly involved in the care of patients with a meningioma, those not directly involved in care but who are likely to use the COS will also be eligible to participate (e.g. neuropsychologist or epidemiologist). Healthcare professionals are eligible and will be encouraged to participate in both eDelphi surveys.

### Caring or supporting roles

Individuals who provide a regular and involved caring or supporting role to a patient with a meningioma will be eligible to participate, including the following: primary carers, family members, and charity/support group representatives as these participants will likely offer a different but important perspective on outcomes that matter to meningioma patients. Individuals in a caring or supporting role are eligible to participate in one or both eDelphi surveys dependent upon the individual participants experience. For instance, a relative in a supporting role to a patient with an incidental and/or untreated meningioma would only be eligible to participate in COSMIC: Observation. However, a charity support worker who has provided input to both patients who have received treatment, and patients who have not, would be eligible and encouraged to participate in the eDelphi surveys for both COSMIC: Intervention and COSMIC: Observation.

### *Sampling and recruitment:*

#### Healthcare professionals

Healthcare professional participants will be recruited locally, nationally and internationally. The main study site (The Walton Centre NHS Foundation Trust) has a weekly neuro-oncology MDT meeting which will be contacted to recruit local healthcare professional participants. Neuro-oncology multidisciplinary teams or similar will be contacted at all other UK neurosurgical centres to maximise national recruitment. Where personal contacts of the study advisory group exist, these will also be utilised. National recruitment will also be sought by advertisement through national professional societies, including the British-Irish Meningioma Society (BIMS), the British Neuro-Oncology Society (BNOS), the Society of British Neurological Surgeons (SBNS), and the British Skull Base Society (BSBS).

International recruitment of healthcare professional participants will be driven again by personal contacts of the study advisory group, but also through a number of international professional societies, including the European Organisation for Research and Treatment of Cancer Brain Tumour Group (EORTC BTG), the European Association of Neuro-

1 Oncology (EANO), the International Consortium on Meningioma (ICOM), the Response Assessment in Neuro-  
2 Oncology Patient-Reported Outcome Group (RANO-PRO), and the Society for Neuro-Oncology (SNO). Key  
3 international collaborators will be asked to distribute the recruitment email within their own neuro-oncology MDT or  
4 tumour board to maximise healthcare professional recruitment. To promote participation by healthcare professionals at  
5 the forefront of meningioma clinical research, the chief investigators of published trials and studies conducted in more  
6 recent years that are identified through the systematic reviews, along with the chief investigators of ongoing clinical  
7 trials and studies will also be contacted and invited to participate.  
8  
9  
10  
11  
12  
13  
14  
15  
16

### 17 Patients and those in caring or supporting roles

18 Patients will be invited to participate in this study through charities, support groups, and social media platforms/forums.  
19 Charities and support groups will be contacted and a named contact for each will be sourced. This contact will circulate  
20 the participant invitation email, which will include a link to the study website (thecosmicproject.org) and the online  
21 DelphiManager platform. We will encourage named contacts to share recruitment details on social media, in order to  
22 recruit participants who may not be on a charity or support group mailing list, but who may interact with a social media  
23 account of the same organisation. The International Brain Tumour Alliance (IBTA), The Brain Tumour Charity (TBTC),  
24 Brainstrust – the brain cancer people, and the Brain Tumour Foundation of Canada will all likely contribute the majority  
25 of opportunities to recruit patient participants as they each maintain a database of patients with intracranial meningioma.  
26 Study social media accounts will also be created to interact directly with potential participants and thereby increase  
27 patient participant recruitment.  
28  
29  
30  
31  
32  
33  
34  
35  
36  
37  
38  
39  
40  
41

### 42 *Sample size:*

43 No specific requirements exist for the minimum number of participants to be included in an eDelphi survey in order to  
44 gain consensus,[33] but it is generally considered that having more participants increases the reliability of the groups  
45 judgement.[34] However, for the purposes of this study, a minimum of 20 participants will be required for each panel  
46 of the eDelphi surveys (Panel 1 - Healthcare professionals, Panel 2 - Patients and those in caring or supporting roles).  
47 We will not limit the number of participants who may wish to register to complete the eDelphi surveys. However, study  
48 registration after closure of round one of the eDelphi surveys will not be permitted.  
49  
50  
51  
52  
53  
54  
55  
56  
57  
58

### 59 *Registration:*



1 The study website (thecosmicproject.org) will contain all necessary information about the study. Registration to  
2 participate as an individual from any stakeholder group will only be possible via the online DelphiManager platform.  
3  
4 This is accessed through an emailed link or through the study website. On attempting to register, a number of screening  
5 questions will be asked. Firstly, registering participants will be asked to identify to which stakeholder group they belong  
6  
7 (healthcare professional and/or researcher, patient with a meningioma, primary carer, family member, charity/support  
8  
9 group representatives, or other stakeholder with a supporting role). Further screening questions will ensure the eligibility  
10  
11 criteria are met within each stakeholder group as previously described. Specific information will then be collected  
12  
13 depending on the stakeholder group chosen.  
14  
15

16  
17  
18  
19 For healthcare professionals, job role will be identified (categorised) along with years in practice (categorised). Country  
20  
21 of clinical practice will be recorded to analyse the international contribution of healthcare professionals, including  
22  
23 differences in outcome scoring by continent or region. This could have implications for dissemination of the final COS.  
24  
25

26  
27  
28 For patients with an intracranial meningioma (all of which rely on a self-reported diagnosis), baseline demographics  
29  
30 will be recorded in order to ensure the patient cohort is representative of the demography of this disease (age, sex). The  
31  
32 number of years since diagnosis (categorised) will be requested to analyse whether this variable affects the scoring of  
33  
34 outcomes. Finally, the level of treatment will be recorded for instance (incidental/untreated, surgical intervention only,  
35  
36 radiotherapy or stereotactic radiosurgery only, pharmacotherapy use, or a combination of surgery and radiotherapy or  
37  
38 stereotactic radiosurgery and/or pharmacotherapy) and number of years since diagnosis and treatment (categorised).  
39  
40 The response to the level of treatment question will determine which eDelphi survey the patient will be encouraged to  
41  
42 complete.  
43  
44

45  
46  
47 For patients, three further pieces of information will be obtained in order to evaluate methods and motivations for  
48  
49 registration for studies such as this. These will include a) the format by which recruitment was achieved, b) the principal  
50  
51 motivator for registration, and c) the most important factors within the recruitment advert for initiating registration. This  
52  
53 data will subsequently be used to analyse and draw conclusions on how best to recruit to eDelphi surveys in the future.  
54  
55

56  
57 For carers or those in a supporting role to patients with a diagnosis of intracranial meningioma, baseline demographics  
58  
59 will be recorded in order to evaluate if differences affect the scoring of outcomes (age, sex). The specific role will be  
60

1 requested (categorised). Whether the role relates to patients with incidental and/or untreated or treated intracranial  
2 meningioma will be requested and this response will determine if the participant will be encouraged to complete one of,  
3  
4 or both eDelphi surveys. The number of years in this role (categorised) will also be requested to analyse whether this  
5  
6 variable affects the scoring of outcomes.  
7  
8  
9

#### 10 *Consent:*

11  
12 Consent to participate in the eDelphi survey/s will be obtained as eConsent by all participants at the point of registration.  
13  
14 A participant information leaflet will be provided in webpage format and for download from the study website, as well  
15  
16 as an email attachment to accompany e-invitations. Sufficient time will be available for participants to choose to partake  
17  
18 in this study prior to closure of the first round of the eDelphi surveys. Similarly, consent to participate in the consensus  
19  
20 meeting will be obtained as eConsent by all participants prior to the online consensus meetings. A participant  
21  
22 information leaflet will again be provided in the same manner. Finally, participants will be offered the opportunity to  
23  
24 consent to be listed as a named individual within a collaborative authorship group; The COSMIC: Intervention  
25  
26 Collaborative and/or The COSMIC: Observation Collaborative.  
27  
28  
29  
30

#### 31 *Surveys:*

32  
33 The two eDelphi surveys will be constructed and delivered through the online DelphiManager platform. The software  
34  
35 was developed by the COMET initiative for this specific purpose. The eDelphi surveys will be piloted with members of  
36  
37 the SAG including PRPs and lay contributors. At the beginning of the eDelphi survey, instructions will be provided on  
38  
39 how to complete the survey. Plain language summaries and videos developed by the COMET 'Patient Participation,  
40  
41 Involvement and engagement group' will be utilised during the registration and eDelphi administration process to  
42  
43 facilitate understanding.  
44  
45  
46  
47  
48

49 Data collection will last for a period of 4 weeks for both rounds of both eDelphi surveys. Participants completing the  
50  
51 COSMIC: Intervention and/or COSMIC: Observation eDelphi surveys will complete both first rounds consecutively.  
52  
53 Reminders will be sent to participants who have not completed the survey/s following registration, and following a  
54  
55 request to complete round two of the survey. Reminders will be sent 2-weeks, 1-week and 48 hours prior to closure of  
56  
57 the surveys. Failure to complete the survey within the 4-week period would be recorded as a failure to complete that  
58  
59 round of the eDelphi survey.  
60

### *Scoring:*

Inclusion of an outcome in either the COSMIC: Intervention or COSMIC: Observation COS requires a large majority agreement from both panels of its critical importance.[35] During round 1 of the eDelphi surveys, participants will rate the importance of each outcome presented using the 9-point Likert scale. It shall be explained to participants that the following scores represent outcome importance, whereby (1-3) is of limited importance, (4-6) is important but not critical, and (7-9) is critically important. Previous studies have demonstrated that a 9-point scale provides adequate discrimination, does not overburden, and is suitable when a subsequent eDelphi round or consensus meeting will take place.[19, 33, 36, 37] Outcomes will be grouped by domain so that similar outcomes are viewed together. Lay terms and definitions will be used with medical terms given in brackets (utilising PRP review). Ordering of grouped outcomes will be randomised to prevent question order from impacting the results.[38]

All items from round one will be carried forward to the second round of each eDelphi survey. In the second round of the eDelphi surveys, round one response from each panel will be presented graphically for each outcome in order to demonstrate the distribution of allocated scores across the Likert scale. This method facilitates consensus building by allowing participants to consider the aggregate responses of their own, and the alternative panel.[39-41] Participants will again rate on a 9-point Likert scale. A change in score will prompt the participant to be offered the chance to explain their reasoning, but this is not mandatory. At each round of the eDelphi surveys and at the consensus meetings, data will be recorded on number of participants invited, number completing the study section, and the measure of response to each outcome. The results of the second round of each eDelphi survey will be used to determine what outcomes are dropped and what outcomes are included in the final COSMIC: Intervention and COSMIC: Observation COS, or discussed at the relevant consensus meeting if undecided.

### *Analysis:*

The definition of consensus which will include an outcome (consensus-in) beyond round two of the eDelphi surveys and during the consensus meetings is 80% or more of participants from both panels scoring an outcome as critical (7-9). Should an outcome be rated as critical by only 50% or less of participants from both panels, the outcome would be dropped (consensus-out). Consensus percentage will be calculated as follows for each panel: No. participants scoring particular outcome as critical/Total number of participants scoring that outcome x 100). Outcomes to be discussed and

1 voted on at the consensus meetings will be those that are neither included or dropped. The same definition of consensus  
2 will apply. All participants who complete both rounds of an eDelphi survey will be eligible to take part in the consensus  
3 meeting associated with that eDelphi survey. Participants eligible to complete both eDelphi surveys, who subsequently  
4 complete both rounds of both eDelphi surveys, will be eligible to take part in both consensus meetings.  
5  
6  
7  
8  
9

#### 10 *Attrition between rounds:*

11  
12 Whilst we endeavour to retain as many participants as possible between rounds one and two of the eDelphi surveys, it  
13 is expected that a proportion will not complete the second round. The attrition rate will be calculated between rounds.  
14  
15 In order to assess for attrition bias, the mean round one scores for the participants completing both rounds of an eDelphi  
16 will be compared with those that only complete the first round. The importance of completing both rounds will be  
17 emphasised. This will be recorded and analysed to compare views of those completing one vs two rounds and discussed  
18 at the consensus meeting.  
19  
20  
21  
22  
23  
24  
25  
26  
27

#### 28 *Consensus meetings*

##### 29 *Research question:*

30  
31 Can two COS be ratified for subsequent use in clinical effectiveness trials for patients with intracranial meningioma and  
32 clinical studies of incidental and untreated intracranial meningioma?  
33  
34  
35  
36  
37

##### 38 *Methods:*

39  
40 Two independent online consensus meetings will take place on two separate days. Each consensus meeting will  
41 commence with a brief presentation to reaffirm the purpose of the meeting. During each consensus meeting, outcomes  
42 categorised as ‘consensus-in’ and ‘consensus-out’ across all stakeholder groups will be reviewed first. This will provide  
43 consensus meeting participants the opportunity to discuss those outcomes that have a preliminary decision following  
44 the eDelphi surveys. Review of these outcomes may prompt further rationalisation and/or refinement of definitions. The  
45 primary focus of each meeting will be to discuss those outcomes that are yet to achieve ‘consensus-in’ or ‘consensus-  
46 out’. These outcomes will be presented in batches and discussion encouraged between all consensus meeting participants  
47 in order to move towards consensus. Each outcome will be voted on and further discussion encouraged if necessary.  
48  
49  
50  
51  
52  
53  
54  
55  
56  
57  
58

##### 59 *Sampling and recruitment:*

1 During registration for the eDelphi surveys, participants will be informed of, and asked if they would like to be  
2 considered for invitation to either one or both consensus meetings (where eligible). To be eligible, it will be mandatory  
3 that both rounds of the appropriate eDelphi survey/s are completed. Forty participants will be invited from the UK and  
4 internationally. We will apply stratified purposive sampling, based on the judgement of the SAG to select attendees in  
5 order to balance stakeholders' specialities, participant's disease severity and level of intervention where applicable.  
6  
7  
8  
9

### 10 11 12 *Scoring and analysis:*

13  
14 After each round of discussion, confidential electronic voting will take place involving all consensus meeting  
15 participants. Participants will again be required to vote on a 9-point Likert scale. The same consensus criteria applied  
16 after round two of the eDelphi surveys will also be applied at the consensus meetings. This will include the requirement  
17 that participants from both panels are in independent agreement. Only those outcomes that achieve 'consensus-in' will  
18 be included in the COSMIC: Intervention or COSMIC: Observation COS. Should either consensus meeting not achieve  
19 ratification of a COS, a further meeting would be arranged to achieve this.  
20  
21  
22  
23  
24  
25  
26  
27  
28  
29

### 30 *Patient and Public Involvement*

31 The SAG was formed to guide the management of The COSMIC Project. The SAG is formed from key stakeholder  
32 representatives. The purpose of the SAG is to ensure the aims of the study are delivered at all stages. This is achieved  
33 by obtaining feedback on proposed study methodology, delivery, and research output.  
34  
35  
36  
37  
38  
39

40 The PRP team at The Brain Tumour Charity were contacted to identify potential PRPs. One patient volunteered to join  
41 the SAG and has been involved in the design of this study. A second PRP was put into contact with the study  
42 management group by a member of the SAG. The scope of both COS has been decided with PRP input and both PRPs  
43 have a critical role in delivering this study. One PRP has received treatment, while another has not. All materials  
44 associated with this study will be reviewed by the PRPs for clarity and understanding, including recruitment materials,  
45 consent forms, participant information leaflets, and the study website. The outcome long-lists will be reviewed by the  
46 PRPs for potential missing outcomes, as well as clarity, length and meaning prior to commencement of the eDelphi  
47 surveys.[29] Two further PRPs will be recruited prior to commencement of the eDelphi surveys to facilitate this specific  
48 aim. The eDelphi surveys will be pilot tested with the PRPs. The PRPs will be remunerated for their time. Dissemination  
49 plans will be discussed and reviewed by the PRPs.  
50  
51  
52  
53  
54  
55  
56  
57  
58  
59  
60

## Ethics and Dissemination

This study is registered with the Core Outcome Measures in Effectiveness Trials (COMET) database as study 1508 and accessible at (<https://www.comet-initiative.org/Studies/Details/1508>). Institutional review board (University of Liverpool) sponsorship and ethical approval has been obtained for The COSMIC Project (Ref UoL001601). Participant eConsent will be obtained prior to participation in the eDelphi surveys and online consensus meetings.

The systematic literature reviews and trial registry searches will be published, as well as the final COSMIC: Intervention and COSMIC: Observation COS, and will be freely available. All eDelphi participants completing both rounds of the eDelphi survey for COSMIC: Intervention and/or COSMIC: Observation will be offered the opportunity to be listed as a named individual within a collaborative authorship group; The COSMIC: Intervention Collaborative and/or The COSMIC: Observation Collaborative. Results will be distributed to relevant professional organisations, as well as charity and support groups. National and international presentation of results will take place after ratification of both COS. This project will continue in order to define how and when each core outcome should be measured. Both COS will be subject to refinement with the passage of time, in order to reflect changes in key stakeholder opinion as and when treatment paradigms change.

Multiple organisations support the use of COS (NIHR Health Technology Assessment and WHO handbook for guideline development). The NIHR state in their application form 'where established core outcomes exist they should be included among the list of outcomes unless there is good reason to do otherwise'. This protocol adheres to the 13 minimum Core Outcome Set-Standardised Protocol Items (COS-STAP) recommendations.[42]

## References

1. Ostrom QT, Patil N, Cioffi G, *et al.* CBTRUS Statistical Report: Primary Brain and Other Central Nervous System Tumors Diagnosed in the United States in 2013–2017. *Neuro-Oncology*. 2020;22(Supplement\_1):iv1-iv96.
2. Louis DN, Perry A, Wesseling P, *et al.* The 2021 WHO Classification of Tumors of the Central Nervous System: a summary. *Neuro Oncol*. 2021.
3. Rogers L, Barani I, Chamberlain M, *et al.* Meningiomas: knowledge base, treatment outcomes, and uncertainties. A RANO review. *J Neurosurg*. 2015;122(1):4-23.
4. Goldbrunner R, Stavrinou P, Jenkinson MD, *et al.* EANO guideline on the diagnosis and management of meningiomas. *Neuro-Oncology*. 2021.
5. Goldbrunner R, Minniti G, Preusser M, *et al.* EANO guidelines for the diagnosis and treatment of meningiomas. *The Lancet Oncology*. 2016;17(9):e383-e91.
6. Islim AI, Mohan M, Moon RDC, *et al.* Incidental intracranial meningiomas: a systematic review and meta-analysis of prognostic factors and outcomes. *Journal of Neuro-Oncology*. 2019;142(2):211-21.
7. Behbahani M, Skeie GO, Eide GE, *et al.* A prospective study of the natural history of incidental meningioma—Hold your horses! *Neuro-Oncology Practice*. 2019;6(6):438-50.
8. Mohammad MH, Chavredakis E, Zakaria R, *et al.* A national survey of the management of patients with incidental meningioma in the United Kingdom. *British Journal of Neurosurgery*. 2017;31(4):459-63.
9. Rogers L, Zhang P, Vogelbaum MA, *et al.* Intermediate-risk meningioma: initial outcomes from NRG Oncology RTOG 0539. *J Neurosurg*. 2018;129(1):35-47.
10. Weber DC, Ares C, Villa S, *et al.* Adjuvant postoperative high-dose radiotherapy for atypical and malignant meningioma: A phase-II parallel non-randomized and observation study (EORTC 22042-26042). *Radiother Oncol*. 2018;128(2):260-5.
11. Preusser M, Silvani A, Rhun EL, *et al.* Trabectedin for recurrent WHO grade II or III meningioma: A randomized phase II study of the EORTC Brain Tumor Group (EORTC-1320-BTG). *Journal of Clinical Oncology*. 2019;37(15\_suppl):2007-.
12. Jenkinson MD, Javadpour M, Haylock BJ, *et al.* The ROAM/EORTC-1308 trial: Radiation versus Observation following surgical resection of Atypical Meningioma: study protocol for a randomised controlled trial. *Trials*. 2015;16:519.
13. Rogers L. Phase III Trial of Observation Versus Irradiation for a Gross Totally Resected Grade II Meningioma: NRGONCOLOGY; 2017 [Available from: <https://www.nrgoncology.org/Clinical-Trials/Protocol/nrg-bn003?filter=nrg-bn003>].
14. Brastianos P. Vismodegib and FAK Inhibitor GSK2256098 in Treating Patients With Progressive Meningiomas 2015 [Available from: <https://clinicaltrials.gov/ct2/show/study/NCT02523014>].
15. Jenkinson MD, Ali A, Islim AI, *et al.* Letter to the Editor. Establishing the role of prophylactic antiepileptic drugs in glioma and meningioma surgery. *J Neurosurg*. 2019;131(3):985-7.
16. Islim AI, Kolamunnage-Dona R, Mohan M, *et al.* A prognostic model to personalize monitoring regimes for patients with incidental asymptomatic meningiomas. *Neuro-Oncology*. 2019;22(2):278-89.
17. Eun Jung L, Jeong Hoon K, Eun Suk P, *et al.* A novel weighted scoring system for estimating the risk of rapid growth in untreated intracranial meningiomas. *Journal of Neurosurgery JNS*. 2017;127(5):971-80.
18. Jenkinson MD. 'Meningiomics'-an integration of data on the patient, tumour, extent of resection and molecular pathology to optimise the management and follow-up for meningiomas. *Acta Neurochir (Wien)*. 2019;161(12):2551-2.
19. Williamson PR, Altman DG, Bagley H, *et al.* The COMET Handbook: version 1.0. *Trials*. 2017;18(Suppl 3):280.
20. Williamson PR, Altman DG, Blazeby JM, *et al.* Developing core outcome sets for clinical trials: issues to consider. *Trials*. 2012;13:132.
21. Kirkham JJ, Davis K, Altman DG, *et al.* Core Outcome Set-STAndards for Development: The COS-STAD recommendations. *PLoS Med*. 2017;14(11):e1002447.



22. Ouzzani M, Hammady H, Fedorowicz Z, *et al.* Rayyan-a web and mobile app for systematic reviews. *Syst Rev.* 2016;5(1):210.
23. Young AE, Brookes ST, Avery KNL, *et al.* A systematic review of core outcome set development studies demonstrates difficulties in defining unique outcomes. *J Clin Epidemiol.* 2019;115:14-24.
24. Dodd S, Clarke M, Becker L, *et al.* A taxonomy has been developed for outcomes in medical research to help improve knowledge discovery. *J Clin Epidemiol.* 2018;96:84-92.
25. Macefield RC, Jacobs M, Korfage IJ, *et al.* Developing core outcomes sets: methods for identifying and including patient-reported outcomes (PROs). *Trials.* 2014;15:49.
26. Page MJ, McKenzie JE, Bossuyt PM, *et al.* The PRISMA 2020 statement: an updated guideline for reporting systematic reviews. *BMJ.* 2021;372:n71.
27. Biggane AM, Brading L, Ravaud P, *et al.* Survey indicated that core outcome set development is increasingly including patients, being conducted internationally and using Delphi surveys. *Trials.* 2018;19(1):113.
28. Zamanipoor Najafabadi AH, Peeters MCM, Lobatto DJ, *et al.* Health-related quality of life of cranial WHO grade I meningioma patients: are current questionnaires relevant? *Acta Neurochir (Wien).* 2017;159(11):2149-59.
29. Smith H, Horobin A, Fackrell K, *et al.* Defining and evaluating novel procedures for involving patients in Core Outcome Set research: creating a meaningful long list of candidate outcome domains. *Res Involv Engagem.* 2018;4:8.
30. Keeley T, Williamson P, Callery P, *et al.* The use of qualitative methods to inform Delphi surveys in core outcome set development. *Trials.* 2016;17(1):230.
31. Hasson F, Keeney S, McKenna H. Research guidelines for the Delphi survey technique. *J Adv Nurs.* 2000;32(4):1008-15.
32. Gargon E, Crew R, Burnside G, *et al.* Higher number of items associated with significantly lower response rates in COS Delphi surveys. *J Clin Epidemiol.* 2019;108:110-20.
33. Sinha IP, Smyth RL, Williamson PR. Using the Delphi technique to determine which outcomes to measure in clinical trials: recommendations for the future based on a systematic review of existing studies. *PLoS Med.* 2011;8(1):e1000393.
34. Murphy MK, Black NA, Lamping DL, *et al.* Consensus development methods, and their use in clinical guideline development. *Health Technol Assess.* 1998;2(3):i-iv, 1-88.
35. Jaeschke R, Guyatt GH, Dellinger P, *et al.* Use of GRADE grid to reach decisions on clinical practice guidelines when consensus is elusive. *Bmj.* 2008;337:a744.
36. De Meyer D, Kottner J, Beele H, *et al.* Delphi procedure in core outcome set development: rating scale and consensus criteria determined outcome selection. *J Clin Epidemiol.* 2019;111:23-31.
37. Lange T, Kopkow C, Lützner J, *et al.* Comparison of different rating scales for the use in Delphi studies: different scales lead to different consensus and show different test-retest reliability. *BMC Med Res Methodol.* 2020;20(1):28.
38. Brookes ST, Chalmers KA, Avery KNL, *et al.* Impact of question order on prioritisation of outcomes in the development of a core outcome set: a randomised controlled trial. *Trials.* 2018;19(1):66.
39. Brookes ST, Macefield RC, Williamson PR, *et al.* Three nested randomized controlled trials of peer-only or multiple stakeholder group feedback within Delphi surveys during core outcome and information set development. *Trials.* 2016;17(1):409.
40. Fish R, MacLennan S, Alkhaffaf B, *et al.* "Vicarious thinking" was a key driver of score change in Delphi surveys for COS development and is facilitated by feedback of results. *J Clin Epidemiol.* 2020.
41. Khodyakov D, Chen C. Response changes in Delphi processes: why is it important to provide high-quality feedback to Delphi participants? *J Clin Epidemiol.* 2020;125:160-1.
42. Kirkham JJ, Gorst S, Altman DG, *et al.* Core Outcome Set-STANDARDISED Protocol Items: the COS-STAP Statement. *Trials.* 2019;20(1):116.

## FOOTNOTES



### Authors' contributions

CPM, MDJ conceived the study. CPM, HB, AII, SK, NS, AGM, PRW, MDJ designed the study. CPM drafted the initial study protocol. TSA, HB, SB, ARB, HB, AC, LD, TG, PLG, AII, MJ, SMK, SDK, AGM, MWM, TRM, KO, PP, MP, TS, NS, MJBT, CT, CW, MW, PRW, GZ, AHZN, MDJ provided advice and input on the final protocol. CPM proofread and approved the final manuscript.

### Collaborators

International Consortium on Meningioma: Kenneth Aldape, Abdurrahman I. Islim, Karolyn Au, Jill Barnhartz-Sloan, Wenya Linda Bi, Felix Behling, Priscilla K. Brastianos, Chaya Brodie, Nicholas Butowski, Carlos Carlotti, Ana Castro, Aaron Cohen-Gadol, Marta Couce, Michael D. Cusimano, Francesco DiMeco, Katharine Drummond, Ian F. Dunn, Craig Erker, Michelle Felicella, Daniel M. Fountain, Evanthia Galanis, Norbert Galldiks, Caterina Giannini, Roland Goldbrunner, Brent Griffith, Rintaro Hashizume, C. Oliver Hanemann, Christel Herold-Mende, Luke Hnenny, Craig Horbinski, Raymond Y. Huang, David James, Michael D. Jenkinson, Christine Jungk, Gerhard Jungwirth, Timothy J. Kaufmann, Boris Krischek, Sylvia Kurz, Daniel Lachance, Christian Lafougère, Katrin Lamszus, Ian Lee, Jeff C. Liu, Serge Makarenko, Tathiana Malta, Yasin Mamatjan, Alireza Mansouri, Christian Mawrin, Michael McDermott, Christopher P. Millward, Jennifer Moliterno-Gunel, Andrew Morokoff, David Munoz, Farshad Nassiri, Houtan Noushmehr, Ho-Keung Ng, Arie Perry, Farhad Pirouzmand, Laila M Poisson, Bianca Pollo, Aditya Ragonathan, David Raleigh, Mirjam Renovanz, Franz Ricklefs, Felix Sahn, Andrea Saladino, Antonio Santacrose, Thomas Santarius, Jens Schittenhelm, Christian Schichor, David Schultz, Nils O. Schmidt, Warren Selman, Helen Shih, Andrew Sloan, Julian Spears, Matija Snuderl, James Snyder, Suganth Suppiah, Erik Sulman, Ghazaleh Tabatabai, Marcos Tatagiba, Marco Timmer, Daniela Tirapelli, Joerg C. Tonn, Derek Tsang, Michael A. Vogelbaum, Andreas von Deimling, Tobias Walbert, Simon Walling, Justin Wang, Patrick Y. Wen, Manfred Westphal, Adriana M. Workewych, Stephen Yip, Gabriel Zada, Gelareh Zadeh, Viktor Zhrebitskiy.

### Funding

CPM is funded to complete The COSMIC project by The Brain Tumour Charity grant: 'Deciphering the genetic and epigenetic landscape of clinically aggressive meningiomas' awarded to GZ and MDJ. Grant No. Jxr30103.

### Competing interests

1 MDJ received a grant from the National Institute for Health Research Health Technology Assessment program for the  
2 Radiation versus Observation for Atypical Meningioma (ROAM) trial (NIHR ID: 12/173/14). MDJ and SJM received  
3 a grant from the National Institute for Health Research Health Technology Assessment program for Surgeons Trial Of  
4 Prophylaxis for Epilepsy in seizure naïve patients with Meningioma (STOP'EM) (NIHR ID: NIHR129748). TS founded  
5 and leads the Anaplastic Meningioma International Consortium (AMiCo). TS and MDJ co-founded the British-Irish  
6 Meningioma Society (BIMS). MP has received honoraria for lectures, consultation or advisory board participation from  
7 the following for-profit companies: Bayer, Bristol-Myers Squibb, Novartis, Gerson Lehrman Group (GLG), CMC  
8 Contrast, GlaxoSmithKline, Mundipharma, Roche, BMJ Journals, MedMedia, Astra Zeneca, AbbVie, Lilly, Medahead,  
9 Daiichi Sankyo, Sanofi, Merck Sharp & Dome, Tocagen, Adastra. The following for-profit companies have supported  
10 clinical trials and contracted research conducted by MP with payments made to his institution: Böhringer-Ingelheim,  
11 Bristol-Myers Squibb, Roche, Daiichi Sankyo, Merck Sharp & Dome, Novocure, GlaxoSmithKline, AbbVie. MW has  
12 received research grants from Apogenix, Merck, Sharp & Dohme, Merck (EMD) and Quercis, and honoraria for lectures  
13 or advisory board participation or consulting from Adastra, Bristol Meyer Squibb, Medac, Merck, Sharp & Dohme,  
14 Merck (EMD), Nerviano Medical Sciences, Novartis, Orbus, Philogen and yMabs.

### 31 **Patient and public involvement**

32 Patients and/or the public were involved in the design, or conduct, or reporting, or dissemination plans of this research.

### 33 **Patient consent for publication**

34 Not required.

### 35 **Figure legends**

36 Figure 1 - A flow chart summarising the 5 stages of The COSMIC project.

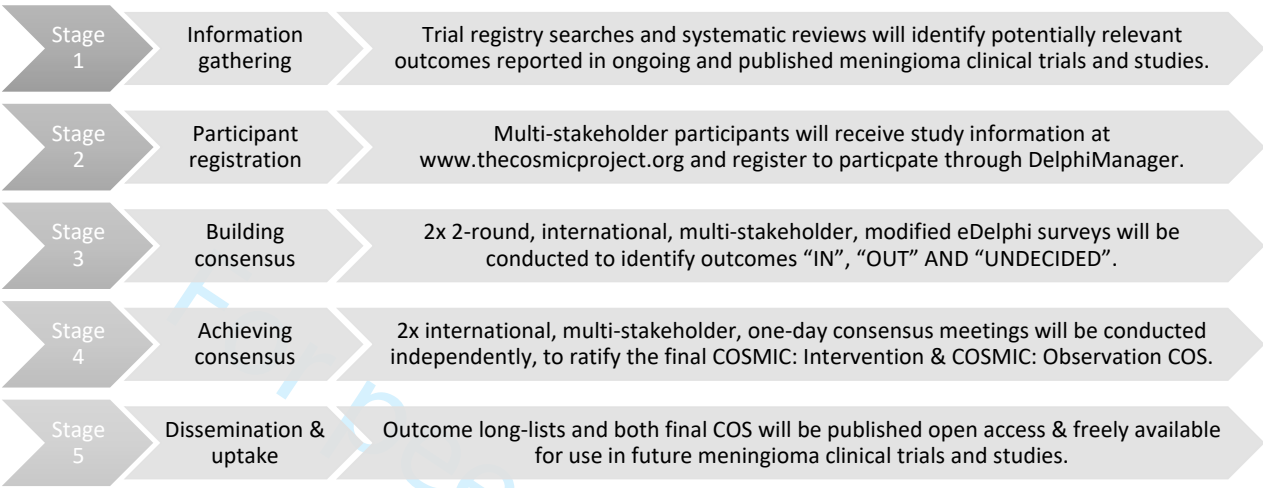

Figure 1 – A flow chart summarising the 5 stages of The COSMIC project.

### Database and Trial Registry Searches for COSMIC: Intervention

#### Medline (Ovid)

| Search | Query                                                                                                    |
|--------|----------------------------------------------------------------------------------------------------------|
| 1      | meningioma*.tw.                                                                                          |
| 2      | meningioma/                                                                                              |
| 3      | 1 or 2                                                                                                   |
| 4      | exp clinical trial/                                                                                      |
| 5      | random allocation/                                                                                       |
| 6      | double-blind method/                                                                                     |
| 7      | single-blind method/                                                                                     |
| 8      | placebos/                                                                                                |
| 9      | randomized controlled trial.pt.                                                                          |
| 10     | controlled clinical trial.pt.                                                                            |
| 11     | clinical trial.pt.                                                                                       |
| 12     | clinical trial, phase ii.pt.                                                                             |
| 13     | clinical trial, phase iii.pt.                                                                            |
| 14     | clinical trial, phase iv.pt.                                                                             |
| 15     | (clin* adj25 trial*).tw.                                                                                 |
| 16     | (control* adj25 trial*).tw.                                                                              |
| 17     | random*.tw.                                                                                              |
| 18     | ((singl* or doubl* or tripl* or treb*) adj25 (blind* or mask*)).tw.                                      |
| 19     | (phase II or phase 2).tw.                                                                                |
| 20     | (phase III or phase 3).tw.                                                                               |
| 21     | (phase IV or phase 4).tw.                                                                                |
| 22     | placebo*.tw.                                                                                             |
| 23     | 4 or 5 or 6 or 7 or 8 or 9 or 10 or 11 or 12 or 13 or 14 or 15 or 16 or 17 or 18 or 19 or 20 or 21 or 22 |
| 24     | 3 and 23                                                                                                 |
| 25     | exp animals/ not human/                                                                                  |
| 26     | 24 not 25                                                                                                |
| 27     | limit 26 to english                                                                                      |

**EMBASE (Ovid)**

| Search | Query                                                                                                  |
|--------|--------------------------------------------------------------------------------------------------------|
| 1      | 'meningioma*':ti,ab                                                                                    |
| 2      | 'meningioma'/de                                                                                        |
| 3      | #1 or #2                                                                                               |
| 4      | 'clinical trial'/exp                                                                                   |
| 5      | 'randomization'/exp                                                                                    |
| 6      | 'double blind procedure'/de                                                                            |
| 7      | 'single blind procedure'/de                                                                            |
| 8      | 'placebo'/de                                                                                           |
| 9      | (clin* NEAR/25 trial*):ti,ab                                                                           |
| 10     | (control* NEAR/25 trial*):ti,ab                                                                        |
| 11     | 'random*':ti,ab                                                                                        |
| 12     | ((singl* or doubl* or tripl* or treb*) NEAR/25 (blind* or mask*)):ti,ab                                |
| 13     | 'phase II':ti,ab                                                                                       |
| 14     | 'phase 2':ti,ab                                                                                        |
| 15     | 'phase III':ti,ab                                                                                      |
| 16     | 'phase 3':ti,ab                                                                                        |
| 17     | 'phase IV':ti,ab                                                                                       |
| 18     | 'phase 4':ti,ab                                                                                        |
| 19     | 'placebo*':ti,ab                                                                                       |
| 20     | #4 OR #5 OR #6 OR #7 OR #8 OR #9 OR #10 OR #11 OR #12 OR #13 OR #14 OR #15 OR #16 OR #17 OR #18 OR #19 |
| 21     | #3 and #20                                                                                             |
| 22     | #3 AND #20 AND [english]/lim                                                                           |

**PubMed**

| Search | Query                                                                                                                                                         |
|--------|---------------------------------------------------------------------------------------------------------------------------------------------------------------|
| 1      | meningioma*[tiab]                                                                                                                                             |
| 2      | meningioma[mh]                                                                                                                                                |
| 3      | #1 or #2                                                                                                                                                      |
| 4      | clinical trial[mh]                                                                                                                                            |
| 5      | random allocation[mh]                                                                                                                                         |
| 6      | double-blind method[mh]                                                                                                                                       |
| 7      | single-blind method[mh]                                                                                                                                       |
| 8      | placebos[mh]                                                                                                                                                  |
| 9      | randomized controlled trial[pt]                                                                                                                               |
| 10     | controlled clinical trial[pt]                                                                                                                                 |
| 11     | clinical trial[pt]                                                                                                                                            |
| 12     | clinical trial, phase ii[pt]                                                                                                                                  |
| 13     | clinical trial, phase iii[pt]                                                                                                                                 |
| 14     | clinical trial, phase iv[pt]                                                                                                                                  |
| 15     | clinical trial*[tiab]                                                                                                                                         |
| 16     | control trial*[tiab]                                                                                                                                          |
| 17     | controlled trial*[tiab]                                                                                                                                       |
| 18     | random*[tiab]                                                                                                                                                 |
| 19     | single blind*[tiab]                                                                                                                                           |
| 20     | double blind*[tiab]                                                                                                                                           |
| 21     | triple blind*[tiab]                                                                                                                                           |
| 22     | treble blind*[tiab]                                                                                                                                           |
| 23     | (phase II[tiab] OR phase 2[tiab])                                                                                                                             |
| 24     | (phase III[tiab] OR phase 3[tiab])                                                                                                                            |
| 25     | (phase IV[tiab] OR phase 4[tiab])                                                                                                                             |
| 26     | placebo*[tiab]                                                                                                                                                |
| 27     | #4 OR #5 OR #6 OR #7 OR #8 OR #9 OR #10 OR #11 OR #12 OR<br>#13 OR #14 OR #15 OR #16 OR #17 OR #18 OR #19 OR #20 OR #21<br>OR #22 OR #23 OR #24 OR #25 OR #26 |
| 28     | #3 and #27                                                                                                                                                    |
|        | 28 was searched and English language and Human filters were applied                                                                                           |

**CINAHL Plus**

| Search | Query                                                                             |
|--------|-----------------------------------------------------------------------------------|
| S1     | TI meningioma* OR AB meningioma*                                                  |
| S2     | MH meningioma                                                                     |
| S3     | S1 OR S2                                                                          |
| S4     | MH "Clinical Trials+"                                                             |
| S5     | MH "Random Sample+"                                                               |
| S6     | MH "Placebos"                                                                     |
| S7     | PT randomized controlled trial                                                    |
| S8     | PT clinical trial                                                                 |
| S9     | TI clin* trial* OR AB clin* trial*                                                |
| S10    | TI control* trial* OR AB control* trial*                                          |
| S11    | TI random* OR AB random*                                                          |
| S12    | TI ((singl* OR doubl* OR tripl* OR treb*) AND (blind* OR mask*))                  |
| S13    | AB ((singl* OR doubl* OR tripl* OR treb*) AND (blind* OR mask*))                  |
| S14    | TI (phase II OR phase III OR phase IV OR phase 2 OR phase 3 OR phase 4)           |
| S15    | AB (phase II OR phase III OR phase IV OR phase 2 OR phase 3 OR phase 4)           |
| S16    | TI placebo* OR AB placebo*                                                        |
| S17    | S4 OR S5 OR S6 OR S7 OR S8 OR S9 OR S10 OR S11 OR S12 OR S13 OR S14 OR S15 OR S16 |
| S18    | S3 AND S17                                                                        |
| S19    | S3 AND S17: Narrow by Language: - English                                         |

**Web of Science**

| Search | Query                                                                |
|--------|----------------------------------------------------------------------|
| 1      | TS=(meningioma*)                                                     |
| 2      | TS=(clin* NEAR/25 trial*)                                            |
| 3      | TS=(control* NEAR/25 trial*)                                         |
| 4      | TS=(random*)                                                         |
| 5      | TS=((singl* or doubl* or tripl* or treb*) NEAR/25 (blind* or mask*)) |
| 6      | TS=(phase II or phase 2)                                             |
| 7      | TS=(phase III or phase 3)                                            |
| 8      | TS=(phase IV or phase 4)                                             |
| 9      | TS=(placebo*)                                                        |
| 10     | #2 OR #3 OR #4 OR #5 OR #6 OR #7 OR #8 OR #9                         |
| 11     | #1 AND #10                                                           |
| 12     | (#11) AND LANGUAGE: (English)                                        |



**Cochrane central register of controlled trials**

| Search | Query                                                                                   | Notes                           |
|--------|-----------------------------------------------------------------------------------------|---------------------------------|
| #1     | Meningioma*                                                                             | Title Abstract<br>Keyword       |
| #2     | Meningioma                                                                              | MeSH term: this<br>term only    |
| #3     | #1 OR #2                                                                                |                                 |
| #4     | Clinical trial                                                                          | MeSH term-<br>explode all trees |
| #5     | Random allocation                                                                       | MeSH term this<br>term only     |
| #6     | Double-blind method                                                                     | MeSH term this<br>term only     |
| #7     | Single-blind method                                                                     | MeSH term this<br>term only     |
| #8     | Placebos                                                                                | MeSH term this<br>term only     |
| #9     | clin* NEAR/25 trial*                                                                    | Title Abstract<br>Keyword       |
| #10    | control* NEAR/25 trial*                                                                 | Title Abstract<br>Keyword       |
| #11    | random*                                                                                 | Title Abstract<br>Keyword       |
| #12    | (singl* or doubl* or tripl* or treb*)<br>NEAR/25 (blind* or mask*)                      | Title Abstract<br>Keyword       |
| #13    | phase II OR phase 2                                                                     | Title Abstract<br>Keyword       |
| #14    | phase III OR phase 3                                                                    | Title Abstract<br>Keyword       |
| #15    | phase IV OR phase 4                                                                     | Title Abstract<br>Keyword       |
| #16    | placebo*                                                                                | Title Abstract<br>Keyword       |
| #17    | #4 OR #5 OR #6 OR #7 OR #8 OR #9 OR<br>#10 OR #11 OR #12 OR #13 OR #14 OR<br>#15 OR #16 |                                 |
| #18    | #3 and #17                                                                              |                                 |
|        | Trials filter selected                                                                  |                                 |

1  
2  
3 **ClinicalTrials.gov**  
4

5 Search Condition or disease – meningioma  
6  
7

8 Filters (include) – Recruitment (not yet recruiting, recruiting, enrolling by invitation, active not  
9 recruiting, suspended, completed)  
10

11 Filters (include) – Study type (interventional (clinical trial))  
12

13  
14 Filters (include) – Study phase (phase 2, phase 3, phase 4)  
15  
16

17  
18 **WHO International Clinical Trials Registry Platform**  
19

20 Search – meningioma  
21

22 Filters (include) – Phases (phase 2, phase 3, phase 4)  
23  
24  
25  
26  
27  
28  
29  
30  
31  
32  
33  
34  
35  
36  
37  
38  
39  
40  
41  
42  
43  
44  
45  
46  
47  
48  
49  
50  
51  
52  
53  
54  
55  
56  
57  
58  
59  
60

**Database and Trial Registry Searches for COSMIC: Observation****Medline (Ovid)**

| Search | Query                                                                                                                                                                                                                                                           |
|--------|-----------------------------------------------------------------------------------------------------------------------------------------------------------------------------------------------------------------------------------------------------------------|
| 1      | exp meningioma/                                                                                                                                                                                                                                                 |
| 2      | ((central nervous system or CNS or brain* or cerebral* or intracranial or intra-cranial) adj3 (cancer* or tumo?r* or malignan* or neoplas*)).mp.                                                                                                                |
| 3      | 1 or 2                                                                                                                                                                                                                                                          |
| 4      | (glioma* or glial* or glioblastoma* or GBM* or astrocytoma* or ependym* or subependym* or neurocytoma* or pineal* or pineo* or chordoma* or hamartoma* or pituitary* or craniopharyngioma* or neuroblastoma* or medulloblastoma* or lymphoma* or metastat*).mp. |
| 5      | ((lung* or breast* or skin* or blood* or h?ematolg* or dermatolog* or renal* or genitourinary*) adj3 (cancer* or tumo?r* or malignan* or neoplas*)).mp.                                                                                                         |
| 6      | (leuk?emia* or myeloma* melanoma*).mp.                                                                                                                                                                                                                          |
| 7      | 4 or 5 or 6                                                                                                                                                                                                                                                     |
| 8      | 3 not 7                                                                                                                                                                                                                                                         |
| 9      | (asymptomatic or incidental or small or untreated).mp.                                                                                                                                                                                                          |
| 10     | (surgery or radiotherapy or radiosurg* or observ* or conservative treatment or follow-up or natural history or growth).mp.                                                                                                                                      |
| 11     | 8 and 9 and 10                                                                                                                                                                                                                                                  |
| 12     | Limit 11 to English                                                                                                                                                                                                                                             |

**EMBASE (Ovid)**

| Search | Query                                                                                                                                                                                                                                                           |
|--------|-----------------------------------------------------------------------------------------------------------------------------------------------------------------------------------------------------------------------------------------------------------------|
| 1      | exp meningioma/                                                                                                                                                                                                                                                 |
| 2      | ((central nervous system or CNS or brain* or cerebral* or intracranial or intra-cranial) adj3 (cancer* or tumo?r* or malignan* or neoplas*)).mp.                                                                                                                |
| 3      | 1 or 2                                                                                                                                                                                                                                                          |
| 4      | (glioma* or glial* or glioblastoma* or GBM* or astrocytoma* or ependym* or subependym* or neurocytoma* or pineal* or pineo* or chordoma* or hamartoma* or pituitary* or craniopharyngioma* or neuroblastoma* or medulloblastoma* or lymphoma* or metastat*).mp. |
| 5      | ((lung* or breast* or skin* or blood* or h?ematolg* or dermatolog* or renal* or genitourinary*) adj3 (cancer* or tumo?r* or malignan* or neoplas*)).mp.                                                                                                         |
| 6      | (leuk?emia* or myeloma* melanoma*).mp.                                                                                                                                                                                                                          |
| 7      | 4 or 5 or 6                                                                                                                                                                                                                                                     |
| 8      | 3 not 7                                                                                                                                                                                                                                                         |
| 9      | (asymptomatic or incidental or small or untreated).mp.                                                                                                                                                                                                          |
| 10     | (surgery or radiotherapy or radiosurg* or observ* or conservative treatment or follow-up or natural history or growth).mp.                                                                                                                                      |
| 11     | 8 and 9 and 10                                                                                                                                                                                                                                                  |
| 12     | Limit 11 to English                                                                                                                                                                                                                                             |

**CINAHL Plus**

| Search | Query                                                                                                                                                                                                                                                       |
|--------|-------------------------------------------------------------------------------------------------------------------------------------------------------------------------------------------------------------------------------------------------------------|
| 1      | Meningioma                                                                                                                                                                                                                                                  |
| 2      | ((central nervous system or CNS or brain* or cerebral* or intracranial or intra-cranial) N3 (cancer* or tumo?r* or malignan* or neoplas*))                                                                                                                  |
| 3      | 1 or 2                                                                                                                                                                                                                                                      |
| 4      | (glioma* or glial* or glioblastoma* or GBM* or astrocytoma* or ependym* or subependym* or neurocytoma* or pineal* or pineo* or chordoma* or hamartoma* or pituitary* or craniopharyngioma* or neuroblastoma* or medulloblastoma* or lymphoma* or metastat*) |
| 5      | ((lung* or breast* or skin* or blood* or h?ematolg* or dermatolog* or renal* or genitourinary*) N3 (cancer* or tumo?r* or malignan* or neoplas*))                                                                                                           |
| 6      | (leuk?emia* or myeloma* melanoma*)                                                                                                                                                                                                                          |
| 7      | 4 or 5 or 6                                                                                                                                                                                                                                                 |
| 8      | 3 not 7                                                                                                                                                                                                                                                     |
| 9      | (asymptomatic or incidental or small or untreated)                                                                                                                                                                                                          |
| 10     | (surgery or radiotherapy or radiosurg* or observ* or conservative treatment or follow-up or natural history or growth)                                                                                                                                      |
| 11     | 8 and 9 and 10                                                                                                                                                                                                                                              |
| 12     | Limit 11 to English                                                                                                                                                                                                                                         |

**Cochrane central register of controlled trials**

| Search | Query                                                                                                                                                                                                                                                       |
|--------|-------------------------------------------------------------------------------------------------------------------------------------------------------------------------------------------------------------------------------------------------------------|
| 1      | Meningioma                                                                                                                                                                                                                                                  |
| 2      | ((central nervous system or CNS or brain* or cerebral* or intracranial or intra-cranial) NEAR/3 (cancer* or tumo?r* or malignan* or neoplas*))                                                                                                              |
| 3      | 1 or 2                                                                                                                                                                                                                                                      |
| 4      | (glioma* or glial* or glioblastoma* or GBM* or astrocytoma* or ependym* or subependym* or neurocytoma* or pineal* or pineo* or chordoma* or hamartoma* or pituitary* or craniopharyngioma* or neuroblastoma* or medulloblastoma* or lymphoma* or metastat*) |
| 5      | ((lung* or breast* or skin* or blood* or h?ematolg* or dermatolog* or renal* or genitourinary*) NEAR/3 (cancer* or tumo?r* or malignan* or neoplas*))                                                                                                       |
| 6      | (leuk?emia* or myeloma* melanoma*)                                                                                                                                                                                                                          |
| 7      | 4 or 5 or 6                                                                                                                                                                                                                                                 |
| 8      | 3 not 7                                                                                                                                                                                                                                                     |
| 9      | (asymptomatic or incidental or small or untreated)                                                                                                                                                                                                          |
| 10     | (surgery or radiotherapy or radiosurg* or observ* or conservative treatment or follow-up or natural history or growth)                                                                                                                                      |
| 11     | 8 and 9 and 10                                                                                                                                                                                                                                              |
| 12     | Limit 11 to English                                                                                                                                                                                                                                         |

1  
2  
3 **ClinicalTrials.gov**  
4

5 Search Condition or disease – meningioma  
6  
7

8 Filters (include) – Recruitment (not yet recruiting, recruiting, enrolling by invitation, active not  
9 recruiting, suspended, completed)  
10

11 Filters (include) – Study type (observational)  
12  
13  
14

15 **WHO International Clinical Trials Registry Platform**  
16

17 Search – meningioma  
18

19 Filters - None  
20  
21  
22  
23  
24  
25  
26  
27  
28  
29  
30  
31  
32  
33  
34  
35  
36  
37  
38  
39  
40  
41  
42  
43  
44  
45  
46  
47  
48  
49  
50  
51  
52  
53  
54  
55  
56  
57  
58  
59  
60

For peer review only
