# Supplementary material for: Development of ‘Core Outcome Sets’ for Meningioma in Clinical Studies (The COSMIC Project): protocol for two systematic literature reviews, eDelphi surveys and online consensus meetings
Source: HighWire-hosted journal article supplement (doi:10.1136/bmjopen-2021-057384), 2022-05-01
Supplement: bmjopen-2021-057384supp001_data_supplement.pdf [file bmjopen-2021-057384supp001_data_supplement.pdf]

**Database and Trial Registry Searches for COSMIC: Intervention****Medline (Ovid)**

| Search | Query                                                                                                    |
|--------|----------------------------------------------------------------------------------------------------------|
| 1      | meningioma*.tw.                                                                                          |
| 2      | meningioma/                                                                                              |
| 3      | 1 or 2                                                                                                   |
| 4      | exp clinical trial/                                                                                      |
| 5      | random allocation/                                                                                       |
| 6      | double-blind method/                                                                                     |
| 7      | single-blind method/                                                                                     |
| 8      | placebos/                                                                                                |
| 9      | randomized controlled trial.pt.                                                                          |
| 10     | controlled clinical trial.pt.                                                                            |
| 11     | clinical trial.pt.                                                                                       |
| 12     | clinical trial, phase ii.pt.                                                                             |
| 13     | clinical trial, phase iii.pt.                                                                            |
| 14     | clinical trial, phase iv.pt.                                                                             |
| 15     | (clin* adj25 trial*).tw.                                                                                 |
| 16     | (control* adj25 trial*).tw.                                                                              |
| 17     | random*.tw.                                                                                              |
| 18     | ((singl* or doubl* or tripl* or treb*) adj25 (blind* or mask*)).tw.                                      |
| 19     | (phase II or phase 2).tw.                                                                                |
| 20     | (phase III or phase 3).tw.                                                                               |
| 21     | (phase IV or phase 4).tw.                                                                                |
| 22     | placebo*.tw.                                                                                             |
| 23     | 4 or 5 or 6 or 7 or 8 or 9 or 10 or 11 or 12 or 13 or 14 or 15 or 16 or 17 or 18 or 19 or 20 or 21 or 22 |
| 24     | 3 and 23                                                                                                 |
| 25     | exp animals/ not human/                                                                                  |
| 26     | 24 not 25                                                                                                |
| 27     | limit 26 to english                                                                                      |

**EMBASE (Ovid)**

| Search | Query                                                                                                  |
|--------|--------------------------------------------------------------------------------------------------------|
| 1      | 'meningioma*':ti,ab                                                                                    |
| 2      | 'meningioma'/de                                                                                        |
| 3      | #1 or #2                                                                                               |
| 4      | 'clinical trial'/exp                                                                                   |
| 5      | 'randomization'/exp                                                                                    |
| 6      | 'double blind procedure'/de                                                                            |
| 7      | 'single blind procedure'/de                                                                            |
| 8      | 'placebo'/de                                                                                           |
| 9      | (clin* NEAR/25 trial*):ti,ab                                                                           |
| 10     | (control* NEAR/25 trial*):ti,ab                                                                        |
| 11     | 'random*':ti,ab                                                                                        |
| 12     | ((singl* or doubl* or tripl* or treb*) NEAR/25 (blind* or mask*)):ti,ab                                |
| 13     | 'phase II':ti,ab                                                                                       |
| 14     | 'phase 2':ti,ab                                                                                        |
| 15     | 'phase III':ti,ab                                                                                      |
| 16     | 'phase 3':ti,ab                                                                                        |
| 17     | 'phase IV':ti,ab                                                                                       |
| 18     | 'phase 4':ti,ab                                                                                        |
| 19     | 'placebo*':ti,ab                                                                                       |
| 20     | #4 OR #5 OR #6 OR #7 OR #8 OR #9 OR #10 OR #11 OR #12 OR #13 OR #14 OR #15 OR #16 OR #17 OR #18 OR #19 |
| 21     | #3 and #20                                                                                             |
| 22     | #3 AND #20 AND [english]/lim                                                                           |

**PubMed**

| Search | Query                                                                                                                                                   |
|--------|---------------------------------------------------------------------------------------------------------------------------------------------------------|
| 1      | meningioma*[tiab]                                                                                                                                       |
| 2      | meningioma[mh]                                                                                                                                          |
| 3      | #1 or #2                                                                                                                                                |
| 4      | clinical trial[mh]                                                                                                                                      |
| 5      | random allocation[mh]                                                                                                                                   |
| 6      | double-blind method[mh]                                                                                                                                 |
| 7      | single-blind method[mh]                                                                                                                                 |
| 8      | placebos[mh]                                                                                                                                            |
| 9      | randomized controlled trial[pt]                                                                                                                         |
| 10     | controlled clinical trial[pt]                                                                                                                           |
| 11     | clinical trial[pt]                                                                                                                                      |
| 12     | clinical trial, phase ii[pt]                                                                                                                            |
| 13     | clinical trial, phase iii[pt]                                                                                                                           |
| 14     | clinical trial, phase iv[pt]                                                                                                                            |
| 15     | clinical trial*[tiab]                                                                                                                                   |
| 16     | control trial*[tiab]                                                                                                                                    |
| 17     | controlled trial*[tiab]                                                                                                                                 |
| 18     | random*[tiab]                                                                                                                                           |
| 19     | single blind*[tiab]                                                                                                                                     |
| 20     | double blind*[tiab]                                                                                                                                     |
| 21     | triple blind*[tiab]                                                                                                                                     |
| 22     | treble blind*[tiab]                                                                                                                                     |
| 23     | (phase II[tiab] OR phase 2[tiab])                                                                                                                       |
| 24     | (phase III[tiab] OR phase 3[tiab])                                                                                                                      |
| 25     | (phase IV[tiab] OR phase 4[tiab])                                                                                                                       |
| 26     | placebo*[tiab]                                                                                                                                          |
| 27     | #4 OR #5 OR #6 OR #7 OR #8 OR #9 OR #10 OR #11 OR #12 OR #13 OR #14 OR #15 OR #16 OR #17 OR #18 OR #19 OR #20 OR #21 OR #22 OR #23 OR #24 OR #25 OR #26 |
| 28     | #3 and #27                                                                                                                                              |
|        | 28 was searched and English language and Human filters were applied                                                                                     |

**CINAHL Plus**

| Search | Query                                                                             |
|--------|-----------------------------------------------------------------------------------|
| S1     | TI meningioma* OR AB meningioma*                                                  |
| S2     | MH meningioma                                                                     |
| S3     | S1 OR S2                                                                          |
| S4     | MH "Clinical Trials+"                                                             |
| S5     | MH "Random Sample+"                                                               |
| S6     | MH "Placebos"                                                                     |
| S7     | PT randomized controlled trial                                                    |
| S8     | PT clinical trial                                                                 |
| S9     | TI clin* trial* OR AB clin* trial*                                                |
| S10    | TI control* trial* OR AB control* trial*                                          |
| S11    | TI random* OR AB random*                                                          |
| S12    | TI ((singl* OR doubl* OR tripl* OR treb*) AND (blind* OR mask*))                  |
| S13    | AB ((singl* OR doubl* OR tripl* OR treb*) AND (blind* OR mask*))                  |
| S14    | TI (phase II OR phase III OR phase IV OR phase 2 OR phase 3 OR phase 4)           |
| S15    | AB (phase II OR phase III OR phase IV OR phase 2 OR phase 3 OR phase 4)           |
| S16    | TI placebo* OR AB placebo*                                                        |
| S17    | S4 OR S5 OR S6 OR S7 OR S8 OR S9 OR S10 OR S11 OR S12 OR S13 OR S14 OR S15 OR S16 |
| S18    | S3 AND S17                                                                        |
| S19    | S3 AND S17: Narrow by Language: - English                                         |

**Web of Science**

| Search | Query                                                                |
|--------|----------------------------------------------------------------------|
| 1      | TS=(meningioma*)                                                     |
| 2      | TS=(clin* NEAR/25 trial*)                                            |
| 3      | TS=(control* NEAR/25 trial*)                                         |
| 4      | TS=(random*)                                                         |
| 5      | TS=((singl* or doubl* or tripl* or treb*) NEAR/25 (blind* or mask*)) |
| 6      | TS=(phase II or phase 2)                                             |
| 7      | TS=(phase III or phase 3)                                            |
| 8      | TS=(phase IV or phase 4)                                             |
| 9      | TS=(placebo*)                                                        |
| 10     | #2 OR #3 OR #4 OR #5 OR #6 OR #7 OR #8 OR #9                         |
| 11     | #1 AND #10                                                           |
| 12     | (#11) AND LANGUAGE: (English)                                        |

**Cochrane central register of controlled trials**

| Search | Query                                                                                   | Notes                           |
|--------|-----------------------------------------------------------------------------------------|---------------------------------|
| #1     | Meningioma*                                                                             | Title Abstract<br>Keyword       |
| #2     | Meningioma                                                                              | MeSH term: this<br>term only    |
| #3     | #1 OR #2                                                                                |                                 |
| #4     | Clinical trial                                                                          | MeSH term-<br>explode all trees |
| #5     | Random allocation                                                                       | MeSH term this<br>term only     |
| #6     | Double-blind method                                                                     | MeSH term this<br>term only     |
| #7     | Single-blind method                                                                     | MeSH term this<br>term only     |
| #8     | Placebos                                                                                | MeSH term this<br>term only     |
| #9     | clin* NEAR/25 trial*                                                                    | Title Abstract<br>Keyword       |
| #10    | control* NEAR/25 trial*                                                                 | Title Abstract<br>Keyword       |
| #11    | random*                                                                                 | Title Abstract<br>Keyword       |
| #12    | (singl* or doubl* or tripl* or treb*)<br>NEAR/25 (blind* or mask*)                      | Title Abstract<br>Keyword       |
| #13    | phase II OR phase 2                                                                     | Title Abstract<br>Keyword       |
| #14    | phase III OR phase 3                                                                    | Title Abstract<br>Keyword       |
| #15    | phase IV OR phase 4                                                                     | Title Abstract<br>Keyword       |
| #16    | placebo*                                                                                | Title Abstract<br>Keyword       |
| #17    | #4 OR #5 OR #6 OR #7 OR #8 OR #9 OR<br>#10 OR #11 OR #12 OR #13 OR #14 OR<br>#15 OR #16 |                                 |
| #18    | #3 and #17                                                                              |                                 |
|        | Trials filter selected                                                                  |                                 |

**ClinicalTrials.gov**

Search Condition or disease – meningioma

Filters (include) – Recruitment (not yet recruiting, recruiting, enrolling by invitation, active not recruiting, suspended, completed)

Filters (include) – Study type (interventional (clinical trial))

Filters (include) – Study phase (phase 2, phase 3, phase 4)

**WHO International Clinical Trials Registry Platform**

Search – meningioma

Filters (include) – Phases (phase 2, phase 3, phase 4)

**Database and Trial Registry Searches for COSMIC: Observation****Medline (Ovid)**

| Search | Query                                                                                                                                                                                                                                                           |
|--------|-----------------------------------------------------------------------------------------------------------------------------------------------------------------------------------------------------------------------------------------------------------------|
| 1      | exp meningioma/                                                                                                                                                                                                                                                 |
| 2      | ((central nervous system or CNS or brain* or cerebral* or intracranial or intra-cranial) adj3 (cancer* or tumo?r* or malignan* or neoplas*)).mp.                                                                                                                |
| 3      | 1 or 2                                                                                                                                                                                                                                                          |
| 4      | (glioma* or glial* or glioblastoma* or GBM* or astrocytoma* or ependym* or subependym* or neurocytoma* or pineal* or pineo* or chordoma* or hamartoma* or pituitary* or craniopharyngioma* or neuroblastoma* or medulloblastoma* or lymphoma* or metastat*).mp. |
| 5      | ((lung* or breast* or skin* or blood* or h?ematolg* or dermatolog* or renal* or genitourinary*) adj3 (cancer* or tumo?r* or malignan* or neoplas*)).mp.                                                                                                         |
| 6      | (leuk?emia* or myeloma* melanoma*).mp.                                                                                                                                                                                                                          |
| 7      | 4 or 5 or 6                                                                                                                                                                                                                                                     |
| 8      | 3 not 7                                                                                                                                                                                                                                                         |
| 9      | (asymptomatic or incidental or small or untreated).mp.                                                                                                                                                                                                          |
| 10     | (surgery or radiotherapy or radiosurg* or observ* or conservative treatment or follow-up or natural history or growth).mp.                                                                                                                                      |
| 11     | 8 and 9 and 10                                                                                                                                                                                                                                                  |
| 12     | Limit 11 to English                                                                                                                                                                                                                                             |



**EMBASE (Ovid)**

| Search | Query                                                                                                                                                                                                                                                           |
|--------|-----------------------------------------------------------------------------------------------------------------------------------------------------------------------------------------------------------------------------------------------------------------|
| 1      | exp meningioma/                                                                                                                                                                                                                                                 |
| 2      | ((central nervous system or CNS or brain* or cerebral* or intracranial or intra-cranial) adj3 (cancer* or tumo?r* or malignan* or neoplas*)).mp.                                                                                                                |
| 3      | 1 or 2                                                                                                                                                                                                                                                          |
| 4      | (glioma* or glial* or glioblastoma* or GBM* or astrocytoma* or ependym* or subependym* or neurocytoma* or pineal* or pineo* or chordoma* or hamartoma* or pituitary* or craniopharyngioma* or neuroblastoma* or medulloblastoma* or lymphoma* or metastat*).mp. |
| 5      | ((lung* or breast* or skin* or blood* or h?ematolg* or dermatolog* or renal* or genitourinary*) adj3 (cancer* or tumo?r* or malignan* or neoplas*)).mp.                                                                                                         |
| 6      | (leuk?emia* or myeloma* melanoma*).mp.                                                                                                                                                                                                                          |
| 7      | 4 or 5 or 6                                                                                                                                                                                                                                                     |
| 8      | 3 not 7                                                                                                                                                                                                                                                         |
| 9      | (asymptomatic or incidental or small or untreated).mp.                                                                                                                                                                                                          |
| 10     | (surgery or radiotherapy or radiosurg* or observ* or conservative treatment or follow-up or natural history or growth).mp.                                                                                                                                      |
| 11     | 8 and 9 and 10                                                                                                                                                                                                                                                  |
| 12     | Limit 11 to English                                                                                                                                                                                                                                             |

**CINAHL Plus**

| Search | Query                                                                                                                                                                                                                                                       |
|--------|-------------------------------------------------------------------------------------------------------------------------------------------------------------------------------------------------------------------------------------------------------------|
| 1      | Meningioma                                                                                                                                                                                                                                                  |
| 2      | ((central nervous system or CNS or brain* or cerebral* or intracranial or intra-cranial) N3 (cancer* or tumo?r* or malignan* or neoplas*))                                                                                                                  |
| 3      | 1 or 2                                                                                                                                                                                                                                                      |
| 4      | (glioma* or glial* or glioblastoma* or GBM* or astrocytoma* or ependym* or subependym* or neurocytoma* or pineal* or pineo* or chordoma* or hamartoma* or pituitary* or craniopharyngioma* or neuroblastoma* or medulloblastoma* or lymphoma* or metastat*) |
| 5      | ((lung* or breast* or skin* or blood* or h?ematolg* or dermatolog* or renal* or genitourinary*) N3 (cancer* or tumo?r* or malignan* or neoplas*))                                                                                                           |
| 6      | (leuk?emia* or myeloma* melanoma*)                                                                                                                                                                                                                          |
| 7      | 4 or 5 or 6                                                                                                                                                                                                                                                 |
| 8      | 3 not 7                                                                                                                                                                                                                                                     |
| 9      | (asymptomatic or incidental or small or untreated)                                                                                                                                                                                                          |
| 10     | (surgery or radiotherapy or radiosurg* or observ* or conservative treatment or follow-up or natural history or growth)                                                                                                                                      |
| 11     | 8 and 9 and 10                                                                                                                                                                                                                                              |
| 12     | Limit 11 to English                                                                                                                                                                                                                                         |

**Cochrane central register of controlled trials**

| Search | Query                                                                                                                                                                                                                                                       |
|--------|-------------------------------------------------------------------------------------------------------------------------------------------------------------------------------------------------------------------------------------------------------------|
| 1      | Meningioma                                                                                                                                                                                                                                                  |
| 2      | ((central nervous system or CNS or brain* or cerebral* or intracranial or intra-cranial) NEAR/3 (cancer* or tumo?r* or malignan* or neoplas*))                                                                                                              |
| 3      | 1 or 2                                                                                                                                                                                                                                                      |
| 4      | (glioma* or glial* or glioblastoma* or GBM* or astrocytoma* or ependym* or subependym* or neurocytoma* or pineal* or pineo* or chordoma* or hamartoma* or pituitary* or craniopharyngioma* or neuroblastoma* or medulloblastoma* or lymphoma* or metastat*) |
| 5      | ((lung* or breast* or skin* or blood* or h?ematolg* or dermatolog* or renal* or genitourinary*) NEAR/3 (cancer* or tumo?r* or malignan* or neoplas*))                                                                                                       |
| 6      | (leuk?emia* or myeloma* melanoma*)                                                                                                                                                                                                                          |
| 7      | 4 or 5 or 6                                                                                                                                                                                                                                                 |
| 8      | 3 not 7                                                                                                                                                                                                                                                     |
| 9      | (asymptomatic or incidental or small or untreated)                                                                                                                                                                                                          |
| 10     | (surgery or radiotherapy or radiosurg* or observ* or conservative treatment or follow-up or natural history or growth)                                                                                                                                      |
| 11     | 8 and 9 and 10                                                                                                                                                                                                                                              |
| 12     | Limit 11 to English                                                                                                                                                                                                                                         |

**ClinicalTrials.gov**

Search Condition or disease – meningioma

Filters (include) – Recruitment (not yet recruiting, recruiting, enrolling by invitation, active not recruiting, suspended, completed)

Filters (include) – Study type (observational)

**WHO International Clinical Trials Registry Platform**

Search – meningioma

Filters - None
